# Supplementary material for: Cohort profile: Oxford Pain, Activity and Lifestyle (OPAL) Study, a prospective cohort study of older adults in England
Source: PubMed Central journal article supplement (PMC7473632; doi:10.1136/bmjopen-2020-037516), 2020-09-03
Supplement: bmjopen-2020-037516.draft_revisions.pdf [file bmjopen-2020-037516.draft_revisions.pdf]

# BMJ Open

BMJ Open is committed to open peer review. As part of this commitment we make the peer review history of every article we publish publicly available.

When an article is published we post the peer reviewers' comments and the authors' responses online. We also post the versions of the paper that were used during peer review. These are the versions that the peer review comments apply to.

The versions of the paper that follow are the versions that were submitted during the peer review process. They are not the versions of record or the final published versions. They should not be cited or distributed as the published version of this manuscript.

BMJ Open is an open access journal and the full, final, typeset and author-corrected version of record of the manuscript is available on our site with no access controls, subscription charges or pay-per-view fees (<http://bmjopen.bmj.com>).

If you have any questions on BMJ Open's open peer review process please email [info.bmjopen@bmj.com](mailto:info.bmjopen@bmj.com)

# BMJ Open

## Cohort profile: Oxford Pain, Activity and Lifestyle (OPAL) study, a prospective cohort study of older adults in England

|                                                                                                                                                                                                        |                                                                                                                                                                                                                                                                                                                                                                                                                                                                                                                                                                                                                                                                                                                                                                                                                                                                                                                                                                                                                                                                                                                                                                                                                                                                                                                                                                    |
|--------------------------------------------------------------------------------------------------------------------------------------------------------------------------------------------------------|--------------------------------------------------------------------------------------------------------------------------------------------------------------------------------------------------------------------------------------------------------------------------------------------------------------------------------------------------------------------------------------------------------------------------------------------------------------------------------------------------------------------------------------------------------------------------------------------------------------------------------------------------------------------------------------------------------------------------------------------------------------------------------------------------------------------------------------------------------------------------------------------------------------------------------------------------------------------------------------------------------------------------------------------------------------------------------------------------------------------------------------------------------------------------------------------------------------------------------------------------------------------------------------------------------------------------------------------------------------------|
| Journal:                                                                                                                                                                                               | <i>BMJ Open</i>                                                                                                                                                                                                                                                                                                                                                                                                                                                                                                                                                                                                                                                                                                                                                                                                                                                                                                                                                                                                                                                                                                                                                                                                                                                                                                                                                    |
| Manuscript ID                                                                                                                                                                                          | bmjopen-2020-037516                                                                                                                                                                                                                                                                                                                                                                                                                                                                                                                                                                                                                                                                                                                                                                                                                                                                                                                                                                                                                                                                                                                                                                                                                                                                                                                                                |
| Article Type:                                                                                                                                                                                          | Cohort profile                                                                                                                                                                                                                                                                                                                                                                                                                                                                                                                                                                                                                                                                                                                                                                                                                                                                                                                                                                                                                                                                                                                                                                                                                                                                                                                                                     |
| Date Submitted by the Author:                                                                                                                                                                          | 05-Feb-2020                                                                                                                                                                                                                                                                                                                                                                                                                                                                                                                                                                                                                                                                                                                                                                                                                                                                                                                                                                                                                                                                                                                                                                                                                                                                                                                                                        |
| Complete List of Authors:                                                                                                                                                                              | <p>Sanchez Santos, Maria ; University of Oxford, Centre for Rehabilitation Research in Oxford, Nuffield Department of Orthopaedics, Rheumatology and Musculoskeletal Sciences</p> <p>Williamson, Esther; University of Oxford, Centre for Rehabilitation Research in Oxford, Nuffield Department of Orthopaedics, Rheumatology and Musculoskeletal Sciences</p> <p>Bruce, Julie; University of Warwick, Warwick Clinical Trials Unit</p> <p>Ward, Lesley; University of Oxford, Centre for Rehabilitation Research in Oxford, Nuffield Department of Rheumatology, Orthopaedics and Musculoskeletal Sciences; Northumbria University, Department of Sport, Exercise &amp; Rehabilitation</p> <p>Mallen, Christian; Keele University, Arthritis Research UK Primary Care Centre</p> <p>Garrett, Angela; University of Oxford, Centre for Rehabilitation Research in Oxford, Nuffield Department of Orthopaedics Rheumatology and Musculoskeletal Sciences</p> <p>Morris , Alana ; University of Oxford, Centre for Rehabilitation Research in Oxford, Nuffield Department of Orthopaedics Rheumatology and Musculoskeletal Sciences</p> <p>Lamb, Sarah; University of Exeter, College of Medicine and Health; University of Oxford, Centre for Rehabilitation Research in Oxford, Nuffield Department of Orthopaedics Rheumatology and Musculoskeletal Sciences</p> |
| Keywords:                                                                                                                                                                                              | EPIDEMIOLOGY, GERIATRIC MEDICINE, Musculoskeletal disorders < ORTHOPAEDIC & TRAUMA SURGERY, PRIMARY CARE                                                                                                                                                                                                                                                                                                                                                                                                                                                                                                                                                                                                                                                                                                                                                                                                                                                                                                                                                                                                                                                                                                                                                                                                                                                           |
| <p>Note: The following files were submitted by the author for peer review, but cannot be converted to PDF. You must view these files (e.g. movies) online.</p> <p>Data_management_wave8_Dec2019.do</p> |                                                                                                                                                                                                                                                                                                                                                                                                                                                                                                                                                                                                                                                                                                                                                                                                                                                                                                                                                                                                                                                                                                                                                                                                                                                                                                                                                                    |

SCHOLARONE™  
Manuscripts

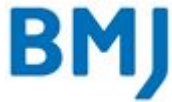

I, the Submitting Author has the right to grant and does grant on behalf of all authors of the Work (as defined in the below author licence), an exclusive licence and/or a non-exclusive licence for contributions from authors who are: i) UK Crown employees; ii) where BMJ has agreed a CC-BY licence shall apply, and/or iii) in accordance with the terms applicable for US Federal Government officers or employees acting as part of their official duties; on a worldwide, perpetual, irrevocable, royalty-free basis to BMJ Publishing Group Ltd ("BMJ") its licensees and where the relevant Journal is co-owned by BMJ to the co-owners of the Journal, to publish the Work in this journal and any other BMJ products and to exploit all rights, as set out in our [licence](#).

The Submitting Author accepts and understands that any supply made under these terms is made by BMJ to the Submitting Author unless you are acting as an employee on behalf of your employer or a postgraduate student of an affiliated institution which is paying any applicable article publishing charge ("APC") for Open Access articles. Where the Submitting Author wishes to make the Work available on an Open Access basis (and intends to pay the relevant APC), the terms of reuse of such Open Access shall be governed by a Creative Commons licence – details of these licences and which [Creative Commons](#) licence will apply to this Work are set out in our licence referred to above.

Other than as permitted in any relevant BMJ Author's Self Archiving Policies, I confirm this Work has not been accepted for publication elsewhere, is not being considered for publication elsewhere and does not duplicate material already published. I confirm all authors consent to publication of this Work and authorise the granting of this licence.

1  
2  
3 **Cohort profile: Oxford Pain, Activity and Lifestyle (OPAL) study, a**  
4 **prospective cohort study of older adults in England**  
5  
6  
7  
8  
9

10 Maria T Sanchez-Santos<sup>1</sup>, Esther Williamson<sup>1</sup>, Julie Bruce<sup>2</sup>, Lesley Ward<sup>1,3</sup>, Christian D. Mallen<sup>4</sup>,  
11  
12 Angela Garrett<sup>1</sup>, Alana Morris<sup>1</sup>, Sarah E Lamb<sup>1,5</sup> on behalf of the OPAL study team  
13  
14  
15

16  
17  
18 **Authors' affiliations:**  
19

20  
21 <sup>1</sup>Centre for Rehabilitation Research, Nuffield Department of Rheumatology, Orthopaedics and  
22  
23 Musculoskeletal Sciences, University of Oxford, Oxford, United Kingdom (UK)  
24

25  
26 <sup>2</sup>Warwick Clinical Trials Unit, Division of Health Sciences, University of Warwick, Coventry, UK  
27

28  
29 <sup>3</sup>Department of Sport, Exercise & Rehabilitation, Northumbria University, Newcastle-upon-Tyne  
30

31  
32 <sup>4</sup>School of Primary, Community and Social Care, Keele University, Staffordshire  
33

34  
35 <sup>5</sup>College of Medicine and Health, University of Exeter, UK  
36  
37  
38

39 **Corresponding Author:** Sarah E Lamb

40  
41 Email: [S.E.Lamb@exeter.ac.uk](mailto:S.E.Lamb@exeter.ac.uk)  
42

43  
44 Tel: +44(0)1392 722 370  
45

46  
47 Heavitree Road, Exeter, Devon, EX1 2LU  
48  
49  
50

51 **Words:** Abstract: 289; Main text: 3,806; **Tables:** 3; **Figures:** 2  
52

53 **Supplementary files:** 2; **References:** 57  
54  
55  
56  
57  
58  
59  
60

## Abstract

**PURPOSE:** The 'Oxford Pain, Activity and Lifestyle' (OPAL) cohort is a longitudinal, prospective cohort study of adults, aged 65 years and older, living in the community which is investigating the determinants of health in later life. The initial focus was on musculoskeletal pain and mobility, but the cohort was designed with flexibility to include new elements over time. This paper describes the study design, data collection, and baseline characteristics of participants. We also compared the OPAL baseline characteristics with a representative sample of community-dwelling older people, The English Longitudinal Study of Ageing (ELSA).

**PARTICIPANTS:** We randomly selected eligible participants from two stratified age bands (65-74 and 75 and over years). In total, 5,409 individuals (42.1% of eligible participants) from 35 general practices agreed to participate between 2016 and 2018. The majority of participants (n=5,367) also consented for research team to access their UK NHS Digital and primary health care records.

**FINDINGS TO DATE:** Mean participant age was 74.9 years (range 65-100); 51.5% (n=2,784/5,409) were women. 94.9% of participants were white, and 28.8% lived alone. Over 83.0% reported pain in at least one body area in the previous six weeks. Pain was more prevalent in women (86.0%). Over 29.0% of participants reported having one or more falls in the last year. Most participants were confident in their ability to walk outside. Characteristics of OPAL participants were similar to the ELSA population.

**FUTURE PLANS:** Postal follow-up of the cohort is being undertaken at annual intervals, with data collection ongoing. Linkage to NHS hospital admission data is planned. This English prospective cohort offers a large and rich resource for research on the longitudinal associations between demographic, clinical, and social factors and health trajectories and outcomes in older people living in the community.

## Strengths and limitations of this study

- OPAL is a new, high quality cohort of older community-dwelling men and women exploring causes and consequences of pain, frailty, mobility decline, disability and poor health-related quality of life.
- A total of 5,409 older adults from 35 general practices in nine distinct areas in England participated at baseline, 2016-2018.
- The data comprise a wide range of self-reported variables. These include lifestyle measures, attitudes and beliefs, socioeconomic status and health-related outcomes.
- Nearly all participants (n=5,367/5,409; 99.2%) have given informed consent to access their UK NHS Digital and primary health care data.
- OPAL participants are similar to those in general population.

## Introduction

The population of the United Kingdom (UK) is undergoing a fundamental change in its age structure, due to lower birth rates and extended life expectancy. One in four people in the UK are projected to be aged 65 or over by 2050, with 15% aged over 75 years and 5% aged 85 years or older<sup>1</sup>. This change reflects gains in health and social development, and it is important that as many years of life are spent in good health as possible.

Active independence is one of the key concerns of older people, and mobility is critically important to this<sup>2 3</sup>. Older people value their mobility highly and they consider mobility loss as a key disadvantage of aging<sup>4</sup>. Poor or limited mobility is linked to functional decline, mortality, and increased health care utilization<sup>5</sup>. Conceptually, factors associated with mobility decline precede

1  
2  
3 disability within models of disablement. Therefore, identification of factors associated with mobility  
4 decline are important for prevention of, and rehabilitation from, mobility decline<sup>6</sup>.

5  
6  
7  
8 Musculoskeletal pain is one of the leading causes of disability and disease burden worldwide among  
9  
10 community-dwelling older adults<sup>7 8</sup>. A recent review estimated that the prevalence of chronic pain  
11 among older adults in the UK ranged from 42% in 65-74 years old to 62% in the over 75 age group<sup>9</sup>.  
12  
13 These estimates are similar to other developed countries<sup>10</sup>.

14  
15  
16  
17  
18 Musculoskeletal pain has a large impact on many other aspects of older people's health such as loss  
19 of mobility, frailty, cognitive impairment, falls, and poor sleep quality<sup>11-15</sup>. However, the role of  
20 musculoskeletal pain on adverse health outcomes in older adults is poorly understood.  
21  
22

23  
24  
25  
26  
27 In order to address these knowledge gaps, we assembled the Oxford Pain, Activity and Lifestyle  
28 (OPAL) cohort, a prospective study of community dwelling older adults. The immediate objectives  
29 were:  
30  
31  
32

- 33  
34  
35 • To investigate the causes and consequences of mobility decline and disability in later life, and  
36 the role and contribution of musculoskeletal pain and other factors;
- 37  
38  
39 • To develop a prognostic tool to assess mobility decline in a population-based cohort of older  
40 adults in UK;
- 41  
42  
43  
44  
45 • To investigate factors that moderate or mediate the effects of musculoskeletal pain on health  
46 outcomes.  
47  
48

49  
50  
51  
52 In addition, we intend to use the OPAL cohort to identify potential participants for future clinical trials  
53 in disability prevention in later life and to study disablement and multi-morbidity more broadly. The  
54 'cohort multiple randomised controlled trials' design is becoming increasingly common<sup>16 17</sup>. The  
55 concept is to use data collected in a cohort to identify people with specific health conditions and  
56  
57  
58  
59  
60

1  
2  
3 then, as and when the opportunity arises, invite them to participate in a clinical trial relevant to their  
4  
5 condition.  
6  
7  
8  
9

10 In this paper, we describe the OPAL cohort, design, data collection, and the profile of the participants  
11  
12 at baseline and their overall representativeness of the English general population.  
13  
14  
15  
16

## 17 **Cohort description**

### 18 **Study design**

19  
20 A population-based, longitudinal, prospective cohort study in England, using a combination of  
21  
22 annually administered, self-reported questionnaires and routinely collected health data.  
23  
24  
25  
26  
27  
28  
29

### 30 **Practice and participant identification**

#### 31 *General practice identification*

32  
33 General practices who were predominantly working with the UK NIHR Clinical Research Network  
34  
35 (CRN) were approached to take part in the study. In terms of geographical spread, we included a  
36  
37 range of rural and urban areas across England, to capture diversity in both socioeconomic and ethnic  
38  
39 profiles.  
40  
41  
42  
43

#### 44 *Participant identification*

45  
46 Eligible Participants were identified from electronic record searches of general practice lists. A  
47  
48 random sample of approximately 400 individuals (median: 365; range 158-400) per practice was  
49  
50 selected (Figure 1) and stratified to ensure equal representation in the following two age bands: 65-  
51  
52 74 years and 75 years and over (~200 individuals per practice within each age group). We estimated  
53  
54 response rate between 30-40% amongst eligible participants based on previous experience of  
55  
56 recruitment of older people from general practice<sup>18</sup>.  
57  
58  
59  
60



### *Inclusion criteria*

People registered with a general practice, aged 65 years and older, and living in the community, including sheltered or supported housing, were eligible for invitation.

### *Exclusion criteria*

Individuals were excluded if they lived in a residential care or nursing home. Following the generation of the random sample, a designated General Practitioner (GP) or research nurse per practice screened the list to exclude those with known terminal illness with a life expectancy of less than six months, who presented with severe health or social concerns sufficient to preclude approach, or who were considered unable to provide informed consent.

### **Recruitment and enrolment**

Recruitment and enrolment to OPAL commenced in October 2016 and it was completed in September 2018. A total of 12,839 individuals from thirty-five general practices in nine different areas of England were invited to take part in the study (Figure 1). A pack including an invitation letter, participant information leaflet, consent form, baseline questionnaire, and a postage paid return envelope was sent by the general practice. Five thousand four hundred and nine (42.1% of those eligible; range 5.1%-65.8% across practices) individuals who returned the baseline questionnaire and a signed consent form to the University of Oxford study office were enrolled in the study (Figure 1). One-fifth (21.3% of those eligible;  $n=2,736/12,839$ ) declined participation and 4,694 (36.6%;  $n=4,694/12,839$ ) did not respond. Non-responders were sent one postal reminder, four weeks after the original invitation. If no response was received, no further contact was made.

### How often are they being followed up?

Study participants are being followed by postal questionnaire at annual intervals. First year follow up has now been completed, and second and third year follow-up will be concluded around September 2020 and 2021, respectively. Future follow-up questionnaires will be sent at four and five years from the date of the original invitation.

### What is being measured?

#### *Postal self-completed questionnaire*

The OPAL cohort study includes information on a range of domains including demographic, socioeconomic, lifestyle variables, social participation, attitudes to ageing, musculoskeletal pain, health-related factors, comorbidity, mobility, disability, frailty, cognitive function, health-related quality of life, and medications (see Table 1).

*Musculoskeletal pain* is assessed by asking the participant if they have experienced pain in nine different body sites (knees, hands/wrists, neck, shoulders, hips, feet/ankles, elbows, lower and upper back) during the last six weeks<sup>19 20</sup>. Information on presence, frequency, troublesomeness, onset, and description of back pain in the last six weeks was collected using recognised methods<sup>20-22</sup>. Information about the spread of back related symptoms was also included. To identify individuals with possible spinal stenosis we asked whether participant's pain travelled into their buttocks/legs, whether it was exacerbated while standing up or walking and whether the symptoms improved when sitting down or bending forward<sup>23 24</sup>. *Mobility* was assessed using different measures. Confidence to walk a half a mile was assessed using a single item from the Modified Gait Self-efficacy scale which is rated on a 1 'not confident at all' to 10 "totally confident" scale<sup>25</sup>. Participants also reported their perceived usual walking pace outdoors with six possible responses: "Unable to walk", "very slow", "stroll at an easy pace", "normal", "fairly brisk" and "fast". Change in mobility in the last year was

1  
2  
3 measured with the question “Compared with 1 year ago, how would you rate your walking in  
4 general?” (Response options: much better, somewhat better, about the same, somewhat worse or  
5  
6 much worse than a year ago). Participant, family, friends or doctor’s concerns about participant  
7  
8 ability to walk and move around was measured using two questions. Potential responses were  
9  
10 “Extremely”, “A little concerned” or “Not concerned at all”. Life-space mobility was measured using  
11  
12 five questions from the life-space assessment (LSA) questionnaire <sup>26</sup>: “During the past 4 weeks have  
13  
14 you gone to: (1) other rooms in your home besides the room where you sleep? (2) An area outside  
15  
16 of your home as your porch, deck or patio, hallway or garage? (3) Different places in your  
17  
18 neighbourhood? (4) Locations outside of your neighbourhood, but within your city? and (5) places  
19  
20 outside your town?”. *Falls* data were collected as recommended by the Prevention of Falls Network  
21  
22 Europe, using a single question, “In the last 12 months, have you had any fall including a slip or trip  
23  
24 following which you have come to rest on the ground, floor or lower level?”<sup>27</sup>. Three possible  
25  
26 responses were available: not fallen, fallen once or more than once in the last year. *Frailty* was  
27  
28 measured by The Tilburg Frailty Indicator (TFI)<sup>28,29</sup>. It is composed of two parts. The first part describes  
29  
30 different determinants of frailty based on sociodemographic data and health related questions. The  
31  
32 second part contains 15 items which measure three frailty domains: physical (8 items), psychological  
33  
34 (4 items) and social (3 items). Frailty total scale and individual domain scores are derived from the  
35  
36 second part. All items are rated as a binary response of either 0 or 1. Scores are the sum of the  
37  
38 respective item points with a total score ranged from 0 to 15, with higher scores representing a higher  
39  
40 level of frailty. A total score  $\geq 5$  points indicates that the individual is frail<sup>28</sup>. *Health-Related Quality of*  
41  
42 *life (HRQoL)* was measured by the EuroQol-5D-5L (EQ-5D-5L) questionnaire, a generic measure of  
43  
44 HRQoL that includes five levels of functioning from level 1 (no problems) to level 5 (severe or extreme  
45  
46 problems)<sup>30,31</sup>. Additionally, respondents rated their current health status according to the EuroQol-  
47  
48 Visual Analog Scale (EQ-VAS), from 0 (worst imaginable health) to 100 (best imaginable health). The  
49  
50  
51  
52  
53  
54  
55  
56  
57  
58  
59  
60

1  
2  
3 responses from the five domains were converted into a single EQ-5D index value using the EQ-5D-5L  
4  
5 Crosswalk Index Value Calculator to produce a final QoL value<sup>32 33</sup>. The index values ranged between  
6  
7 -0.594 (a state worse than death) to 1 (best possible health state).  
8  
9

10  
11  
12  
13 New variables have been added to the follow up questionnaire (Table 1), allowing the cohort to be  
14  
15 used for a wider range of analytical approaches and purposes, and to dovetail to recruitment of new  
16  
17 clinical trials. The first follow up (Year 1) repeated baseline variables (Table 1) with the exception of  
18  
19 ethnicity, number of children, height, education, lifetime physical activity, main occupation during  
20  
21 lifetime, self-rating of strenuousness of occupation, and use of smart-phone or computer to access  
22  
23 the internet. Variables were also added, including presence, frequency, troublesome, location and  
24  
25 description of knee pain. The second wave of follow-up of data collection is collecting variables  
26  
27 included in previous wave (Year 1) in addition to difficulty balancing whilst walking and difficulty in  
28  
29 any of the following basic activities of daily living (ADL); bathing, transfers, toilet use, dressing and  
30  
31 eating. Each activity is rated from 'no difficulty' to 'Unable to perform'.  
32  
33  
34  
35  
36  
37  
38  
39

#### 40 *Characteristics of participating general practices*

41  
42 General practice deprivation and estimated proportion of non-white ethnic groups in the practice  
43  
44 population were obtained from Public Health England (PHE)<sup>34</sup>. Deprivation was measured by the  
45  
46 Index of Multiple Deprivation 2015 (IMD2015)<sup>35</sup>. Practice IMD scores are practice population  
47  
48 weighted based on the Lower Layer Super Output Areas (LSOAs) where the practice population  
49  
50 resides.  
51  
52  
53  
54  
55  
56  
57  
58  
59  
60

## **Data management and quality control**

All data are being processed and stored according to the Data Protection Act 2018. As the OPAL study started prior to the application of the General Data Protection Regulation (GDPR) 2018, all participants were sent an updated GDPR statement along with their next follow-up questionnaire.

A software application was developed to support the filtering and random sampling of individuals from the practice lists. Individual identifiable data were removed by the application. When eligible participants were selected, a unique screening number was allocated to each participant and given to the practice. Each general practice put invitation letters into the corresponding pre-numbered participant pack and completed the mail out.

The study office in Oxford receives returned questionnaires and the coordinating team undertake data quality checks. The returned questionnaires are processed using the electronic data capture software TeleForm Workgroup (Serial Number: 247885; Company name: ePartner Consulting Ltd), which includes internal system validation checks. Once questionnaires are scanned, additional validation is manually completed by a member of the OPAL study team. For example, if a questionnaire is returned with a double-page spread missing, the participant is contacted by telephone with a maximum of two attempts (on two separate days) in order to complete missing sections.

## **Access to electronic linkage**

The majority of OPAL participants (99.2% of those who agreed to participate; n=5,367/5,409) consented for the research team access their UK NHS Digital and primary health care records, and to be approached for future interventional and observational studies. NHS Digital is a national provider

1  
2  
3 of information, data and information technology systems for commissioners, analysts and clinicians  
4  
5 in health and social care. Information on hospital admissions, outpatient and accident and emergency  
6  
7 department visits for individuals receiving NHS hospital treatment in England<sup>36</sup>. Diagnoses are coded  
8  
9 using the World Organisation's (WHO) International Classification of Disease version 10 (ICD-10). In  
10  
11  
12  
13 addition, date and cause of death of death will be purchased.  
14  
15  
16  
17

### 18 **Patient and public involvement statement**

19  
20  
21 Patients and the public were involved in the development of the research question, the design of the  
22  
23 study, and the conduct of the research. We piloted and refined the OPAL cohort study questionnaires  
24  
25 with our Patient and Public Involvement (PPI) representatives including older adults for whom English  
26  
27 was a second language in order to ensure acceptability and assist with uptake of the study by ethnic  
28  
29 minority groups. We will also collaborate with our PPI representatives when drafting publications  
30  
31 and developing a strategy for dissemination to patients and the public.  
32  
33  
34  
35  
36  
37

### 38 **Ethics**

39  
40 Ethical approval for the study was provided by the London - Brent Research Ethics Committee  
41  
42 (16/LO/0348) on 10th March 2016. All participants provided written informed consent, returned with  
43  
44 the baseline questionnaire before being enrolled in the study.  
45  
46  
47  
48  
49  
50

### 51 **Statistical analysis**

52  
53 Descriptive statistics were used to summarize demographic and health-related measures of the OPAL  
54  
55 participants at baseline. Selected key demographic and health-related variables are reported in this  
56  
57 manuscript.  
58  
59  
60

1  
2  
3 To assess whether our cohort is representative of the population of England, we compared  
4 characteristics of the OPAL study to those in The English Longitudinal Study of Ageing (ELSA). We  
5 deliberately focus on absolute differences and not on statistical significance because the large study  
6 samples may produce low p-values even when absolute differences are small. Analyses were  
7 performed using STATA software V.15.1 (StataCorp).  
8  
9  
10  
11  
12  
13  
14  
15  
16  
17  
18

### 19 *The English Longitudinal Study of Ageing (ELSA)*

20 The ELSA study is a prospective study of a representative sample of community-dwelling people aged  
21 50 years or older living in England<sup>37</sup>. It started in 2002 (wave 1), with participants recruited from an  
22 annual cross-sectional survey of households who were followed up every two years. For this  
23 comparison, we used cross-sectional ELSA data from the core members (n=7,223) at wave eight (May  
24 2016-June 2017), as the time-period was comparable with the OPAL study at baseline. Members aged  
25 <65 years (n=2,102) and institutionalized (n=56) were excluded for the comparison. Thus, data from  
26 5,065 ELSA participants were included.  
27  
28  
29  
30  
31  
32  
33  
34  
35  
36  
37

38 We compared the following participant characteristics between ELSA and OPAL: demographic (age,  
39 sex, ethnicity (white vs. non-white), work status (retired vs. non-retired), current relationship status  
40 (married vs. non-married), weight, smoking status and health-related self-reported doctor-diagnosed  
41 chronic diseases (arthritis, diabetes, heart problems, stroke, dementia, lung disease, osteoporosis  
42 and high blood pressure)<sup>38</sup>. We applied the recommended weightings to the data to correct for non-  
43 response in ELSA cohort study<sup>39</sup>.  
44  
45  
46  
47  
48  
49  
50  
51

52 Further details of the variables used in OPAL and ELSA cohort studies are in Table S1 supplementary  
53 information. The ELSA data management is available in a Stata do-file  
54 "Data\_management\_wave8\_Dec2019.do" in supplementary information. The measurement  
55 protocol for the ELSA cohort study can be found at <http://www.ifs.org.uk/elsa>.  
56  
57  
58  
59  
60

## Findings to date

### Response

Eight thousand two hundred and forty individuals (64.2% amongst the 12,839 eligible participants) who were sent the invitation letter responded to the invitation, and 65.6% of them (n=5,409/8,240) agreed to participate in the study. Questionnaire response rate (amongst eligible individuals) by practice ranged from 5.1% to 65.8% (median: 45.6%; IQR: 32.2%-54.3%). Lower levels of response were observed in the most deprived practices (Supplementary Table S5)

OPAL baseline data has a low proportion of missing values. The amount of missing data for any single variable varied from 0.2% (n=13/5,409) (for relationship status and current work status) to 6.2% (n=335/5,409) (for Tilburg frailty score (0-15); item missing ranging from 0.4% to 1.9%).

### Characteristics of study participants at baseline

The demographic characteristics of participants are reported in Table 2. Half of the participants were women (51.5%; n=2,784/5,409), and the mean (SD) age was 74.9 (6.8) years, ranging from 65 to 100 years. The majority of study participants were white (94.9%; n=5,132/5,409).

The majority of participants were married or partnered (66.6%; n=3,602/5,409), with a higher proportion of women living alone. Most participants were retired (84.8%; n=4,589/5,409), and had secondary school education (56.4%; n= 3,051/5,409). The mean deprivation score of individuals (SD) was 16.6 (14.1) and it was similar between sexes. Women were less likely to report they were current smokers or drinking alcoholic beverages at least once every week than men. Prevalence of overweight and obesity was 38.1% (n=2,061/5,409) and 18.6% (n=1,005/5,409), respectively.

Health-related variables of men and women are described in Table 3 and Figure 2. A high proportion of participants (83.8%; n=4,530/5,409) reported pain in at least one body area in the previous six



1  
2  
3 weeks, with pain being more prevalent in women than men (Table 3). Low back pain was the most  
4 frequently reported site for pain (44.3%; n=2,397/5,409).  
5  
6

7  
8 The majority of participants were confident to walk half a mile (66.1%; n=3,577/5,409), with a higher  
9 proportion of men being confident walkers. Over thirty-eight percent (n=2,094/5,409) of participants  
10 rated their walking speed as strolling at an easy pace or very slow, 18.5% (n=1,002/5,409) reported  
11 using a walking aid inside or outside, and 25.5% (n=1,375/5,409) reported that their walking speed  
12 to be slower than a year ago. Over a quarter of participants (29.0%; n=1,569/5,409) reported having  
13 fallen once or more in the 12 months prior to the baseline questionnaire, and 27.1% (n=1,463/5,409)  
14 were frail. Frailty was more prevalent in women. Most of the participants reported good health  
15 across four domains of the EQ-5D-5L questions with 88.5% (n=4,784/5,409), 69.7% (n=3,772/5,409),  
16 66.1% (n=3,577/5,409) and 59.0% (n=3,190/5,409) reporting no problems with self-care,  
17 anxiety/depression, usual activities and mobility, respectively, except for pain/discomfort with a  
18 percentage of participants reporting no problems of 29.5% (n=1,594/5,409). The average HRQoL  
19 measured by EQ-5D-5L crosswalk value set and the EQ-VAS were 0.79 (SD 0.20) and 78.4 (SD 17.4),  
20 respectively. Women reported worse HRQoL (lower average score in both scales) compared with  
21 men (Table 3). The average self-reported EQ VAS score in population norms for UK population aged  
22 65-74 and 75 years and over<sup>40</sup> is broadly comparable to OPAL study (population norm vs. OPAL study:  
23 77.3 vs. 80.5 and 73.8 vs. 75.6, respectively).  
24  
25  
26  
27  
28  
29  
30  
31  
32  
33  
34  
35  
36  
37  
38  
39  
40  
41  
42  
43  
44  
45  
46  
47  
48  
49

50 The more frequently self-reported health condition was high blood pressure (45.5%; n=2,459/5,409),  
51 followed by arthritis (44.2%; n=2,391/5,409) and angina or heart problems (20.2%; n=1,094/5,409).  
52 High blood pressure was the most prevalent condition amongst men (47.4%; n=1,244/2,625), and  
53 arthritis the most prevalent in women (52.3%; 1,455/2,784) (Figure 2).  
54  
55  
56  
57  
58  
59  
60

### **Representativeness of OPAL Cohort study**

Supplementary Table S2, S3 and S4 show the sex-specific distribution of characteristics in OPAL and ELSA cohort studies across four age groups. Overall, OPAL participants were broadly comparable with those in the nationally representative ELSA cohort study.

There was a slightly higher proportion of men and a lower proportion of women in the 80 and older age group in OPAL study compared to ELSA study. Both men and women participants in the OPAL study were less likely to smoke and had a lower prevalence of self-reported heart problems, stroke and dementia.

### **Characteristics of included general practices**

General practice area deprivation and the estimated proportion of ethnic groups registered in the practice population are described in Supplementary Table S5. Of the 35 general practices included in the study, 32 had data available on PHE national general practice profiles website. Nine of 32 practices (28.1%) were classified among the most deprived practices (IMD deciles 1-3), 14/32 (43.8%) in the most affluent practices (IMD deciles 8-10) and the remainder categorised as moderate (n=9/32; 28.1%; IMD deciles 4-7).

### **Cohort multiple randomized controlled trial**

The first RCT utilizing the OPAL cohort study is now being undertaken. This trial is testing the effectiveness of a physiotherapist delivered combined physical and psychological intervention for older adults with neurogenic claudication compared to best practice advice (BOOST)<sup>41</sup>. The trial is registered with the International Standard Randomised Controlled Trials database, reference number ISRCTN12698674.

## Strengths and limitations

The original target for recruitment of the OPAL cohort study was a minimum of 4,000 older adults from 32 general practices. However, uptake was better than predicted and we have recruited 5,409 older adults from 35 general practices within nine distinct areas, providing good geographical coverage within England. The wide range of self-report health measures will allow us to account for a large range of potential mediating and confounding variables.

One important limitation of the cohort is the reliance upon self-reported data. However, we have written informed consent to access NHS Digital and primary health care data for the majority of the participants, to allow independent verification of diagnoses related to hospital admission and attendance, and as well as important elements of health service resource use and mortality. Participants living in most deprived neighbourhoods (based on practice deprivation) and non-white ethnicity groups were less likely to participate in OPAL (Supplementary Table S5), but nevertheless our population is broadly representative of the English population.

In terms of the representativeness of the OPAL study, characteristics of OPAL participants are similar to those in the ELSA study (Supplementary Table S2, S3 and S4). The selected variables for the comparison analysis had good comparability in both OPAL and ELSA studies, but there were some differences. For example, in ELSA, weight was calculated using measured weight, whereas in OPAL weight was self-reported. Self-reported weight tends to be underreported, particularly by women and those who are heaviest<sup>42</sup>. In addition, in ELSA, the definition of 'smoker status' and health conditions combines information from previous waves, whereas in OPAL study, only baseline information was used. This may have led to a slight underestimation of the difference between ELSA and OPAL in the percentage of 'ex-smoker' and individuals with the health condition.

## Future work

Data collection for the Year 1 follow-up questionnaire was completed in September 2019 and Year 2 and 3 follow-up will be completed in 2020 and 2021, respectively. We plan to administer questionnaires at annual intervals, and aim to continue this for a minimum of five years.

The potential of this data set has yet to be exploited and further work is in progress. We will start focusing on particular health domains (such as low back pain and mobility problems), together with an exploration of factors underlying the variability of those health domains. Future work will include the development of a prognostic tool to identify older adults at risk of mobility decline to help individuals, GPs and other health professionals identify risk factors and when these should be prioritised as a treatment target. This longitudinal cohort study will also identify health trajectories and will examine their associations with demographic, clinical, and social factors, with the aim of identifying factors that maintain good health and independence in older people.

## Where can I find out more?

Further information on the OPAL cohort study can be found on our website:

<https://www.ndorms.ox.ac.uk/rrio/opal>. Data will be available for data sharing. Enquires can be

made to Professor Sarah (Sallie) Lamb (Principal Investigator, e-mail: [sarah.lamb@ndorms.ox.ac.uk](mailto:sarah.lamb@ndorms.ox.ac.uk) /

[S.E.Lamb@exeter.ac.uk](mailto:S.E.Lamb@exeter.ac.uk)).

## OPAL Study Team

Conway O, Darton F, Dutton S, Garrett A, Hagan D, Haywood D, Hewitt A, Lamb S, Marian I, Morris A,

Nevay L, Nicolson P, Sanchez-Santos MT, Slark M, Vadher K, Ward L, Watson M, Williamson E, Arden

N, Barker K, Collins G, Fairbank J, Fitch J, French D, Griffiths F, Hanson Z, Hutchinson C, Mallen C,

Petrou S.

## OPAL General Practice Team

Grange Hill Surgery, Birmingham; Gosford Hill Medical Centre, Oxford; River Brook Medical Centre,

Birmingham; The Key Medical Practice, Oxford; Summertown Health Centre, Oxford; Alconbury and

Brampton Surgeries, Cambridgeshire; Old Exchange Surgery, Cambridgeshire; The Wand Medical

Centre, Birmingham; Kingsfield Medical Centre, Birmingham; Buckden and Little Paxton Surgery,

Cambridgeshire; Temple Cowley Medical Group, Oxford; Keynell Covert Surgery, Birmingham;

Burbury Medical Centre, Birmingham; Hollow Way Medical Centre, Oxford; Priory View Medical

Centre, Leeds; Newton Surgery, Leeds; Priory Fields Surgery, Cambridgeshire, Cromwell Place

Surgery, Cambridgeshire; Craven Road Medical Centre, Leeds; Queslett Medical Practice,

Birmingham; Hall Street Medical Centre, Saint Helens; Vauxhall Health Centre, Liverpool; Ireland

Wood Surgery, Leeds; Civic Medical Centre, Wirral; Brownlow Group Practice, Liverpool; Wareham

Surgery, Dorset; The Adam Practice, Poole; The Harvey Practice, Dorset; Three Chequers Medical

1  
2  
3 Practice, Salisbury; Gate Medical Centre, Birmingham; Rendcomb Surgery, Cirencester; Cotswold  
4  
5 Medical Practice, Cheltenham; Brigstock and South Norwood Partnership, Croydon; Portland  
6  
7  
8 Practice, Gloucestershire; Eversley Medical Centre, Croydon.  
9

## 10 11 12 13 **Supporting NIHR Clinical Research Networks (CRN)**

14  
15 Thames Valley and South Midlands, Eastern; Yorkshire and the Humber, North West Coast; Wessex,  
16  
17  
18 West of England; West Midlands, South London.  
19

## 20 21 22 23 **Competing interests**

24  
25 All authors have completed the Unified Competing Interest form at  
26  
27 [www.icmje.org/coi\\_disclosure.pdf](http://www.icmje.org/coi_disclosure.pdf). JB reports personal fees from Medtronic Ltd, grants from NIHR  
28  
29 HTA Funding, outside the submitted work. CM reports grants from NIHR, during the conduct of the  
30  
31 study. SL reports and declared competing interests of authors: Sarah E Lamb was on the Health  
32  
33 Technology Assessment (HTA) Additional Capacity Funding Board, HTA End of Life Care and Add-on  
34  
35 Studies Board, HTA Prioritisation Group Board and the HTA Trauma Board. All other authors declare  
36  
37  
38 no conflicts of interest.  
39  
40  
41  
42  
43  
44

## 45 46 47 **Funding**

48  
49 This research is funded by the NIHR Programme Grants for Applied Research (reference: PTC-RP-PG-  
50  
51 0213-20002). Preparatory work for the programme of research was supported by the NIHR  
52  
53 Collaborations for Leadership in Applied Health Research and Care (CLAHRC). Christian D. Mallen. is  
54  
55 funded by the National Institute for Health Research (NIHR) Applied Research Collaboration (West  
56  
57 Midlands), the NIHR School for Primary Care Research and an NIHR Research Professorship in General  
58  
59 Practice (NIHR-RP-2014-04-026). Julie Bruce is funded by NIHR Research Capability Funding..  
60

## Disclosure

The views expressed in this article are those of the authors and not necessarily those of the NHS, the NIHR, our funding bodies or the Department of Health and Social Care.

## Author contributions

MTSS participated in the data preparation, analysis, and interpretation; and the development and writing of the paper. EW participated in the OPAL study design, data collection and interpretation of the results of the paper. JB, LW and CM participated in the OPAL study design and interpretation of findings. AG and AM participated in the design of the OPAL study, data collection, data preparation and interpretation of findings. SL conceived the study, secured funding, and oversaw all aspects as principal investigator. SL participated in the design and execution of the OPAL study, and the development and writing of the paper. All authors contributed and approved the final manuscript.

## Acknowledgments

The authors would like to thank the individuals who participated in The Oxford Pain, Activity and Lifestyle (OPAL) cohort study, the general practitioners and their staff for assisting with the identification and invitation of eligible individuals and the NIHR Biomedical Research Centre, Oxford for funding this study (grant reference PTC-RP-PG-0213-20002).

## References

1. ONS. National population projections: 2016-based: Office for National Statistics; 2017 [Available from: <https://www.ons.gov.uk/releases/nationalpopulationprojections2016basedstatisticalbulletin> accessed 11/06/2019 2019.
2. Fried LP, Tangen CM, Walston J, et al. Frailty in older adults: evidence for a phenotype. *The journals of gerontology Series A, Biological sciences and medical sciences* 2001;56(3):M146-56. [published Online First: 2001/03/17]
3. Troutman-Jordan M, Staples J. Successful aging from the viewpoint of older adults. *Research and theory for nursing practice* 2014;28(1):87-104. [published Online First: 2014/04/30]
4. Parsons S, Gale CR, Kuh D, et al. Physical capability and the advantages and disadvantages of ageing: perceptions of older age by men and women in two British cohorts. *Ageing Soc* 2012;24(3):452-71. doi: <https://doi.org/10.1017/S0144686X12001067>
5. Hardy SE, Kang Y, Studenski SA, et al. Ability to walk 1/4 mile predicts subsequent disability, mortality, and health care costs. *Journal of general internal medicine* 2011;26(2):130-5. doi: 10.1007/s11606-010-1543-2 [published Online First: 2010/10/26]
6. Ward RE, Beauchamp MK, Latham NK, et al. A Novel Approach to Identifying Trajectories of Mobility Change in Older Adults. *PLoS one* 2016;11(12):e0169003. doi: 10.1371/journal.pone.0169003 [published Online First: 2016/12/23]
7. Woolf AD, Pfleger B. Burden of major musculoskeletal conditions. *Bulletin of the World Health Organization* 2003;81(9):646-56. [published Online First: 2004/01/09]
8. Global, regional, and national disability-adjusted life-years (DALYs) for 359 diseases and injuries and healthy life expectancy (HALE) for 195 countries and territories, 1990-2017: a systematic analysis for the Global Burden of Disease Study 2017. *Lancet* 2018;392(10159):1859-922. doi: 10.1016/s0140-6736(18)32335-3 [published Online First: 2018/11/13]
9. Fayaz A, Croft P, Langford RM, et al. Prevalence of chronic pain in the UK: a systematic review and meta-analysis of population studies. *BMJ open* 2016;6(6):e010364. doi: 10.1136/bmjopen-2015-010364 [published Online First: 2016/06/22]
10. Andorsen OF, Ahmed LA, Emaus N, et al. High prevalence of chronic musculoskeletal complaints among women in a Norwegian general population: the Tromso study. *BMC research notes* 2014;7:506. doi: 10.1186/1756-0500-7-506 [published Online First: 2014/08/12]
11. Eggermont LH, Leveille SG, Shi L, et al. Pain characteristics associated with the onset of disability in older adults: the maintenance of balance, independent living, intellect, and zest in the Elderly Boston Study. *J Am Geriatr Soc* 2014;62(6):1007-16. doi: 10.1111/jgs.12848 [published Online First: 2014/05/16]
12. Leveille SG, Jones RN, Kiely DK, et al. Chronic musculoskeletal pain and the occurrence of falls in an older population. *JAMA* 2009;302(20):2214-21. doi: 10.1001/jama.2009.1738
13. Whitlock EL, Diaz-Ramirez LG, Glymour MM, et al. Association Between Persistent Pain and Memory Decline and Dementia in a Longitudinal Cohort of Elders. *JAMA internal medicine* 2017;177(8):1146-53. doi: 10.1001/jamainternmed.2017.1622 [published Online First: 2017/06/07]
14. Chen Q, Hayman LL, Shmerling RH, et al. Characteristics of chronic pain associated with sleep difficulty in older adults: the Maintenance of Balance, Independent Living, Intellect, and Zest in the Elderly (MOBILIZE) Boston study. *J Am Geriatr Soc* 2011;59(8):1385-92. doi: 10.1111/j.1532-5415.2011.03544.x [published Online First: 2011/08/03]
15. Saraiva MD, Suzuki GS, Lin SM, et al. Persistent pain is a risk factor for frailty: a systematic review and meta-analysis from prospective longitudinal studies. *Age and ageing* 2018;47(6):785-93. doi: 10.1093/ageing/afy104 [published Online First: 2018/07/28]
16. Relton C, Torgerson D, O'Cathain A, et al. Rethinking pragmatic randomised controlled trials: introducing the "cohort multiple randomised controlled trial" design. *BMJ (Clinical research ed)* 2010;340:c1066. doi: 10.1136/bmj.c1066 [published Online First: 2010/03/23]
17. Clegg A, Relton C, Young J, et al. Improving recruitment of older people to clinical trials: use of the cohort multiple randomised controlled trial design. *Age and ageing* 2015;44(4):547-50. doi: 10.1093/ageing/afv044 [published Online First: 2015/04/11]



18. Bruce J, Lall R, Withers EJ, et al. A cluster randomised controlled trial of advice, exercise or multifactorial assessment to prevent falls and fractures in community-dwelling older adults: protocol for the prevention of falls injury trial (PreFIT). *BMJ open* 2016;6(1):e009362. doi: 10.1136/bmjopen-2015-009362 [published Online First: 2016/01/20]
19. Kuorinka I, Jonsson B, Kilbom A, et al. Standardised Nordic questionnaires for the analysis of musculoskeletal symptoms. *Applied ergonomics* 1987;18(3):233-7. [published Online First: 1987/09/01]
20. Parsons S, Breen A, Foster NE, et al. Prevalence and comparative troublesomeness by age of musculoskeletal pain in different body locations. *Family practice* 2007;24(4):308-16. doi: 10.1093/fampra/cmm027 [published Online First: 2007/07/03]
21. Deyo RA, Battie M, Beurskens AJ, et al. Outcome measures for low back pain research. A proposal for standardized use. *Spine (Phila Pa 1976)* 1998;23(18):2003-13. doi: 10.1097/00007632-199809150-00018 [published Online First: 1998/10/21]
22. Lamb SE, Lall R, Hansen Z, et al. A multicentred randomised controlled trial of a primary care-based cognitive behavioural programme for low back pain. The Back Skills Training (BeST) trial. *Health Technol Assess* 2010;14(41):1-253, iii-iv. doi: 10.3310/hta14410
23. de Schepper EI, Overvest GM, Suri P, et al. Diagnosis of Lumbar Spinal Stenosis: An Updated Systematic Review of the Accuracy of Diagnostic Tests. *Spine (Phila Pa 1976)* 2013;38(8):E469-E81. doi: 10.1097/BRS.0b013e31828935ac
24. Suri P, Rainville J, Kalichman L, et al. Does this older adult with lower extremity pain have the clinical syndrome of lumbar spinal stenosis? *JAMA* 2010;304(23):2628-36. doi: 10.1001/jama.2010.1833
25. Newell AM, VanSwearingen JM, Hile E, et al. The modified Gait Efficacy Scale: establishing the psychometric properties in older adults. *Physical therapy* 2012;92(2):318-28. doi: 10.2522/ptj.20110053 [published Online First: 2011/11/15]
26. Peel C, Sawyer Baker P, Roth DL, et al. Assessing mobility in older adults: the UAB Study of Aging Life-Space Assessment. *Physical therapy* 2005;85(10):1008-119. [published Online First: 2005/09/27]
27. Lamb SE, Jørstad-Stein EC, Hauer K, et al. Development of a common outcome data set for fall injury prevention trials: the Prevention of Falls Network Europe consensus. *J Am Geriatr Soc* 2005;53(9):1618-22. doi: 10.1111/j.1532-5415.2005.53455.x
28. Gobbens RJ, van Assen MA, Luijckx KG, et al. The Tilburg Frailty Indicator: psychometric properties. *Journal of the American Medical Directors Association* 2010;11(5):344-55. doi: 10.1016/j.jamda.2009.11.003
29. Gobbens RJ, van Assen MA, Luijckx KG, et al. Determinants of frailty. *Journal of the American Medical Directors Association* 2010;11(5):356-64. doi: 10.1016/j.jamda.2009.11.008 [published Online First: 2010/06/01]
30. Herdman M, Gudex C, Lloyd A, et al. Development and preliminary testing of the new five-level version of EQ-5D (EQ-5D-5L). *Qual Life Res* 2011;20(10):1727-36. doi: 10.1007/s11136-011-9903-x [published Online First: 2011/04/12]
31. Janssen MF, Pickard AS, Golicki D, et al. Measurement properties of the EQ-5D-5L compared to the EQ-5D-3L across eight patient groups: a multi-country study. *Qual Life Res* 2013;22(7):1717-27. doi: 10.1007/s11136-012-0322-4 [published Online First: 2012/11/28]
32. van Hout B, Janssen MF, Feng YS, et al. Interim scoring for the EQ-5D-5L: mapping the EQ-5D-5L to EQ-5D-3L value sets. *Value in health : the journal of the International Society for Pharmacoeconomics and Outcomes Research* 2012;15(5):708-15. doi: 10.1016/j.jval.2012.02.008 [published Online First: 2012/08/08]
33. EuroQol Group. EQ-5D 5L | Valuation: Standard value sets [Available from: <https://euroqol.org/eq-5d-instruments/eq-5d-5l-about/valuation-standard-value-sets/crosswalk-index-value-calculator/> accessed 17 December 2019.
34. Public Health England National general practice profiles [Available from: <http://fingertips.phe.org.uk/profile/general-practice/data> accessed August 2019.
35. Department for Communities and Local Government. The English Indices of Deprivation 2015. *In London: Department for Communities and Local Government* 2015

- 1
- 2
- 3
- 4 36. Digital N. Hospital Episode Statistics (HES) [11/06/2019]. Available from: <https://digital.nhs.uk/data-and-information/data-tools-and-services/data-services/hospital-episode-statistics>.
- 5
- 6 37. Clemens S, Phelps A, Oldfield Z, et al. English Longitudinal Study of Ageing: Waves 0-8, 1998-2017 2019 [30th Edition:]
- 7
- 8 38. Steptoe A, Breeze E, Banks J, et al. Cohort profile: the English longitudinal study of ageing. *International journal of epidemiology* 2013;42(6):1640-8. doi: 10.1093/ije/dys168 [published Online First: 2012/11/13]
- 9
- 10
- 11 39. Abell J, Amin-Smith N, Banks J, et al. The dynamics of ageing: evidence from the English Longitudinal Study of Ageing 2002-2016 (Wave 8): The Institute for Fiscal Studies 2018.
- 12
- 13 40. Janssen B, Szende A. Population Norms for the EQ-5D. In: Szende A, Janssen B, Cabases J, eds. Self-Reported Population Health: An International Perspective based on EQ-5D. Dordrecht (NL): Springer Copyright 2014, The Author(s). 2014:19-30.
- 14
- 15
- 16 41. Williamson E, Ward L, Vadher K, et al. Better Outcomes for Older people with Spinal Trouble (BOOST) Trial: a randomised controlled trial of a combined physical and psychological intervention for older adults with neurogenic claudication, a protocol. *BMJ open* 2018;8(10):e022205. doi: 10.1136/bmjopen-2018-022205 [published Online First: 2018/10/21]
- 17
- 18
- 19 42. Spencer EA, Appleby PN, Davey GK, et al. Validity of self-reported height and weight in 4808 EPIC-Oxford participants. *Public health nutrition* 2002;5(4):561-5. doi: 10.1079/phn2001322 [published Online First: 2002/08/21]
- 20
- 21
- 22 43. Banks J, Nazroo J, Steptoe A, editors. *Evidence from the English Longitudinal Study of Ageing 2002-2012 (Wave 6)*. London: The Institute for Fiscal Studies, 2014.
- 23
- 24
- 25 44. Banks J, Breeze E, Lessof C, et al. Retirement, health and relationships of the older population in England: The 2004 English Longitudinal Study of Ageing. *London: Institute for Fiscal Studies* 2006
- 26
- 27 45. Mottram S, Peat G, Thomas E, et al. Patterns of pain and mobility limitation in older people: cross-sectional findings from a population survey of 18,497 adults aged 50 years and over. *Qual Life Res* 2008;17(4):529-39. doi: 10.1007/s11136-008-9324-7
- 28
- 29
- 30 46. Driscoll T, Jacklyn G, Orchard J, et al. The global burden of occupationally related low back pain: estimates from the Global Burden of Disease 2010 study. *Annals of the rheumatic diseases* 2014;73(6):975-81. doi: 10.1136/annrheumdis-2013-204631 [published Online First: 2014/03/26]
- 31
- 32
- 33 47. Guralnik JM, Fried LP, Simonsick EM, et al. The Women's Health and Aging Study: Health and Social Characteristics of Older Women with Disability. Bethesda, MD: National Institute of Aging, 1995.
- 34
- 35
- 36 48. Shuval K, Kohl HW, 3rd, Bernstein I, et al. Sedentary behaviour and physical inactivity assessment in primary care: the Rapid Assessment Disuse Index (RADI) study. *British journal of sports medicine* 2014;48(3):250-5. doi: 10.1136/bjsports-2013-092901 [published Online First: 2013/10/23]
- 37
- 38 49. Rose SB, Elley CR, Lawton BA, et al. A single question reliably identifies physically inactive women in primary care. *The New Zealand medical journal* 2008;121(1268):U2897. [published Online First: 2008/02/08]
- 39
- 40 50. Buysse DJ, Reynolds CF, 3rd, Monk TH, et al. The Pittsburgh Sleep Quality Index: a new instrument for psychiatric practice and research. *Psychiatry research* 1989;28(2):193-213. [published Online First: 1989/05/01]
- 41
- 42
- 43 51. Collin C, Wade DT, Davies S, et al. The Barthel ADL Index: a reliability study. *International disability studies* 1988;10(2):61-3. [published Online First: 1988/01/01]
- 44
- 45 52. Gompertz P, Pound, P., & Ebrahim, S. A postal version of the Barthel Index. *Clinical Rehabilitation*, 8(3), 233-239. *Clinical Rehabilitation* 1994;8(3):233-39.
- 46
- 47 53. Von Korff M, Ormel J, Keefe F, et al. Grading the severity of chronic pain. *Pain* 1992;50(2):133-49.
- 48
- 49 54. Syddall HE, Westbury LD, Cooper C, et al. Self-reported walking speed: a useful marker of physical performance among community-dwelling older people? *Journal of the American Medical Directors Association* 2015;16(4):323-8. doi: 10.1016/j.jamda.2014.11.004 [published Online First: 2014/12/20]
- 50
- 51 55. Chung J, Demiris G, Thompson HJ. Instruments to assess mobility limitation in community-dwelling older adults: a systematic review. *Journal of aging and physical activity* 2015;23(2):298-313. doi: 10.1123/japa.2013-0181 [published Online First: 2014/03/05]
- 52
- 53
- 54
- 55
- 56
- 57
- 58
- 59
- 60

- 1  
2  
3 56. Pinto E, Peters R. Literature review of the Clock Drawing Test as a tool for cognitive screening. *Dement*  
4 *Geriatr Cogn Disord* 2009;27(3):201-13. doi: 10.1159/000203344  
5  
6 57. Laidlaw K, Power MJ, Schmidt S. The Attitudes to Ageing Questionnaire (AAQ): development and  
7 psychometric properties. *International journal of geriatric psychiatry* 2007;22(4):367-79. doi:  
8 10.1002/gps.1683 [published Online First: 2006/10/20]  
9  
10  
11  
12  
13  
14  
15  
16  
17  
18  
19  
20  
21  
22  
23  
24  
25  
26  
27  
28  
29  
30  
31  
32  
33  
34  
35  
36  
37  
38  
39  
40  
41  
42  
43  
44  
45  
46  
47  
48  
49  
50  
51  
52  
53  
54  
55  
56  
57  
58  
59  
60

For peer review only

## Tables and Figures

**Figure 1.** Locations of the areas from which the OPAL Cohort Study was derived. Map of England divided by counties.

**Figure 2.** Health conditions in men and women of OPAL Cohort Study

For peer review only

**Table 1.** Measures included in the OPAL Cohort Study

| Data collection for the OPAL Cohort Study |                                                                                                                                                                                                                                                                                                                           |           |
|-------------------------------------------|---------------------------------------------------------------------------------------------------------------------------------------------------------------------------------------------------------------------------------------------------------------------------------------------------------------------------|-----------|
| Domain measured                           | Self-reported measure                                                                                                                                                                                                                                                                                                     | Years (Y) |
| Socio-demographic                         | Age, sex, education, relationship status<br>Participation in clubs and groups <sup>43</sup><br>Requires unpaid/paid carer                                                                                                                                                                                                 | Y0-Y5     |
|                                           | Ethnicity<br>Number of live births and stillbirths                                                                                                                                                                                                                                                                        | Y0        |
| Socio-economic                            | Participant and GP Area deprivation obtained from postcodes <sup>35</sup><br>Current work status <sup>44</sup><br>Type of housing<br>Adequacy of income <sup>45</sup>                                                                                                                                                     | Y0-Y5     |
|                                           | Main occupation during lifetime <sup>46</sup> and self-rating of strenuousness of occupation<br>Internet access                                                                                                                                                                                                           | Y0        |
| Lifestyle                                 | Weight<br>Alcohol and smoking <sup>47</sup><br>Current physical activity <sup>48</sup>                                                                                                                                                                                                                                    | Y0-Y5     |
|                                           | Height<br>Lifetime physical activity <sup>49</sup>                                                                                                                                                                                                                                                                        | Y0        |
| General health data                       | Self-reported comorbidities and medication use<br>Sleep quality - Pittsburgh Sleep Quality Index <sup>50</sup> and average number of hours sleep each night<br>Incontinence - 2 items from Barthel Index <sup>51 52</sup><br>Falls in the last 12 months <sup>27</sup><br>Broken bones or fractures in the last 12 months | Y0-Y5     |
| Musculoskeletal pain                      | The Nordic pain questionnaire adapted version <sup>19 20</sup>                                                                                                                                                                                                                                                            | Y0-Y5     |
|                                           | Report of back pain in last 6 weeks, troublesomeness, onset of back pain and nature of back pain <sup>22</sup><br>Leg pain and symptoms related to low back pain<br>Screening questions for neurogenic claudication <sup>23</sup>                                                                                         | Y0-Y5     |
|                                           | Report of knee pain, troublesomeness, interference with daily activity <sup>53</sup>                                                                                                                                                                                                                                      | Y1-Y2     |

| Data collection for the OPAL Cohort Study |                                                                                                                                                                                                                                                                                                               |           |
|-------------------------------------------|---------------------------------------------------------------------------------------------------------------------------------------------------------------------------------------------------------------------------------------------------------------------------------------------------------------|-----------|
| Domain measured                           | Self-reported measure                                                                                                                                                                                                                                                                                         | Years (Y) |
|                                           | Location of knee pain                                                                                                                                                                                                                                                                                         | Y1        |
| Mobility                                  | Change in mobility in the last year.<br>Self-rated walking speed <sup>54</sup><br>Use of walking aids (inside and outside)<br>Mobility concerns<br>Access to transport <sup>43</sup><br>Life-Space assessment <sup>26</sup><br>Single item from the Modified Gait Self-Efficacy Scale (10-item) <sup>25</sup> | Y0-Y5     |
|                                           | Difficulty with balance while walking                                                                                                                                                                                                                                                                         | Y2-Y5     |
|                                           | Difficulties walking a half of mile <sup>55</sup><br>Difficulties walking up and down a flight of stairs <sup>55</sup>                                                                                                                                                                                        | Y3-Y5     |
| Disability                                | Self-reported difficulty with Activities of Daily Living (bathing, transfers, toilet use, dressing and eating)                                                                                                                                                                                                | Y2-Y5     |
| Frailty                                   | Tilburg Frailty Index <sup>28 29</sup>                                                                                                                                                                                                                                                                        | Y0-Y5     |
| Cognition                                 | Clock Drawing Test <sup>56</sup>                                                                                                                                                                                                                                                                              | Y0-Y5     |
| Beliefs about ageing                      | Attitude to ageing questionnaire – physical changes subscale <sup>57</sup>                                                                                                                                                                                                                                    | Y0-Y5     |
| Health related quality of life            | EuroQol 5-Dimension Health Questionnaire, five-level version <sup>30</sup><br>EuroQol-Visual Analog Scale (EQ-VAS) <sup>30</sup>                                                                                                                                                                              | Y0-Y5     |

**Table 2.** Sociodemographic and life-style factors of men and women in the OPAL Cohort Study

| Characteristic                      | Men (n=2,625) | Women (n=2,784) |
|-------------------------------------|---------------|-----------------|
| Age, mean (SD)                      | 74.8 (6.7)    | 75.0 (6.8)      |
| Age groups, n (%)                   |               |                 |
| 65-69                               | 784 (29.9)    | 801 (28.8)      |
| 70-74                               | 696 (26.5)    | 734 (26.4)      |
| 75-79                               | 542 (20.7)    | 618 (22.2)      |
| 80-84                               | 355 (13.5)    | 356 (12.8)      |
| 85-89                               | 196 (7.5)     | 203 (7.3)       |
| 90+                                 | 52 (2.0)      | 72 (2.6)        |
| Ethnicity (White), n (%)            | 2,465 (93.9)  | 2,667 (95.8)    |
| Relationship status, n (%)          |               |                 |
| Married/Civil Union                 | 1,897 (72.3)  | 1,506 (54.1)    |
| Living with Partner                 | 114 (4.3)     | 85 (3.1)        |
| Unmarried (never married)           | 117 (4.5)     | 105 (3.8)       |
| Separated/Divorced                  | 185 (7.1)     | 273 (9.8)       |
| Widow/Widower                       | 305 (11.6)    | 809 (29.1)      |
| Live alone, n (%)                   | 534 (20.3)    | 1,021 (36.7)    |
| Education, n (%)                    |               |                 |
| High professional or university     | 1,017 (38.7)  | 895 (32.2)      |
| Secondary school only               | 1,370 (52.2)  | 1,681 (60.4)    |
| None or primary                     | 219 (8.3)     | 189 (6.8)       |
| Work status (Retired), n (%)        | 2,187 (83.3)  | 2,402 (86.3)    |
| Quintiles of IMD, n (%)             |               |                 |
| Q1 – Most deprived                  | 293 (11.2)    | 289 (10.4)      |
| Q2                                  | 323 (12.3)    | 339 (12.2)      |
| Q3                                  | 542 (20.7)    | 613 (22.0)      |
| Q4                                  | 575 (21.9)    | 591 (21.2)      |
| Q5 – Least deprived                 | 892 (34.0)    | 952 (34.2)      |
| BMI (kg/m <sup>2</sup> ), mean (SD) | 26.8 (4.3)    | 26.4 (5.3)      |
| Smoking status, n (%)               |               |                 |
| Never                               | 1,069 (40.7)  | 1,608 (57.8)    |
| Ex-Smoker                           | 1,400 (53.3)  | 1,039 (37.3)    |
| Current                             | 145 (5.5)     | 118 (4.2)       |
| Cigarettes per day, median (IQR)    | 15 (10-20)    | 10 (5-17)       |
| Alcohol intake once per week, n (%) | 1,861 (70.9)  | 1,361 (48.9)    |

SD=standard deviation; IMD=Index of Multiple Deprivation. Data included older adults 65 years and older at baseline 2016-2018.

**Table 3.** Health-related characteristics of men and women at the OPAL Cohort Study

| Health-related characteristics                      | Men (n=2,625)  | Women (n=2,784) |
|-----------------------------------------------------|----------------|-----------------|
| <b>Pain in the last 6 weeks, n (%)</b>              |                |                 |
| Low back (small of the back)                        | 1,096 (41.8)   | 1,301 (46.7)    |
| One of both knees                                   | 930 (35.4)     | 1,123 (40.3)    |
| Wrist/hands                                         | 653 (24.9)     | 1,047 (37.6)    |
| Neck                                                | 673 (25.6)     | 949 (34.1)      |
| Shoulders                                           | 665 (25.3)     | 943 (33.9)      |
| One of both hips/thighs                             | 597 (22.7)     | 873 (31.4)      |
| One or both ankles/feet                             | 559 (21.3)     | 752 (27.0)      |
| Upper back                                          | 160 (6.1)      | 344 (12.4)      |
| Elbows                                              | 160 (6.1)      | 171 (6.1)       |
| Any pain, n (%)                                     | 2,135 (81.3)   | 2,395 (86.0)    |
| <b>Mobility</b>                                     |                |                 |
| Confidence to walk half a mile, median (IQR)        | 10 (9-10)      | 10 (6-10)       |
| Outdoor walking pace, n (%)                         |                |                 |
| Fast                                                | 91 (3.5)       | 93 (3.3)        |
| Fairly brisk                                        | 534 (20.3)     | 572 (20.6)      |
| Normal                                              | 994 (37.9)     | 958 (34.4)      |
| stroll at an easy pace                              | 647 (24.7)     | 726 (26.1)      |
| Very slow                                           | 326 (12.4)     | 395 (14.2)      |
| Unable to walk                                      | 19 (0.7)       | 27 (1.0)        |
| Walking rate than 1 year ago, n (%)                 |                |                 |
| Much better                                         | 52 (2.0)       | 84 (3.0)        |
| Somewhat better                                     | 114 (4.3)      | 101 (3.6)       |
| About the same                                      | 1,822 (69.4)   | 1,831 (65.8)    |
| Somewhat worse                                      | 507 (19.3)     | 622 (22.3)      |
| Much worse                                          | 113 (4.3)      | 133 (4.8)       |
| Walking aid use inside (Yes), n (%)                 | 108 (4.1)      | 153 (5.5)       |
| Walking aid use outside (Yes), n (%)                | 306 (11.7)     | 435 (15.6)      |
| <b>Falls in the last year, n (%)</b>                |                |                 |
| None                                                | 1,900 (72.4)   | 1,906 (68.5)    |
| One fall                                            | 474 (18.1)     | 624 (22.4)      |
| More than one fall                                  | 235 (9.0)      | 236 (8.5)       |
| <b>Frailty, Tilburg frailty score, median (IQR)</b> | <b>2 (1-4)</b> | <b>3 (1-5)</b>  |
| <b>Quality of life</b>                              |                |                 |
| EQ-5D crosswalk index value, mean (SD)              | 0.79 (0.19)    | 0.76 (0.21)     |
| EQ-VAS, mean (SD)                                   | 79.1 (16.7)    | 77.7 (18.0)     |

Sample sizes may vary due to missing values; data included older adults 65 years and older at baseline 2016-2018.



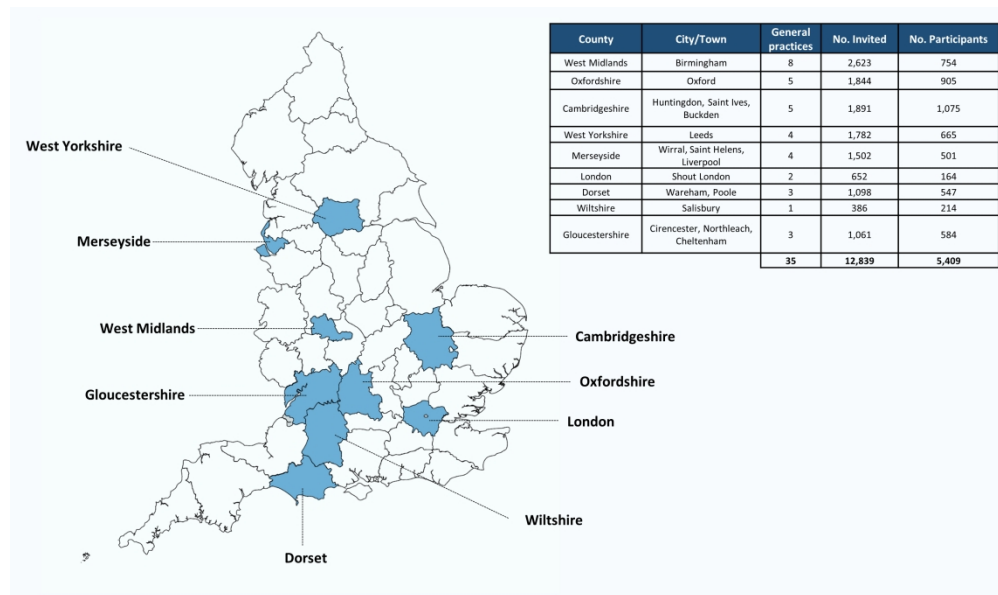

26 Locations of the areas from which the OPAL Cohort Study was derived. Map of England divided by counties

27  
28 270x160mm (300 x 300 DPI)

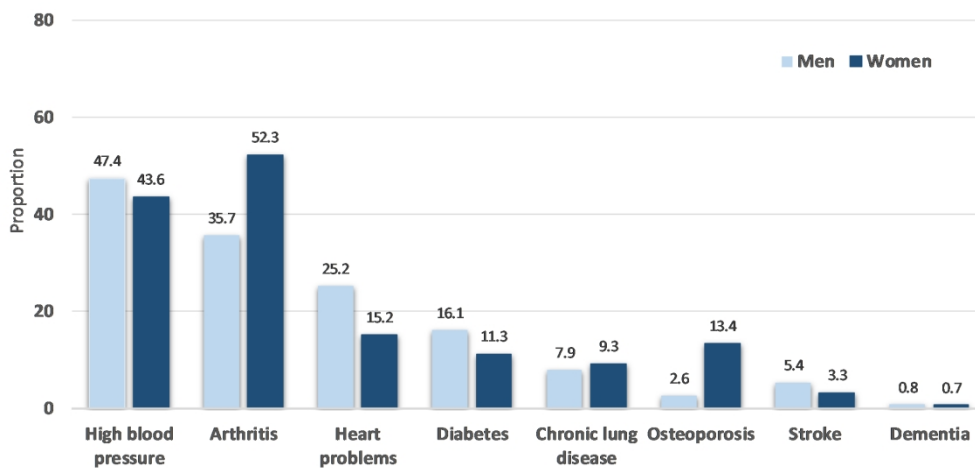

Health conditions in men and women of OPAL Cohort Study

196x101mm (300 x 300 DPI)

## Supplementary Data

**Supplemental Table S1.** Variables used in the OPAL and the ELSA cohort studies.

| Variable            | Question(s), answer(s) posed to OPAL study                                                                                                                                       | Question(s), answer(s) posed to ELSA study                                                                                                                                                                                                            | Name (label) of the variable used for the comparison study                                           |
|---------------------|----------------------------------------------------------------------------------------------------------------------------------------------------------------------------------|-------------------------------------------------------------------------------------------------------------------------------------------------------------------------------------------------------------------------------------------------------|------------------------------------------------------------------------------------------------------|
| age                 | Date of birth and date of completion of questionnaire                                                                                                                            | Age in 5 year bands <ul style="list-style-type: none"> <li>• 65-69</li> <li>• 70-74</li> <li>• 75-79</li> <li>• 80-84</li> <li>• 85+</li> </ul>                                                                                                       | 'ageg5' (Age variable in 5 year bands)<br>(Derived variable from Institute for fiscal studies (IFS)) |
| Sex                 | Gender: Male and Female                                                                                                                                                          | Sex: Male and Female                                                                                                                                                                                                                                  | 'indsex' (Sex variable)                                                                              |
| Ethnicity           | To which of these ethnic groups do you consider you belong? <ul style="list-style-type: none"> <li>• White British or white other</li> </ul>                                     | To which of the groups on this card do you consider that you belong? <ul style="list-style-type: none"> <li>• White</li> </ul>                                                                                                                        | 'fqethnmr' (Ethnicity recoded into white and non-white (consolidated))                               |
| Work status         | Which of the following best describes your CURRENT work status? <ul style="list-style-type: none"> <li>• Retired</li> </ul>                                                      | Which of the following best describes your CURRENT work status? <ul style="list-style-type: none"> <li>• Retired</li> </ul>                                                                                                                           | 'wpdes' (Best description of current situation)                                                      |
| Relationship status | What is your current relationship status? <ul style="list-style-type: none"> <li>• Married/Civil Union</li> </ul>                                                                | What is your current legal marital status? <ul style="list-style-type: none"> <li>• Married/Civil partner</li> </ul>                                                                                                                                  | 'dimarr' (Marital status - combined marriage/civil partnership)                                      |
| Weight              | What is your weight? <ul style="list-style-type: none"> <li>• In Kilograms</li> </ul>                                                                                            | Weight measurement <ul style="list-style-type: none"> <li>• In Kilograms</li> </ul> Note: Participants with weight of 37 kg or lower were excluded from the analysis of this variable (n=282) due to the lowest cut-off used in the OPAL cohort study | 'estwt' (Final measured or estimated weight (kg))                                                    |
| Smoking status      | Which of the following describes your current cigarette smoking status? <ul style="list-style-type: none"> <li>• Never</li> <li>• Ex-smoker</li> <li>• Current smoker</li> </ul> | Smoker status (past or present): <ul style="list-style-type: none"> <li>• Never</li> <li>• Ex-smoker</li> <li>• Current smoker</li> </ul>                                                                                                             | 'smokerstat' (Derived variable from IFS (non-financial))                                             |

| Variable                         | Question(s), answer(s) posed to OPAL study                                                   | Question(s), answer(s) posed to ELSA study                                                                                                                                                                                                                                                                          | Name (label) of the variable used for the comparison study                                                                                                                                                                                                                                                                                                                      |
|----------------------------------|----------------------------------------------------------------------------------------------|---------------------------------------------------------------------------------------------------------------------------------------------------------------------------------------------------------------------------------------------------------------------------------------------------------------------|---------------------------------------------------------------------------------------------------------------------------------------------------------------------------------------------------------------------------------------------------------------------------------------------------------------------------------------------------------------------------------|
| <i>Chronic health conditions</i> | <i>Has your doctor or nurse ever told you that you have any of the following conditions?</i> | <p><i>Our records show that in the last interview you said that you had been told by a doctor that you had any of the following conditions.</i></p> <p><i>Do you still have the condition?</i></p> <p><i>Since last interview, has a doctor ever told you that you have any of the conditions on this card?</i></p> | <p><i>Diagnosed last interview AND confirms previous chronic condition</i></p> <p><i>OR</i></p> <p><i>Chronic condition since last interview</i></p>                                                                                                                                                                                                                            |
| Heart problems                   | <ul style="list-style-type: none"> <li>• Angina or heart troubles</li> </ul>                 | <ul style="list-style-type: none"> <li>• Angina</li> <li>• A heart attack (including myocardial infarction or coronary thrombosis)</li> <li>• Congestive heart failure</li> <li>• A heart murmur</li> <li>• An abnormal heart rhythm</li> <li>• Any other heart trouble</li> </ul>                                  | <p><i>Angina: 'hedawan', 'hedacan', 'hediman'</i></p> <p><i>Heart attach: 'hedawmi', 'hedacmi', 'hedimmi'</i></p> <p><i>Congestion heart failure: 'hedawhf', 'hedachf', 'hedimhf'</i></p> <p><i>Heart murmur: 'hedawhm', 'hedachm', 'hedimhm'</i></p> <p><i>Abnormal heart rhythm: 'hedawar', 'hedacar', 'hedimar'</i></p> <p><i>Other: 'hedaw95', 'hedac95', 'hedia95'</i></p> |
| Diabetes                         | <ul style="list-style-type: none"> <li>• Diabetes (Types I or II)</li> </ul>                 | <ul style="list-style-type: none"> <li>• Diabetes or high blood sugar</li> </ul>                                                                                                                                                                                                                                    | <p><i>'hedawdi', 'hedacdi', 'hedimdi'</i></p>                                                                                                                                                                                                                                                                                                                                   |
| High blood pressure              | <ul style="list-style-type: none"> <li>• High blood pressure</li> </ul>                      | <ul style="list-style-type: none"> <li>• High blood pressure or hypertension</li> </ul>                                                                                                                                                                                                                             | <p><i>'hedawbp', 'hedacbp', 'hedimbp'</i></p>                                                                                                                                                                                                                                                                                                                                   |
| Stroke                           | <ul style="list-style-type: none"> <li>• Stroke</li> </ul>                                   | <ul style="list-style-type: none"> <li>• A stroke (cerebral vascular disease)</li> </ul>                                                                                                                                                                                                                            | <p><i>'hedawst', 'hedacst', 'hedimst'</i></p>                                                                                                                                                                                                                                                                                                                                   |
| Arthritis                        | <ul style="list-style-type: none"> <li>• Arthritis</li> </ul>                                | <ul style="list-style-type: none"> <li>• Arthritis (including osteoarthritis, or rheumatism)</li> </ul>                                                                                                                                                                                                             | <p><i>'hedbwar', 'hedbdar', 'hedibar'</i></p>                                                                                                                                                                                                                                                                                                                                   |
| Dementia                         | <ul style="list-style-type: none"> <li>• Dementia</li> </ul>                                 | <ul style="list-style-type: none"> <li>• Dementia, senility, or any other serious memory impairment</li> </ul>                                                                                                                                                                                                      | <p><i>'hedbwde', 'hedbdde', 'hedibde'</i></p>                                                                                                                                                                                                                                                                                                                                   |

| Variable             | Question(s), answer(s) posed to OPAL study                                       | Question(s), answer(s) posed to ELSA study                                                                                     | Name (label) of the variable used for the comparison study                                                            |
|----------------------|----------------------------------------------------------------------------------|--------------------------------------------------------------------------------------------------------------------------------|-----------------------------------------------------------------------------------------------------------------------|
| Osteoporosis         | <ul style="list-style-type: none"> <li>Osteoporosis</li> </ul>                   | <ul style="list-style-type: none"> <li>Osteoporosis, sometimes called thin or brittle bones</li> </ul>                         | 'hedbwos', 'hedbdos', 'hedibos'                                                                                       |
| Chronic lung disease | <ul style="list-style-type: none"> <li>Chronic lung disease or Asthma</li> </ul> | <ul style="list-style-type: none"> <li>Chronic lung disease such as chronic bronchitis or emphysema</li> <li>Asthma</li> </ul> | <i>Chronic lung disease:</i><br>'hedbwlu', 'hedbdlu', 'hediblu'<br><br><i>Asthma:</i> 'hedbwas', 'hedbdas', 'hedibas' |

**Supplemental Table S2.** Sex-distribution in the OPAL and ELSA cohort studies by age groups

|                     | OPAL (Observed %) |       |       |       | ELSA (Estimated % [95%CI]) |                  |                  |                  |
|---------------------|-------------------|-------|-------|-------|----------------------------|------------------|------------------|------------------|
|                     | 65-69             | 70-74 | 75-79 | 80+   | 65-69                      | 70-74            | 75-79            | 80+              |
| Sex                 |                   |       |       |       |                            |                  |                  |                  |
| Female              | 50.5              | 51.3  | 53.3  | 51.1  | 51.6 [48.9-54.2]           | 52.2 [49.4-55.1] | 53.8 [50.5-57.0] | 58.8 [55.8-61.8] |
| Male                | 49.5              | 48.7  | 46.7  | 48.9  | 48.5 [45.8-51.1]           | 47.8 [44.9-50.6] | 46.2 [43.0-49.5] | 41.2 [38.3-44.2] |
| <i>Unweighted N</i> | 1,585             | 1,430 | 1,160 | 1,234 | 1,547                      | 1,303            | 992              | 1,223            |

ELSA=The English Longitudinal Study of Ageing, a national probability sample of non-institutionalised older people. Wave 8 (2016-2017) was used for this analysis. For variable definitions, see Supplemental Table S1 and for ELSA data management, see Stata do-file "Data\_management\_wave8\_Dec2019.do". Data were weighted to correct for non-response in the ELSA cohort study.

**Supplemental Table S3.** Characteristics of **women** in the OPAL and ELSA cohort studies by age groups

| Characteristics        | OPAL (Observed %) |             |             |             | ELSA (Estimated % [95%CI]) |                  |                  |                  |
|------------------------|-------------------|-------------|-------------|-------------|----------------------------|------------------|------------------|------------------|
|                        | 65-69             | 70-74       | 75-74       | 80+         | 65-69                      | 70-74            | 75-74            | 80+              |
| Ethnicity, White       | 95.1              | 95.5        | 95.6        | 97.2        | 96.7 [95.1-97.8]           | 97.6 [96.0-98.6] | 97.5 [95.0-98.8] | 97.3 [95.4-98.5] |
| Relationship status    |                   |             |             |             |                            |                  |                  |                  |
| Married/Civil Union    | 66.0              | 62.5        | 52.4        | 30.7        | 69.0 [65.8-72.1]           | 64.6 [60.8-68.2] | 54.9 [50.4-59.2] | 30.1 [26.6-33.9] |
| Work status, Retired   | 75.9              | 87.3        | 92.7        | 91.9        | 77.3 [74.2-80.0]           | 88.5 [85.7-90.8] | 90.2 [87.3-92.6] | 93.2 [91.1-94.9] |
| Weight (kg), mean (SD) | 70.7 (14.8)       | 69.7 (14.7) | 68.4 (13.1) | 65.2 (13.0) | 73.9 [72.8-75.1]           | 72.8 [71.5-74.1] | 70.3 [69.0-71.6] | 66.2 [65.0-67.4] |
| Smoking status,        |                   |             |             |             |                            |                  |                  |                  |
| Ex-Smoker              | 38.3              | 40.2        | 35.3        | 34.7        | 46.7 [43.3-50.2]           | 56.8 [52.9-60.7] | 49.8 [45.3-54.2] | 53.5 [49.5-57.4] |
| Current                | 5.2               | 4.8         | 5.0         | 1.6         | 11.6 [9.5-14.1]            | 9.1 [7.0-11.8]   | 7.1 [4.9-10.1]   | 3.9 [2.6-5.9]    |
| Health conditions,     |                   |             |             |             |                            |                  |                  |                  |
| Heart problems         | 8.6               | 12.4        | 15.7        | 27.7        | 18.5 [16.0-21.4]           | 21.2 [18.1-24.6] | 25.7 [22.0-29.7] | 34.3 [30.6-38.2] |
| Diabetes               | 8.7               | 11.3        | 11.5        | 14.3        | 11.4 [9.3-13.8]            | 14.1 [11.6-17.1] | 13.4 [10.6-16.7] | 16.9 [14.1-20.2] |
| High Blood pressure    | 32.5              | 42.4        | 48.7        | 54.4        | 36.5 [33.2-39.9]           | 41.3 [37.5-45.3] | 50.7 [46.2-55.1] | 57.6 [53.6-61.4] |
| Stroke                 | 2.1               | 2.2         | 2.9         | 6.7         | 3.3 [2.3-4.8]              | 4.3 [2.9-6.2]    | 7.8 [5.7-10.6]   | 11.2 [9.0-13.9]  |
| Arthritis              | 45.6              | 51.8        | 55.0        | 58.6        | 49.9 [46.4-53.3]           | 54.3 [50.4-58.2] | 58.3 [53.8-62.6] | 62.4 [58.4-66.1] |
| Dementia               | 0.1               | 0.3         | 0.7         | 1.7         | 0.3 [0.1-1.1]              | 1.5 [0.8-2.8]    | 1.5 [0.7-3.2]    | 5.7 [4.1-7.8]    |
| Osteoporosis           | 9.7               | 11.0        | 15.2        | 19.2        | 13.6 [11.4-16.2]           | 18.1 [15.2-21.4] | 16.8 [13.8-20.4] | 21.2 [18.2-24.6] |
| Chronic lung disease   | 10.1              | 9.4         | 10.2        | 7.1         | 6.8 [5.3-8.8]              | 8.2 [6.3-10.7]   | 8.7 [6.4-11.7]   | 6.1 [4.6-8.2]    |
| <i>Unweighted N</i>    | 801               | 734         | 618         | 631         | 888                        | 679              | 534              | 720              |

ELSA=The English Longitudinal Study of Ageing, a national probability sample of non-institutionalised older people. Wave 8 (2016-2017) was used for this analysis. For variable definitions, see Supplemental Table S1 and for ELSA data management, see Stata do-file "Data\_management\_wave8\_Dec2019.do". Data were weighted to correct for non-response in the ELSA cohort study

**Supplemental Table S4.** Characteristics of men in the OPAL and ELSA cohort studies by age groups

| Characteristics        | OPAL (Observed %) |             |             |             | ELSA (Estimated % [95%CI]) |                  |                  |                  |
|------------------------|-------------------|-------------|-------------|-------------|----------------------------|------------------|------------------|------------------|
|                        | 65-69             | 70-74       | 75-74       | 80+         | 65-69                      | 70-74            | 75-74            | 80+              |
| Ethnicity, White       | 92.9              | 95.1        | 93.7        | 94.0        | 96.9 [94.8-98.1]           | 96.2 [93.9-97.6] | 97.9 [95.7-99.0] | 96.6 [94.3-98.0] |
| Relationship status    |                   |             |             |             |                            |                  |                  |                  |
| Married/Civil Union    | 75.8              | 75.9        | 72.1        | 63.7        | 76.5 [72.9-79.8]           | 78.0 [74.3-81.2] | 72.6 [68.1-76.7] | 64.2 [59.6-68.6] |
| Work status, Retired   | 71.1              | 81.8        | 90.6        | 94.5        | 74.1 [70.5-77.5]           | 88.0 [85.2-90.4] | 93.9 [91.3-95.8] | 97.3 [95.4-98.4] |
| Weight (kg), mean (SD) | 85.0 (15.6)       | 83.7 (15.4) | 81.5 (13.8) | 78.1 (12.6) | 87.3 [86.0-88.7]           | 84.5 [83.1-85.8] | 81.6 [80.3-83.0] | 78.6 [77.3-79.8] |
| Smoking status,        |                   |             |             |             |                            |                  |                  |                  |
| Ex-Smoker              | 49.0              | 54.0        | 55.4        | 56.4        | 61.8 [57.8-65.6]           | 64.0 [59.9-67.9] | 66.9 [62.2-71.3] | 75.0 [70.8-78.7] |
| Current                | 8.8               | 5.2         | 4.6         | 2.5         | 9.7 [7.4-12.6]             | 10.2 [7.7-13.2]  | 8.2 [5.9-11.4]   | 2.3 [1.3-4.0]    |
| Health conditions,     |                   |             |             |             |                            |                  |                  |                  |
| Heart problems         | 18.4              | 25.0        | 27.7        | 32.2        | 20.2 [17.1-23.7]           | 28.5 [24.9-32.4] | 35.1 [30.6-39.8] | 40.2 [35.8-44.9] |
| Diabetes               | 16.1              | 15.4        | 16.1        | 17.1        | 14.5 [11.8-17.6]           | 18.0 [14.9-21.5] | 19.4 [15.7-23.7] | 15.6 [12.5-19.2] |
| High Blood pressure    | 44.3              | 48.7        | 48.0        | 49.4        | 39.5 [35.6-43.5]           | 47.5 [43.4-51.6] | 49.8 [45.0-54.6] | 51.9 [47.2-56.5] |
| Stroke                 | 2.9               | 4.2         | 6.6         | 8.8         | 5.2 [3.6-7.4]              | 6.6 [4.8-9.1]    | 8.7 [6.3-11.7]   | 16.8 [13.5-20.6] |
| Arthritis              | 31.1              | 32.6        | 37.5        | 43.5        | 31.6 [27.9-35.4]           | 37.0 [33.1-41.1] | 40.6 [36.0-45.4] | 41.5 [37.0-46.2] |
| Dementia               | 0.4               | 0.4         | 0.7         | 2.0         | 0.5 [0.2-1.6]              | 1.7 [0.8-3.3]    | 2.3 [1.2-4.4]    | 4.9 [3.3-7.3]    |
| Osteoporosis           | 1.4               | 2.3         | 3.5         | 3.7         | 2.0 [1.2-3.5]              | 5.7 [4.0-8.1]    | 3.6 [2.1-5.9]    | 3.5 [2.1-5.7]    |
| Chronic lung disease   | 7.5               | 7.8         | 7.9         | 8.3         | 7.4 [5.4-10.0]             | 10.2 [7.9-13.1]  | 11.6 [8.8-15.2]  | 8.1 [5.9-10.9]   |
| <i>Unweighted N</i>    | 784               | 696         | 542         | 603         | 659                        | 624              | 458              | 503              |

ELSA=The English Longitudinal Study of Ageing, a national probability sample of non-institutionalised older people. Wave 8 (2016-2017) was used for this analysis. For variable definitions, see Supplemental Table S1 and for ELSA data management, see Stata do-file "Data\_management\_wave8\_Dec2019.do". Data were weighted to correct for non-response in the ELSA cohort study



**Supplemental Table S5.** Area deprivation and ethnicity based on each general practice.

| General practice | Eligible individuals | %Response rate | Practice IMD 2015 decile (1 More deprived to 10 Least deprived) | Estimated proportion of non-white ethnic groups in practice population |        |        |
|------------------|----------------------|----------------|-----------------------------------------------------------------|------------------------------------------------------------------------|--------|--------|
|                  |                      |                |                                                                 | %Mixed                                                                 | %Asian | %Black |
| OP-01            | 390                  | 38.5%          | -                                                               | -                                                                      | -      | -      |
| OP-02            | 381                  | 54.3%          | 10                                                              | 2.3                                                                    | 5.8    | 1.8    |
| OP-03            | 400                  | 38.5%          | 4                                                               | 4.4                                                                    | 12.8   | 4.1    |
| OP-04            | 381                  | 49.1%          | 10                                                              | 2.1                                                                    | 5.0    | 1.7    |
| OP-05            | 349                  | 54.7%          | 10                                                              | 3.4                                                                    | 9.1    | 1.8    |
| OP-06            | 396                  | 58.1%          | 10                                                              | 1.7                                                                    | 2.1    | 1.3    |
| OP-07            | 371                  | 59.8%          | 10                                                              | 1.4                                                                    | 3.6    | 0.0    |
| OP-08            | 361                  | 23.0%          | 1                                                               | 6.9                                                                    | 36.8   | 21.3   |
| OP-09            | 385                  | 48.1%          | 5                                                               | 4.6                                                                    | 15.7   | 4.0    |
| OP-10            | 378                  | 54.8%          | 10                                                              | 1.1                                                                    | 1.1    | 0.0    |
| OP-11            | 342                  | 44.7%          | 6                                                               | 4.3                                                                    | 12.7   | 6.8    |
| OP-12            | 295                  | 32.5%          | 2                                                               | 4.7                                                                    | 6.1    | 5.0    |
| OP-13            | 158                  | 5.1%           | 1                                                               | 3.9                                                                    | 62.0   | 19.1   |
| OP-14            | 391                  | 42.7%          | 6                                                               | 4.4                                                                    | 13.9   | 6.5    |
| OP-15            | 356                  | 35.7%          | 2                                                               | 2.5                                                                    | 5.9    | 2.7    |
| OP-16            | 351                  | 15.4%          | 1                                                               | 6.1                                                                    | 31.4   | 16.7   |
| OP-17            | 370                  | 54.3%          | 7                                                               | 2.2                                                                    | 5.3    | 2.0    |
| OP-18            | 376                  | 57.2%          | 10                                                              | 1.4                                                                    | 3.7    | 0.0    |
| OP-19            | 359                  | 34.5%          | 5                                                               | 4.4                                                                    | 10.9   | 6.3    |
| OP-20            | 245                  | 22.9%          | 6                                                               | 2.2                                                                    | 7.4    | 3.4    |
| OP-21            | 386                  | 37.3%          | 3                                                               | 0.0                                                                    | 1.1    | 0.0    |
| OP-22            | 394                  | 18.0%          | 1                                                               | 1.5                                                                    | 2.5    | 1.7    |
| OP-23/36*        | 350/366              | 47.4%/53.0%    | 8                                                               | 2.0                                                                    | 3.2    | 0.0    |
| OP-24            | 377                  | 46.7%          | 7                                                               | 0.0                                                                    | 1.2    | 0.0    |
| OP-25            | 345                  | 31.9%          | 3                                                               | 3.9                                                                    | 15.2   | 4.4    |
| OP-26            | 353                  | 54.4%          | 8                                                               | 0.0                                                                    | 0.0    | 0.0    |
| OP-27            | 363                  | 44.6%          | -                                                               | -                                                                      | -      | -      |
| OP-28            | 382                  | 50.5%          | 10                                                              | 0.0                                                                    | 1.2    | 0.0    |
| OP-29            | 396                  | 55.4%          | 9                                                               | 1.0                                                                    | 1.8    | 0.0    |
| OP-30            | 389                  | 5.7%           | -                                                               | -                                                                      | -      | -      |
| OP-31            | 342                  | 65.8%          | 8                                                               | 0.0                                                                    | 1.1    | 0.0    |
| OP-32            | 359                  | 53.5%          | 9                                                               | 0.0                                                                    | 0.0    | 0.0    |
| OP-33            | 351                  | 22.5%          | 4                                                               | 7.2                                                                    | 26.9   | 33.8   |
| OP-34            | 360                  | 46.4%          | 8                                                               | 1.4                                                                    | 2.8    | 0.0    |
| OP-35            | 301                  | 28.2%          | 3                                                               | 7.2                                                                    | 29.6   | 28.2   |

IMD=Index of Multiple deprivation. 8 general practices had a response rate below (red) and 13 above (green) to the expected rate (<30% and >50%, respectively). Information found on the following government website: <https://fingertips.phe.org.uk/profile/general-practice>. \*Two different random samples of individuals were selected from the same general practice.

# BMJ Open

## Cohort profile: Oxford Pain, Activity and Lifestyle (OPAL) study, a prospective cohort study of older adults in England

|                                 |                                                                                                                                                                                                                                                                                                                                                                                                                                                                                                                                                                                                                                                                                                                                                                                                                                                                                                                                                                                                                                                                                                                                                                                                                                                                                                                                                                    |
|---------------------------------|--------------------------------------------------------------------------------------------------------------------------------------------------------------------------------------------------------------------------------------------------------------------------------------------------------------------------------------------------------------------------------------------------------------------------------------------------------------------------------------------------------------------------------------------------------------------------------------------------------------------------------------------------------------------------------------------------------------------------------------------------------------------------------------------------------------------------------------------------------------------------------------------------------------------------------------------------------------------------------------------------------------------------------------------------------------------------------------------------------------------------------------------------------------------------------------------------------------------------------------------------------------------------------------------------------------------------------------------------------------------|
| Journal:                        | <i>BMJ Open</i>                                                                                                                                                                                                                                                                                                                                                                                                                                                                                                                                                                                                                                                                                                                                                                                                                                                                                                                                                                                                                                                                                                                                                                                                                                                                                                                                                    |
| Manuscript ID                   | bmjopen-2020-037516.R1                                                                                                                                                                                                                                                                                                                                                                                                                                                                                                                                                                                                                                                                                                                                                                                                                                                                                                                                                                                                                                                                                                                                                                                                                                                                                                                                             |
| Article Type:                   | Cohort profile                                                                                                                                                                                                                                                                                                                                                                                                                                                                                                                                                                                                                                                                                                                                                                                                                                                                                                                                                                                                                                                                                                                                                                                                                                                                                                                                                     |
| Date Submitted by the Author:   | 25-Jun-2020                                                                                                                                                                                                                                                                                                                                                                                                                                                                                                                                                                                                                                                                                                                                                                                                                                                                                                                                                                                                                                                                                                                                                                                                                                                                                                                                                        |
| Complete List of Authors:       | <p>Sanchez Santos, Maria ; University of Oxford, Centre for Rehabilitation Research in Oxford, Nuffield Department of Orthopaedics, Rheumatology and Musculoskeletal Sciences</p> <p>Williamson, Esther; University of Oxford, Centre for Rehabilitation Research in Oxford, Nuffield Department of Orthopaedics, Rheumatology and Musculoskeletal Sciences</p> <p>Bruce, Julie; University of Warwick, Warwick Clinical Trials Unit</p> <p>Ward, Lesley; University of Oxford, Centre for Rehabilitation Research in Oxford, Nuffield Department of Rheumatology, Orthopaedics and Musculoskeletal Sciences; Northumbria University, Department of Sport, Exercise &amp; Rehabilitation</p> <p>Mallen, Christian; Keele University, Arthritis Research UK Primary Care Centre</p> <p>Garrett, Angela; University of Oxford, Centre for Rehabilitation Research in Oxford, Nuffield Department of Orthopaedics Rheumatology and Musculoskeletal Sciences</p> <p>Morris , Alana ; University of Oxford, Centre for Rehabilitation Research in Oxford, Nuffield Department of Orthopaedics Rheumatology and Musculoskeletal Sciences</p> <p>Lamb, Sarah; University of Exeter, College of Medicine and Health; University of Oxford, Centre for Rehabilitation Research in Oxford, Nuffield Department of Orthopaedics Rheumatology and Musculoskeletal Sciences</p> |
| <b>Primary Subject Heading</b>: | Epidemiology                                                                                                                                                                                                                                                                                                                                                                                                                                                                                                                                                                                                                                                                                                                                                                                                                                                                                                                                                                                                                                                                                                                                                                                                                                                                                                                                                       |
| Secondary Subject Heading:      | Geriatric medicine                                                                                                                                                                                                                                                                                                                                                                                                                                                                                                                                                                                                                                                                                                                                                                                                                                                                                                                                                                                                                                                                                                                                                                                                                                                                                                                                                 |
| Keywords:                       | EPIDEMIOLOGY, GERIATRIC MEDICINE, Musculoskeletal disorders < ORTHOPAEDIC & TRAUMA SURGERY, PRIMARY CARE                                                                                                                                                                                                                                                                                                                                                                                                                                                                                                                                                                                                                                                                                                                                                                                                                                                                                                                                                                                                                                                                                                                                                                                                                                                           |
|                                 |                                                                                                                                                                                                                                                                                                                                                                                                                                                                                                                                                                                                                                                                                                                                                                                                                                                                                                                                                                                                                                                                                                                                                                                                                                                                                                                                                                    |

SCHOLARONE™  
Manuscripts



I, the Submitting Author has the right to grant and does grant on behalf of all authors of the Work (as defined in the below author licence), an exclusive licence and/or a non-exclusive licence for contributions from authors who are: i) UK Crown employees; ii) where BMJ has agreed a CC-BY licence shall apply, and/or iii) in accordance with the terms applicable for US Federal Government officers or employees acting as part of their official duties; on a worldwide, perpetual, irrevocable, royalty-free basis to BMJ Publishing Group Ltd ("BMJ") its licensees and where the relevant Journal is co-owned by BMJ to the co-owners of the Journal, to publish the Work in this journal and any other BMJ products and to exploit all rights, as set out in our [licence](#).

The Submitting Author accepts and understands that any supply made under these terms is made by BMJ to the Submitting Author unless you are acting as an employee on behalf of your employer or a postgraduate student of an affiliated institution which is paying any applicable article publishing charge ("APC") for Open Access articles. Where the Submitting Author wishes to make the Work available on an Open Access basis (and intends to pay the relevant APC), the terms of reuse of such Open Access shall be governed by a Creative Commons licence – details of these licences and which [Creative Commons](#) licence will apply to this Work are set out in our licence referred to above.

Other than as permitted in any relevant BMJ Author's Self Archiving Policies, I confirm this Work has not been accepted for publication elsewhere, is not being considered for publication elsewhere and does not duplicate material already published. I confirm all authors consent to publication of this Work and authorise the granting of this licence.

1  
2  
3 1 **Cohort profile: Oxford Pain, Activity and Lifestyle (OPAL) study, a**  
4  
5  
6 2 **prospective cohort study of older adults in England**  
7  
8

9 3  
10  
11 4 Maria T Sanchez-Santos<sup>1</sup>, Esther Williamson<sup>1</sup>, Julie Bruce<sup>2</sup>, Lesley Ward<sup>1,3</sup>, Christian D. Mallen<sup>4</sup>,  
12  
13 5 Angela Garrett<sup>1</sup>, Alana Morris<sup>1</sup>, Sarah E Lamb<sup>1,5</sup> on behalf of the OPAL study team  
14  
15  
16 6

17  
18 7 **Authors' affiliations:**  
19

20  
21 8 <sup>1</sup>Centre for Rehabilitation Research, Nuffield Department of Rheumatology, Orthopaedics and  
22  
23 9 Musculoskeletal Sciences, University of Oxford, Oxford, United Kingdom (UK)  
24

25  
26 10 <sup>2</sup>Warwick Clinical Trials Unit, Division of Health Sciences, University of Warwick, Coventry, UK  
27

28 11 <sup>3</sup>Department of Sport, Exercise & Rehabilitation, Northumbria University, Newcastle-upon-Tyne  
29

30 12 <sup>4</sup>School of Primary, Community and Social Care, Keele University, Staffordshire  
31  
32

33 13 <sup>5</sup>College of Medicine and Health, University of Exeter, UK  
34  
35  
36 14

37  
38 15  
39 16 **Corresponding Author:** Sarah E Lamb  
40

41 17 Email: [S.E.Lamb@exeter.ac.uk](mailto:S.E.Lamb@exeter.ac.uk)  
42

43  
44 18 Tel: +44(0)1392 722 370  
45

46 19 Heavitree Road, Exeter, Devon, EX1 2LU  
47  
48  
49 20

50  
51 21 **Words:** Abstract: 283 ; Main text: 4,836; **Tables:** 3; **Figures:** 2  
52

53 22 **Supplementary files:** 2; **References:** 68  
54  
55  
56 23  
57  
58  
59  
60

## 24 **Abstract**

25 **PURPOSE:** The 'Oxford Pain, Activity and Lifestyle' (OPAL) cohort is a longitudinal, prospective cohort  
26 study of adults, aged 65 years and older, living in the community which is investigating the  
27 determinants of health in later life. Our focus was on musculoskeletal pain and mobility, but the  
28 cohort is designed with flexibility to include new elements over time. This paper describes the study  
29 design, data collection, and baseline characteristics of participants. We also compared the OPAL  
30 baseline characteristics with nationally representative data sources.

31 **PARTICIPANTS:** We randomly selected eligible participants from two stratified age bands (65-74 and  
32 75 and over years). In total, 5,409 individuals (42.1% of eligible participants) from 35 general practices  
33 in England agreed to participate between 2016 and 2018. The majority of participants (n=5,367) also  
34 consented for research team to access their UK NHS Digital and primary health care records.

35 **FINDINGS TO DATE:** Mean participant age was 74.9 years (range 65-100); 51.5% (n=2,784/5,409)  
36 were women. 94.9% of participants were white, and 28.8% lived alone. Over 83.0% reported pain in  
37 at least one body area in the previous six weeks. Pain was more prevalent in women (86.0%). One  
38 third of participants reported having one or more falls in the last year. Most participants were  
39 confident in their ability to walk outside. Characteristics of OPAL cohort participants were broadly  
40 similar to the general population of the same age.

41 **FUTURE PLANS:** Postal follow-up of the cohort is being undertaken at annual intervals, with data  
42 collection ongoing. Linkage to NHS hospital admission data is planned. This English prospective  
43 cohort offers a large and rich resource for research on the longitudinal associations between  
44 demographic, clinical, and social factors and health trajectories and outcomes in community-dwelling  
45 older people.

## 46 **Strengths and limitations of this study**

- 47 • OPAL is a new, high quality cohort of older community-dwelling people aiming to explore  
48 causes and consequences of pain, frailty, mobility decline, disability and poor health-related  
49 quality of life.
- 50 • A total of 5,409 older adults from 35 general practices in nine distinct areas in England  
51 participated at baseline, 2016-2018.
- 52 • OPAL participants are similar to those in general population of the same age
- 53 • The cohort study relies on self-reported and routine NHS data, there is not face to face data  
54 collection.
- 55 • Our findings may under represent older people living in the community with severe cognitive  
56 impairment.

## 58 Introduction

59 The population of the United Kingdom (UK) is undergoing a fundamental change in its age structure,  
60 due to lower birth rates and extended life expectancy. One in four people in the UK are projected to  
61 be aged 65 or over by 2050, with 15% aged over 75 years and 5% aged 85 years or older<sup>1</sup>. This change  
62 reflects gains in health and social development, and it is important that as many years of life are  
63 spent in good health as possible.

64 Active independence is one of the key concerns of older people, and mobility is critically important  
65 for independence<sup>2 3</sup>. Older people value their mobility highly and consider mobility loss as a key  
66 disadvantage of aging<sup>4</sup>. Poor or limited mobility is linked to functional decline, mortality, and  
67 increased health care utilization<sup>5</sup>. Conceptually, factors associated with mobility decline precede  
68 disability within models of disablement. Therefore, identification of factors associated with mobility  
69 decline are important for prevention of, and rehabilitation from, mobility decline<sup>6</sup>.

70 Musculoskeletal pain is one of the leading causes of disability and disease burden worldwide among  
71 community-dwelling older adults<sup>7 8</sup>. A recent review estimated that the prevalence of chronic pain  
72 among older adults in the UK ranged from 42% in 65-74 years old to 62% in the over 75 age group<sup>9</sup>.  
73 These prevalence estimates are similar to other developed countries<sup>10</sup>.

74 Musculoskeletal pain has a large impact on many other aspects of older people's health such as loss  
75 of mobility, frailty, cognitive impairment, falls, and poor sleep quality<sup>11-15</sup>. However, the role of  
76 musculoskeletal pain on adverse health outcomes in older adults is poorly understood. The majority  
77 of studies are cross-sectional in design, thus are limited; and only few longitudinal studies have  
78 examined potential mediators between pain and disability<sup>16</sup>. A better understanding of the causal  
79 path between musculoskeletal pain and disability in representative community-based older adults is  
80 needed to inform decisions about treatment and rehabilitation.

1  
2  
3 81 There are a number of high quality cohort studies examining age-related health conditions among  
4  
5  
6 82 community dwelling older adults. These include the English Longitudinal Study of Ageing, the  
7  
8 83 MOBILIZE Boston Study, the Longitudinal Study of Ageing, the Baltimore Longitudinal Study of Aging  
9  
10  
11 84 and the Italian Invecchiare aging in Chianti study (InChianti), amongst many others. However, to our  
12  
13 85 knowledge, only one cohort focuses on the impact and contribution of musculoskeletal pain on  
14  
15  
16 86 disability in older people, the ongoing MOBILIZE Boston Study<sup>17</sup>. This American cohort is limited by a  
17  
18 87 relatively small sample size (765 participants at inception).

19  
20 88 In order to address these knowledge gaps, we assembled the Oxford Pain, Activity and Lifestyle  
21  
22  
23 89 (OPAL) cohort, a prospective study of community dwelling older adults from across England. The  
24  
25 90 immediate objectives were:

- 26  
27  
28 91 • To investigate the causes and consequences of mobility decline and disability in later life, and  
29  
30 92 the role and contribution of musculoskeletal pain and other factors;
- 31  
32  
33 93 • To develop a prognostic tool to assess mobility decline in a population-based cohort of older  
34  
35 94 adults in UK;
- 36  
37  
38 95 • To investigate factors that moderate or mediate the effects of musculoskeletal pain on health  
39  
40 96 outcomes. For example, we will investigate whether specific social, physical and psychological  
41  
42 97 factors play an intermediate role between low back pain and mobility decline.

43  
44  
45 98  
46  
47 99 In addition, we intend to use the OPAL cohort to identify potential participants for future clinical trials  
48  
49  
50 100 of disability prevention in later life and to study disablement and multi-morbidity more broadly. The  
51  
52 101 'cohort multiple randomised controlled trials' study design is becoming increasingly common<sup>18 19</sup>.  
53  
54  
55 102 The concept is to use data collected from an established cohort to identify people with specific health  
56  
57 103 conditions and then, as and when the opportunity arises, invite them to participate in a clinical trial  
58  
59  
60 104 relevant to their condition.



1  
2  
3  
4  
5  
6  
7  
8  
9  
10  
11  
12  
13  
14  
15  
16  
17  
18  
19  
20  
21  
22  
23  
24  
25  
26  
27  
28  
29  
30  
31  
32  
33  
34  
35  
36  
37  
38  
39  
40  
41  
42  
43  
44  
45  
46  
47  
48  
49  
50  
51  
52  
53  
54  
55  
56  
57  
58  
59  
60

105

106

In this paper, we describe the OPAL cohort, design, data collection, and the profile of study participants at baseline and their overall representativeness of the English general population.

108

## **Cohort description**

### **Study design**

A population-based, longitudinal, prospective cohort study in England, using a combination of annually administered, self-reported questionnaires and routinely collected health data.

### **Practice and participant identification**

#### *General practice identification*

General practices who were working with the NIHR Clinical Research Network (CRN), which have been shown to be generalisable to wider primary care community<sup>20</sup>, were approached to take part in the study. In terms of geographical spread, we included a range of rural and urban areas across England, to capture diversity in both socioeconomic and ethnic profiles.

#### *Participant identification*

Eligible participants were identified from electronic record searches of general practice lists. A random sample of approximately 400 individuals (median: 365; range 158-400) per practice was selected (Figure 1). To ensure an equal representation in two age bands: 65-74 years and 75 years and over, around 200 individuals per practice within each age group were randomly selected.

#### *Inclusion criteria*

People registered with a general practice, aged 65 years and older, and living in the community, including sheltered or supported housing, were eligible for invitation.

### 128 *Exclusion criteria*

129 Individuals were excluded if they lived in a residential care or nursing home. Following the generation  
130 of the random sample, a designated General Practitioner (GP) or research nurse from each practice  
131 screened the list to exclude those with known terminal illness with a life expectancy of less than six  
132 months, those who presented with severe health or social concerns sufficient to preclude approach,  
133 or those considered unable to provide informed consent.

### 135 **Sample size**

136 The sample size was determined by the prevalence of lower back pain and musculoskeletal problems  
137 in older people and driven by the sample size requirement for the prognostic tool to assess mobility  
138 decline. We pre-specified a minimum of 1,000 participants of the sample should have lower back  
139 pain as this would be sufficient for a range of epidemiological analyses, including predictive  
140 modelling, within sub-sample of people with lower back pain<sup>21 22</sup>. The Cambridge Cohort Study of  
141 Ageing<sup>23</sup> provided the most recent estimates of disabling low back pain in the population aged 70 to  
142 90 years, with prevalence of 25% to 30% for these age groups respectively. If we assume that 25% of  
143 people aged over 65 years have low back pain, then we required a minimum of 4,000 people to yield  
144 1,000 with low back pain and 3,000 people without low back pain. We estimated that between 30-  
145 40% of participants would agree to participate based on uptake to the Prevention of Falls Injury Trial  
146 (PreFIT)<sup>24</sup> which recruited an older population into an English falls prevention study and anticipated  
147 that there would be attrition from the sample over time. Therefore, we had to approach a minimum  
148 of 11,000 people, or approximately 350 people from each of 32 practices across our regions to  
149 achieve our recruitment target.

1  
2  
3  
4  
5  
6  
7  
8  
9  
10  
11  
12  
13  
14  
15  
16  
17  
18  
19  
20  
21  
22  
23  
24  
25  
26  
27  
28  
29  
30  
31  
32  
33  
34  
35  
36  
37  
38  
39  
40  
41  
42  
43  
44  
45  
46  
47  
48  
49  
50  
51  
52  
53  
54  
55  
56  
57  
58  
59  
60

## 151 **Recruitment and enrolment**

152 Recruitment and enrolment to OPAL commenced in October 2016 and completed in September  
153 2018. A total of 12,839 individuals from thirty-five general practices in nine different areas of England  
154 were invited to take part (Figure 1). A pack including an invitation letter, participant information  
155 leaflet, consent form, baseline questionnaire, and a postage paid return envelope was sent by the  
156 general practice. Five thousand four hundred and nine (42.1% of those eligible; range 5.1%-65.8%  
157 across practices) individuals who returned the baseline questionnaire and a signed consent form to  
158 the University of Oxford study office were enrolled in the study (Figure 1). One-fifth (21.3% of those  
159 eligible; n=2,736/12,839) declined participation and 4,694 (36.6%; n=4,694/12,839) did not respond.  
160 Non-responders were sent one postal reminder, four weeks after the original invitation. If no  
161 response was received, no further contact was made. The flow chart of the sample is illustrated in  
162 Figure S1 supplementary information.

## 163 **How often are participants followed up?**

164 Study participants are followed up by postal questionnaire at annual intervals for five years. First year  
165 follow up is completed, second and third year follow-up will complete in September 2020 and 2021,  
166 respectively. Future follow-up questionnaires will be sent at four and five years from the date of the  
167 original invitation.

## 169 **What is being measured?**

### 170 *Postal self-completed questionnaire*

171 The OPAL cohort study includes information on a range of domains including demographic,  
172 socioeconomic, lifestyle variables, social participation, attitudes to ageing, musculoskeletal pain,  
173 health-related factors, comorbidity, mobility, disability, frailty, cognitive function, health-related  
174 quality of life, and medications (see Table 1).

1  
2  
3 175 *Musculoskeletal symptoms* is assessed by asking the participant if they have experienced any trouble  
4  
5  
6 176 (ache, pain or discomfort) in nine different body sites (knees, hands/wrists, neck, shoulders, hips,  
7  
8 177 feet/ankles, elbows, lower and upper back) during the last six weeks<sup>25 26</sup>. Information on presence,  
9  
10  
11 178 frequency, troublesomeness, onset, and description of back pain in the last six weeks was collected  
12  
13 179 using recognised methods<sup>26-28</sup>. Information about the spread of back related symptoms was also  
14  
15 180 included. To identify individuals with possible spinal stenosis we asked participants their pain  
16  
17  
18 181 travelled into their buttocks/legs, whether it was exacerbated while standing up or walking and  
19  
20 182 whether the symptoms improved when sitting down or bending forward<sup>29 30</sup>. *Mobility* was assessed  
21  
22  
23 183 using different measures. Confidence to walk a half a mile was assessed using a single item from the  
24  
25 184 Modified Gait Self-efficacy scale which is rated on a 1 'not confident at all' to 10 "totally confident"  
26  
27  
28 185 scale<sup>31</sup>. Participants also reported their perceived usual walking pace outdoors with six possible  
29  
30 186 responses: "Unable to walk", "very slow", "stroll at an easy pace", "normal", "fairly brisk" and "fast".  
31  
32  
33 187 Change in mobility in the last year was measured with the question "Compared with 1 year ago, how  
34  
35 188 would you rate your walking in general?" (Response options: much better, somewhat better, about  
36  
37 189 the same, somewhat worse or much worse than a year ago). Participant, family, friends or doctor's  
38  
39  
40 190 concerns about participant ability to walk and move around was measured using two questions.  
41  
42 191 Potential responses were "Extremely", "A little concerned" or "Not concerned at all". Life-space  
43  
44  
45 192 mobility was measured using five questions from the life-space assessment (LSA) questionnaire <sup>32</sup>:  
46  
47 193 "During the past 4 weeks have you gone to: (1) other rooms in your home besides the room where  
48  
49  
50 194 you sleep? (2) An area outside of your home as your porch, deck or patio, hallway or garage? (3)  
51  
52 195 Different places in your neighbourhood? (4) Locations outside of your neighbourhood, but within  
53  
54  
55 196 your city? and (5) places outside your town?". *Falls* data were collected as recommended by the  
56  
57 197 Prevention of Falls Network Europe, using a single question , "In the last 12 months, have you had  
58  
59 198 any fall including a slip or trip following which you have come to rest on the ground, floor or lower  
60

1  
2  
3 199 level?"<sup>33</sup>. Three possible responses were available: not fallen, fallen once or more than once in the  
4  
5  
6 200 last year. *Frailty* was measured by The Tilburg Frailty Indicator (TFI)<sup>34 35</sup>, which is composed of two  
7  
8 201 parts. The first part describes different determinants of frailty based on sociodemographic data and  
9  
10  
11 202 health-related questions. The second part contains 15 items which measure three frailty domains:  
12  
13 203 physical (8 items), psychological (4 items) and social (3 items). Frailty total scale and individual  
14  
15  
16 204 domain scores are derived from the second part. All items are rated as a binary response of either 0  
17  
18 205 or 1. Scores are the sum of the respective item points with a total score ranged from 0 to 15, with  
19  
20 206 higher scores representing more frailty. A total score  $\geq 5$  points indicates that the individual is frail<sup>34</sup>.  
21  
22  
23 207 *Cognitive function* was measured with a clock-drawing test<sup>36</sup>. Participants were asked to draw the  
24  
25 208 entire face of a clock depicting the time "10 minutes after 11" following the instructions given in the  
26  
27  
28 209 questionnaire. Scoring was a six-point system according to visual-spatial aspects and the correct  
29  
30 210 denotation of time: normal cognition (score 6); minor visuospatial errors (score 5); mild (score 4),  
31  
32  
33 211 moderate (score 3) or severe (score 2) visuospatial disorganisation of time, or no reasonable  
34  
35 212 representation of a clock (score 1).  
36  
37  
38 213 *Health-Related Quality of life (HRQoL)* was measured by the EuroQol-5D-5L (EQ-5D-5L) questionnaire,  
39  
40 214 a generic measure of HRQoL that includes five levels of functioning from level 1 (no problems) to  
41  
42 215 level 5 (severe or extreme problems)<sup>37 38</sup>. Additionally, respondents rated their current health status  
43  
44  
45 216 according to the EuroQol-Visual Analog Scale (EQ-VAS), from 0 (worst imaginable health) to 100 (best  
46  
47 217 imaginable health). The responses from the five domains were converted into a single EQ-5D index  
48  
49  
50 218 value using the EQ-5D-5L Crosswalk Index Value Calculator to produce a final QoL value<sup>39 40</sup>. The index  
51  
52 219 values ranged between -0.594 (a state worse than death) to 1 (best possible health state).  
53  
54  
55 220  
56  
57 221 New variables have been added to follow up questionnaires (Table 1), allowing the cohort to be used  
58  
59 222 for a wider range of analytical approaches and purposes, and to dovetail to recruitment of new  
60

1  
2  
3 223 clinical trials. The first follow up (Year 1) repeated baseline variables (Table 1) with the exception of  
4  
5  
6 224 ethnicity, number of children, height, education, lifetime physical activity, main occupation during  
7  
8 225 lifetime, self-rating of strenuousness of occupation, and use of smart-phone or computer to access  
9  
10  
11 226 the internet. Added variables included presence, frequency, troublesome, location and description  
12  
13 227 of knee pain. The second wave of follow-up of data collection is collecting variables included in  
14  
15  
16 228 previous wave (Year 1) in addition to difficulty balancing whilst walking and any difficulty in the  
17  
18 229 following basic activities of daily living (ADL); bathing, transfers, toilet use, dressing and eating. Each  
19  
20 230 activity will be rated from 'no difficulty' to 'Unable to perform'.  
21  
22

### 23 231 24 25 26 232 *Characteristics of participating general practices*

27  
28 233 General practice deprivation and estimated proportion of non-white ethnic groups in the practice  
29  
30 234 population were obtained from Public Health England (PHE)<sup>41</sup>. Deprivation was measured by the  
31  
32  
33 235 Index of Multiple Deprivation 2015 (IMD2015)<sup>42</sup>. Practice IMD scores are practice population  
34  
35 236 weighted based on the Lower Layer Super Output Areas (LSOAs) where the practice population  
36  
37  
38 237 resides. LSOA is a low-level geography designed to contain 1,500 inhabitants on average. Following  
39  
40 238 the 2011 census, there were 32,844 English LSOAs.  
41

42 239 General practice urbanity was defined using the 2011 urban-rural classification<sup>43</sup>. Within this  
43  
44  
45 240 classification, any settlement with a population of 10,000 people or more is defined as urban, with  
46  
47 241 all others are classified as rural. It was determined at the LSOA level. Each general practice postcode  
48  
49  
50 242 was linked to its LSOA and it was then matched to urbanity<sup>44</sup>.  
51

### 52 243 **Data management and quality control**

53  
54 244 All data are being processed and stored according to the Data Protection Act 2018. As the OPAL study  
55  
56  
57 245 pre-dated General Data Protection Regulation (GDPR) 2018, all participants were sent an updated  
58  
59 246 GDPR statement along with their next annual questionnaire.  
60

1  
2  
3 247  
4  
5  
6 248 A software application was developed to support the filtering and random sampling of individuals  
7  
8 249 from the practice lists. Identifiable data were removed by the application. When eligible participants  
9  
10  
11 250 were selected, a unique screening number was allocated to each participant and given to the  
12  
13 251 practice. Each general practice put invitation letters into the corresponding pre-numbered  
14  
15  
16 252 participant pack and completed the mail out.

17  
18 253  
19  
20 254 The study office in Oxford receives returned questionnaires and the coordinating team undertake  
21  
22  
23 255 data quality checks. Returned questionnaires are processed using the electronic data capture  
24  
25 256 software TeleForm Workgroup (Serial Number: 247885; Company name: ePartner Consulting Ltd),  
26  
27  
28 257 which includes internal system validation checks. Once questionnaires are scanned, additional  
29  
30 258 validation is manually completed by a member of the OPAL study team. For example, if a  
31  
32  
33 259 questionnaire is returned with a double-page spread missing, the participant is contacted by  
34  
35 260 telephone with a maximum of two attempts (on two separate days) to complete missing sections.  
36

37 261  
38

### 39 40 262 **Access to electronic linkage**

41  
42 263 The majority of OPAL participants (99.2% of those who agreed to participate; n=5,367/5,409)  
43  
44  
45 264 consented for the research team access their UK NHS Digital and primary health care records, and to  
46  
47 265 be approached for future interventional and observational studies (Up to date, data linkage are not  
48  
49  
50 266 completed). NHS Digital is a national provider of information, data and information technology  
51  
52 267 systems for commissioners, analysts and clinicians in health and social care. The database holds  
53  
54 268 information on hospital admissions, outpatient and accident and emergency department visits for  
55  
56  
57 269 individuals receiving NHS hospital treatment in England<sup>45</sup>. Diagnoses are coded using the World  
58  
59  
60

1  
2  
3 270 Organisation's (WHO) International Classification of Disease version 10 (ICD-10). In addition, date and  
4  
5  
6 271 cause of death of death will be purchased/linked to NHS Digital.  
7

## 8 272 9 10 11 273 **Patient and public involvement statement** 12

13  
14 274 Patients and the public were involved in the development of the research question, the design of the  
15  
16  
17 275 study, and the conduct of the research. We piloted and refined the OPAL cohort study questionnaires  
18  
19 276 with our Patient and Public Involvement (PPI) representatives. Our PPI group included older adults  
20  
21  
22 277 for whom English was a second language in order to ensure acceptability of wording of materials and  
23  
24 278 to assist with uptake of the study by ethnic minority groups. We will continue to collaborate with our  
25  
26 279 PPI representatives when drafting publications and with dissemination of findings to patients and the  
27  
28  
29 280 public.  
30

## 31 281 32 33 34 282 **Ethics** 35

36 283 Ethical approval for the study was provided by the London - Brent Research Ethics Committee  
37  
38 284 (16/LO/0348) on 10th March 2016. All participants provided written informed consent, returned with  
39  
40  
41 285 the baseline questionnaire before being enrolled in the cohort study.  
42

## 43 286 44 45 46 287 **Statistical analysis** 47

48  
49 288 Descriptive statistics were used to summarize demographic and health-related measures of the OPAL  
50  
51  
52 289 participants at baseline. Selected key demographic and health-related variables are reported in this  
53  
54 290 manuscript.  
55

56 291 To assess whether our cohort is representative of the population of England, we compared a range  
57  
58  
59 292 of demographic and health-related characteristics of the OPAL cohort study with the 2011 England  
60



1  
2  
3 293 Census<sup>46</sup> and with The English Longitudinal Study of Ageing (ELSA) cohort<sup>47</sup>. We deliberately focus on  
4  
5  
6 294 absolute differences and not on statistical significance because the large study samples may produce  
7  
8 295 low p-values even when absolute differences are small. Analyses were performed using STATA  
9  
10  
11 296 software V.15.1 (StataCorp).

12  
13  
14 297  
15  
16  
17 298 *The English Longitudinal Study of Ageing (ELSA)*

18  
19 299 The ELSA study is an ongoing prospective cohort study of a representative sample of community-  
20  
21 300 dwelling people aged 50 years or older living in England<sup>47</sup>. It started in 2002 (wave 1), with  
22  
23  
24 301 participants recruited from an annual cross-sectional survey of households who were then followed  
25  
26 302 up every two years. For this comparison, we used cross-sectional ELSA data from the core members  
27  
28 303 (n=7,223) at wave eight (May 2016-June 2017), as the time-period was comparable with the OPAL  
29  
30  
31 304 study on recruitment. ELSA participants aged <65 years (n=2,102) and institutionalized (n=56) were  
32  
33 305 excluded for the comparison. Thus, data from 5,065 ELSA participants were included.

34  
35  
36 306 We compared the following participant characteristics between ELSA and OPAL: work status (retired  
37  
38 307 vs. non-retired), current relationship status (married vs. non-married), weight, smoking status and  
39  
40  
41 308 health-related self-reported doctor-diagnosed chronic diseases (arthritis, diabetes, heart problems,  
42  
43 309 stroke, dementia, lung disease, osteoporosis and high blood pressure)<sup>48</sup>. We applied the  
44  
45 310 recommended weightings to the data to correct for non-response in ELSA cohort study<sup>49</sup>.

46  
47  
48 311 Further details of the variables used in OPAL and ELSA cohort studies are in Table S1 supplementary  
49  
50 312 information. The ELSA data management is available in a Stata do-file  
51  
52  
53 313 "Data\_management\_wave8\_Dec2019.do" in supplementary information. The measurement  
54  
55 314 protocol for the ELSA cohort study can be found at <http://www.ifs.org.uk/elsa>.

56  
57  
58  
59  
60

### 3 315 *Dealing with missing data*

5 316 Bias due to missing data (and the mechanism causing the data to be missing) will be investigated and  
7  
8 317 an appropriate analysis approach, such as multiple imputation and/or inverse-probability weighting,  
9  
10 318 to manage this problem will be used depending of the type of study being analysed. Only observed  
11  
12 319 characteristics of OPAL participants at baseline are shown in this manuscript.

## 17 321 **Findings to date**

### 20 322 **Response to invitation to participate**

22 323 Eight thousand one hundred and forty-five individuals (63.4% amongst the 12,839 eligible  
23  
24  
25 324 participants) who were sent the invitation letter responded to the invitation, 5,409 individuals (65.6%  
26  
27 325 amongst the 8,240 responders) agreed to participate in the study and 2,736 individuals declined to  
28  
29  
30 326 participated (Supplementary Figure S1).

32 327 Age and sex distribution of participants and non-participants (declined and non-responders) are  
33  
34  
35 328 shown in Supplementary Table S2, and by general practice in Supplementary Figure S2-S3. Overall,  
36  
37 329 the participation rate in the OPAL cohort study was lower in the oldest age group (participation rates  
38  
39 330 were over 40% for those aged 65-79 years and 36% for those aged 80+ years, respectively), although  
40  
41  
42 331 these were within the expected response rate. Response rate was similar between sexes  
43  
44 332 (participation rates were 44.2% and 42.8% in men and women, respectively). No differences between  
45  
46  
47 333 participants and non-participants in terms of age or sex was observed, and these results were  
48  
49 334 consistent across most practices.

51 335 Questionnaire response rate (amongst eligible individuals) by practice ranged from 5.1% to 65.8%  
52  
53  
54 336 (median: 45.6%; IQR: 32.2%-54.3%). Lower levels of response were observed in the most deprived  
55  
56 337 practices (Supplementary Table S3)

1  
2  
3 339 OPAL baseline data has a low proportion of missing values. The amount of missing data for any single  
4  
5  
6 340 variable varied from 0.2% (n=13/5,409) (for relationship status and current work status) to 5.9%  
7  
8 341 (n=321/5,409) (for Tilburg frailty score (0-15); item missing ranging from 0.4% to 1.9%).  
9

10  
11 342

### 12 13 343 **Characteristics of OPAL study participants at baseline**

14  
15 344 The demographic characteristics of participants are reported in Table 2. Half of the participants were  
16  
17  
18 345 women (51.5%; n=2,784/5,409), and the mean (SD) age was 74.9 (6.8) years, ranging from 65 to 100  
19  
20 346 years. The majority of study participants were white (94.9%; n=5,132/5,409).  
21

22  
23 347 The majority of participants were married or partnered (66.6%; n=3,602/5,409), with a higher  
24  
25 348 proportion of women living alone. Most participants were retired (84.8%; n=4,589/5,409), and had  
26  
27  
28 349 secondary school education (56.4%; n= 3,051/5,409). The median (IQR) area deprivation score of  
29  
30 350 participants was 12.5 (6.9-20.3) and it was similar between sexes. In England the median (IQR)  
31  
32  
33 351 deprivation score is 17.4 (9.7-30.1). Women were less likely to report they were current smokers or  
34  
35 352 drinking alcoholic beverages at least once every week than men. Prevalence of overweight (BMI: 25-  
36  
37 353 29.9 kg/m<sup>2</sup>) and obesity (BMI: ≥30 kg/m<sup>2</sup>) amongst the whole sample was 38.1% (n=2,061/5,409) and  
38  
39  
40 354 18.6% (n=1,005/5,409), respectively.  
41

42 355 Health-related variables of men and women are described in Table 3 and Figure 2. A high proportion  
43  
44  
45 356 of OPAL participants (84.0%; n=4,543/5,409) reported musculoskeletal symptoms in at least one  
46  
47 357 body area in the previous six weeks, with symptoms being more prevalent in women than men (Table  
48  
49  
50 358 3). Low back pain was the most frequently reported site for pain (44.4%; n=2,404/5,409).  
51

52 359 The majority of participants were mobile and were confident to walk half a mile (66.1%;  
53  
54 360 n=3,577/5,409), with a higher proportion of men being confident walkers. Over one-third (38.7%;  
55  
56  
57 361 n=2,094/5,409) of participants rated their walking speed as strolling at an easy pace or very slow,  
58  
59 362 18.5% (n=1,002/5,409) reported using a walking aid inside or outside, and 25.5% (n=1,375/5,409)  
60

1  
2  
3 363 reported that their walking speed to be slower than a year ago. Over a quarter of participants (29.0%;  
4  
5  
6 364 n=1,569/5,409) reported having fallen once or more in the 12 months prior to the baseline  
7  
8 365 questionnaire, and 27.1% (n=1,463/5,409) were classified as frail. Frailty was more prevalent in  
9  
10  
11 366 women. The majority of study participants presented high cognitive function, with 82.8%  
12  
13 367 (n=4,481/5,409) of participants having a score of 5 or 6 points in the clock-drawing test. Most of the  
14  
15 368 participants reported good health across four domains of the EQ-5D-5L questions with 88.5%  
16  
17  
18 369 (n=4,784/5,409), 69.7% (n=3,772/5,409), 66.1% (n=3,577/5,409) and 59.0% (n=3,190/5,409)  
19  
20 370 reporting no problems with self-care, anxiety/depression, usual activities and mobility, respectively,  
21  
22  
23 371 except for pain/discomfort with a percentage of participants reporting no problems of 29.5%  
24  
25 372 (n=1,594/5,409). The average HRQoL measured by EQ-5D-5L crosswalk value set and the EQ-VAS  
26  
27  
28 373 were 0.79 (SD 0.20) and 78.4 (SD 17.4), respectively. Women reported worse HRQoL (lower average  
29  
30 374 score in both scales) compared with men (Table 3). The average self-reported EQ VAS score in  
31  
32  
33 375 population norms for UK population aged 65-74 and 75 years and over<sup>50</sup> is broadly comparable to  
34  
35 376 the OPAL study (population norm vs. OPAL study: 77.3 vs. 80.5 and 73.8 vs. 75.6, respectively).  
36  
37 377  
38  
39  
40 378 The more frequently self-reported health condition was high blood pressure (45.5%; n=2,459/5,409),  
41  
42 379 followed by arthritis (44.2%; n=2,391/5,409) and angina or heart problems (20.2%; n=1,094/5,409).  
43  
44  
45 380 High blood pressure was the most prevalent condition amongst men (47.4%; n=1,244/2,625), and  
46  
47 381 arthritis the most prevalent in women (52.3%; 1,455/2,784) (Figure 2).  
48  
49  
50 382

### 51 52 383 **Representativeness of OPAL Cohort study**

53  
54 384 Demographic characteristics in OPAL cohort study were similar to the general population of the same  
55  
56  
57 385 age range in the 2011 England Census (Supplementary Table S4). There was a lower proportion of  
58  
59 386 women in the 80 and older age group in OPAL study compared to the general population.  
60

1  
2  
3 387 Supplementary Table S5 and S6 show the sex-specific distribution of health-related characteristics in  
4  
5  
6 388 OPAL and ELSA cohort studies across four age groups. Overall, health-related characteristics of the  
7  
8 389 OPAL participants were broadly comparable with those recruited to the nationally representative  
9  
10  
11 390 ELSA cohort study.

12  
13 391 . Both men and women participants in the OPAL study were less likely to smoke and had a lower  
14  
15 392 prevalence of self-reported heart problems, stroke and dementia.

17 18 393

### 19 20 394 **Characteristics of included general practices**

21  
22  
23 395 General practice area deprivation and the estimated proportion of ethnic groups registered in the  
24  
25 396 practice population are described in Supplementary Table S3. Of the 35 general practices included in  
26  
27 397 the study, 32 had data available on PHE national general practice profiles website. Nine of 32  
28  
29  
30 398 practices (28.1%) were classified among the most deprived practices (IMD deciles 1-3), 14/32 (43.8%)  
31  
32 399 in the most affluent practices (IMD deciles 8-10) and the remainder categorised as moderate (n=9/32;  
33  
34 400 28.1%; IMD deciles 4-7).

35  
36  
37 401 Over 14.3% (n=5/35) of general practices are located in rural areas, a slightly lower proportion than  
38  
39  
40 402 across rural areas in England as a whole (17.0%; n=5,598/32,844 LSOAs).

### 41 42 403 **Cohort multiple randomized controlled trial**

43  
44 404 The first registered RCT utilizing the OPAL cohort study is now being undertaken. This NIHR funded  
45  
46  
47 405 trial is testing the effectiveness of a physiotherapist delivered combined physical and psychological  
48  
49 406 intervention for older adults with neurogenic claudication compared to best practice advice  
50  
51  
52 407 (BOOST)<sup>51</sup>. The trial is registered with the International Standard Randomised Controlled Trials  
53  
54 408 database, reference number ISRCTN12698674.

55 56 409

57 409

58

59

60

## Strengths and limitations

The original target for recruitment of the OPAL cohort study was a minimum of 4,000 older adults from 32 general practices. However, uptake was better than predicted and we have recruited 5,409 older adults from 35 general practices within nine distinct areas, providing good geographical coverage within England. The wide range of self-report health measures will allow us to account for a large range of potential mediating and confounding variables.

One important limitation of the cohort is the reliance upon self-reported data. We acknowledge that performance tests may provide more reliable objective data, however, we were interested in patient reported factors and outcomes as these are feasible to capture during a patient consultation and findings may application within clinical practice. We also have obtained written informed consent to access NHS Digital and primary health care data for the majority of the participants, to allow independent verification of diagnoses related to hospital admission and attendance, and as well as important elements of health service resource use and mortality. Biological markers are not systematically collected in electronic health records and this may be a potential weaknesses. However, the OPAL cohort study was designed to elucidate the epidemiology of musculoskeletal pain and the contribution of pain on health related outcomes rather than attempt to investigate the biological underpinning of musculoskeletal pain.

Individuals living in more deprived neighbourhoods (based on practice population deprivation) and non-white ethnicity groups were less likely to participate in OPAL (Supplementary Table S3). This finding is consistent with other epidemiological studies which report that populations with a lower socioeconomic position are less likely to take part in research compared to those with higher socioeconomic position<sup>52</sup>. Nevertheless, our population is broadly representative of the English population.

1  
2  
3 433 Our findings will apply to community-dwelling older adults in England and may under represent those  
4  
5  
6 434 living in the community with severe cognitive impairment.  
7  
8 435 In terms of the representativeness of the OPAL study, demographic and health-related  
9  
10  
11 436 characteristics of OPAL participants are similar to those in the general population (2011 Census) and  
12  
13 437 ELSA study (Supplementary Table S4, S5 and S6), respectively. The selected variables for the  
14  
15  
16 438 comparison analysis had good comparability in both OPAL and ELSA studies, but there were some  
17  
18 439 differences. For example, in ELSA, weight was calculated using measured weight, whereas in OPAL  
19  
20 440 weight was self-reported. Self-reported weight tends to be underreported, particularly by women  
21  
22  
23 441 and those who are heaviest<sup>53</sup>. In addition, in ELSA, the definition of 'smoker status' and health  
24  
25 442 conditions combines information from previous waves, whereas in OPAL study, only baseline  
26  
27  
28 443 information was used. This may have led to a slight underestimation of the difference between ELSA  
29  
30 444 and OPAL in the percentage of 'ex-smoker' and individuals with the health condition.  
31  
32  
33

### 34 445 **Future work**

35  
36 446 Data collection for the Year 1 follow-up questionnaire was completed in September 2019 and Year 2  
37  
38 447 and 3 follow-up will be completed in 2020 and 2021, respectively. We plan to administer  
39  
40  
41 448 questionnaires at annual intervals, and aim to continue this for a minimum of five years.  
42

43 449 The potential of this data set has yet to be exploited and further work is in progress. We will start  
44  
45  
46 450 focusing on particular health domains (such as low back pain and mobility problems), together with  
47  
48 451 an exploration of factors underlying the variability of those health domains. For example, we will  
49  
50  
51 452 investigate whether social, physical and psychological factors mediate the effect between low back  
52  
53 453 pain and immobility. Future work will include the development of a prognostic tool to identify older  
54  
55 454 adults at risk of mobility decline to help individuals, GPs and other health professionals identify risk  
56  
57  
58 455 factors and when these should be prioritised as a treatment target. This longitudinal cohort study  
59  
60

1  
2  
3 456 will also identify health trajectories and will examine their associations with demographic, clinical,  
4  
5  
6 457 and social factors, with the aim of identifying factors that maintain good health and independence in  
7  
8 458 older people.  
9

## 10 11 12 459 **Collaboration**

13  
14 460 We welcome potential collaborations with other research groups. Interested researchers should  
15  
16 461 contact Professor Sarah (Sallie) Lamb ([S.E.Lamb@exeter.ac.uk](mailto:S.E.Lamb@exeter.ac.uk) / [sarah.lamb@ndorms.ox.ac.uk](mailto:sarah.lamb@ndorms.ox.ac.uk)) to  
17  
18  
19 462 discuss collaboration. Further information on the OPAL cohort study can be found on our website:  
20  
21 463 <https://www.ndorms.ox.ac.uk/rrio/opal>.  
22

23  
24 464  
25  
26  
27  
28  
29  
30  
31  
32  
33  
34  
35  
36  
37  
38  
39  
40  
41  
42  
43  
44  
45  
46  
47  
48  
49  
50  
51  
52  
53  
54  
55  
56  
57  
58  
59  
60



1  
2  
3  
4  
5  
6  
7  
8  
9  
10  
11  
12  
13  
14  
15  
16  
17  
18  
19  
20  
21  
22  
23  
24  
25  
26  
27  
28  
29  
30  
31  
32  
33  
34  
35  
36  
37  
38  
39  
40  
41  
42  
43  
44  
45  
46  
47  
48  
49  
50  
51  
52  
53  
54  
55  
56  
57  
58  
59  
60

## 465 **Data sharing statement**

466 Further information on the OPAL cohort study can be found on our website:

467 <https://www.ndorms.ox.ac.uk/rrio/opal>. Unpublished data will be available for data sharing.

468 Enquires can be made to Professor Sarah (Sallie) Lamb (Principal Investigator, e-mail:

469 [sarah.lamb@ndorms.ox.ac.uk](mailto:sarah.lamb@ndorms.ox.ac.uk) / [S.E.Lamb@exeter.ac.uk](mailto:S.E.Lamb@exeter.ac.uk)).

## 471 **OPAL Study Team**

472 Conway O, Darton F, Dutton S, Garrett A, Hagan D, Haywood D, Hewitt A, Lamb S, Marian I, Morris A,

473 Nevay L, Nicolson P, Sanchez-Santos MT, Bruce J, Slark M, Vadher K, Ward L, Watson M, Williamson

474 E, Arden N, Barker K, Collins G, Fairbank J, Fitch J, French D, Griffiths F, Hanson Z, Hutchinson C,

475 Mallen C, Petrou S.

## 477 **OPAL General Practice Team**

478 Grange Hill Surgery, Birmingham; Gosford Hill Medical Centre, Oxford; River Brook Medical Centre,

479 Birmingham; The Key Medical Practice, Oxford; Summertown Health Centre, Oxford; Alconbury and

480 Brampton Surgeries, Cambridgeshire; Old Exchange Surgery, Cambridgeshire; The Wand Medical

481 Centre, Birmingham; Kingsfield Medical Centre, Birmingham; Buckden and Little Paxton Surgery,

482 Cambridgeshire; Temple Cowley Medical Group, Oxford; Keynell Covert Surgery, Birmingham;

483 Burbury Medical Centre, Birmingham; Hollow Way Medical Centre, Oxford; Priory View Medical

484 Centre, Leeds; Newton Surgery, Leeds; Priory Fields Surgery, Cambridgeshire, Cromwell Place

485 Surgery, Cambridgeshire; Craven Road Medical Centre, Leeds; Queslett Medical Practice,

486 Birmingham; Hall Street Medical Centre, Saint Helens; Vauxhall Health Centre, Liverpool; Ireland

487 Wood Surgery, Leeds; Civic Medical Centre, Wirral; Brownlow Group Practice, Liverpool; Wareham

488 Surgery, Dorset; The Adam Practice, Poole; The Harvey Practice, Dorset; Three Chequers Medical

1  
2  
3 489 Practice, Salisbury; Gate Medical Centre, Birmingham; Rendcomb Surgery, Cirencester; Cotswold  
4  
5  
6 490 Medical Practice, Cheltenham; Brigstock and South Norwood Partnership, Croydon; Portland  
7  
8 491 Practice, Gloucestershire; Eversley Medical Centre, Croydon.  
9

### 10 11 492 12 13 493 **Supporting NIHR Clinical Research Networks (CRN)**

14  
15  
16 494 Thames Valley and South Midlands, Eastern; Yorkshire and the Humber, North West Coast; Wessex,  
17  
18 495 West of England; West Midlands, South London.  
19

### 20 21 496 22 23 497 **Competing interests**

24  
25 498 All authors have completed the Unified Competing Interest form at  
26  
27 [www.icmje.org/coi\\_disclosure.pdf](http://www.icmje.org/coi_disclosure.pdf). JB reports reports grant funding from NIHR, Diabetes Research  
28 499  
29  
30 500 UK and Medronic Ltd. CM reports grants from NIHR, during the conduct of the study. SL reports and  
31  
32  
33 501 declared competing interests of authors: Sarah E Lamb was on the Health Technology Assessment  
34  
35 502 (HTA) Additional Capacity Funding Board, HTA End of Life Care and Add-on Studies Board, HTA  
36  
37  
38 503 Prioritisation Group Board and the HTA Trauma Board. All other authors declare no conflicts of  
39  
40 504 interest.  
41

### 42 43 505 44 45 506 **Funding**

46  
47 507 This research is funded by the NIHR Programme Grants for Applied Research (reference: PTC-RP-PG-  
48  
49  
50 508 0213-20002). Preparatory work for the programme of research was supported by the NIHR  
51  
52 509 Collaborations for Leadership in Applied Health Research and Care (CLAHRC). Christian D. Mallen. is  
53  
54  
55 510 funded by the National Institute for Health Research (NIHR) Applied Research Collaboration (West  
56  
57 511 Midlands), the NIHR School for Primary Care Research and an NIHR Research Professorship in General  
58  
59  
60

1  
2  
3 512 Practice (NIHR-RP-2014-04-026). Julie Bruce is supported from NIHR Research Capability Funding via  
4  
5  
6 513 University Hospitals Coventry and Warwickshire.

7  
8 514

## 9 10 11 515 **Disclosure**

12  
13 516 The views expressed in this article are those of the authors and not necessarily those of the NHS, the  
14  
15  
16 517 NIHR, our funding bodies or the Department of Health and Social Care.

17  
18 518

## 19 20 21 519 **Author contributions**

22  
23 520 MTSS participated in the data preparation, analysis, and interpretation; and the development and  
24  
25  
26 521 writing of the paper. EW participated in the OPAL study design, data collection and interpretation of  
27  
28 522 the results of the paper. JB, LW and CM participated in the OPAL study design, data collection and  
29  
30  
31 523 interpretation of findings. AG and AM participated in the design of the OPAL study, data collection,  
32  
33 524 data preparation and interpretation of findings. SL conceived the study, secured funding, and  
34  
35 525 oversaw all aspects as principal investigator. SL participated in the design and execution of the OPAL  
36  
37  
38 526 study, and the development and writing of the paper. All authors contributed and approved the final  
39  
40 527 manuscript.

41  
42  
43 528

## 44 529 **Acknowledgments**

45  
46 530 The authors would like to thank the individuals who participated in The Oxford Pain, Activity and  
47  
48  
49 531 Lifestyle (OPAL) cohort study, the general practitioners and their staff for assisting with the  
50  
51 532 identification and invitation of eligible individuals and the NIHR Biomedical Research Centre, Oxford  
52  
53  
54 533 for funding this study (grant reference PTC-RP-PG-0213-20002).

55  
56 534

57  
58  
59  
60

## References

1. ONS. National population projections: 2016-based: Office for National Statistics; 2017 [Available from: <https://www.ons.gov.uk/releases/nationalpopulationprojections2016basedstatisticalbulletin> accessed 11/06/2019 2019].
2. Fried LP, Tangen CM, Walston J, et al. Frailty in older adults: evidence for a phenotype. *The journals of gerontology Series A, Biological sciences and medical sciences* 2001;56(3):M146-56. [published Online First: 2001/03/17]
3. Troutman-Jordan M, Staples J. Successful aging from the viewpoint of older adults. *Research and theory for nursing practice* 2014;28(1):87-104. [published Online First: 2014/04/30]
4. Parsons S, Gale CR, Kuh D, et al. Physical capability and the advantages and disadvantages of ageing: Perceptions of older age by men and women in two British cohorts. *Ageing and Society* 2014;34(3):452-71. doi: <https://doi.org/10.1017/S0144686X12001067>
5. Hardy SE, Kang Y, Studenski SA, et al. Ability to walk 1/4 mile predicts subsequent disability, mortality, and health care costs. *Journal of general internal medicine* 2011;26(2):130-5. doi: 10.1007/s11606-010-1543-2 [published Online First: 2010/10/26]
6. Ward RE, Beauchamp MK, Latham NK, et al. A Novel Approach to Identifying Trajectories of Mobility Change in Older Adults. *PLoS one* 2016;11(12):e0169003. doi: 10.1371/journal.pone.0169003 [published Online First: 2016/12/23]
7. Woolf AD, Pfleger B. Burden of major musculoskeletal conditions. *Bulletin of the World Health Organization* 2003;81(9):646-56. [published Online First: 2004/01/09]
8. Global, regional, and national disability-adjusted life-years (DALYs) for 359 diseases and injuries and healthy life expectancy (HALE) for 195 countries and territories, 1990-2017: a systematic analysis for the Global Burden of Disease Study 2017. *Lancet* 2018;392(10159):1859-922. doi: 10.1016/s0140-6736(18)32335-3 [published Online First: 2018/11/13]
9. Fayaz A, Croft P, Langford RM, et al. Prevalence of chronic pain in the UK: a systematic review and meta-analysis of population studies. *BMJ open* 2016;6(6):e010364. doi: 10.1136/bmjopen-2015-010364 [published Online First: 2016/06/22]
10. Andorsen OF, Ahmed LA, Emaus N, et al. High prevalence of chronic musculoskeletal complaints among women in a Norwegian general population: the Tromso study. *BMC research notes* 2014;7:506. doi: 10.1186/1756-0500-7-506 [published Online First: 2014/08/12]
11. Eggermont LH, Leveille SG, Shi L, et al. Pain characteristics associated with the onset of disability in older adults: the maintenance of balance, independent living, intellect, and zest in the Elderly Boston Study. *J Am Geriatr Soc* 2014;62(6):1007-16. doi: 10.1111/jgs.12848 [published Online First: 2014/05/16]
12. Leveille SG, Jones RN, Kiely DK, et al. Chronic musculoskeletal pain and the occurrence of falls in an older population. *JAMA* 2009;302(20):2214-21. doi: 10.1001/jama.2009.1738
13. Whitlock EL, Diaz-Ramirez LG, Glymour MM, et al. Association Between Persistent Pain and Memory Decline and Dementia in a Longitudinal Cohort of Elders. *JAMA internal medicine* 2017;177(8):1146-53. doi: 10.1001/jamainternmed.2017.1622 [published Online First: 2017/06/07]
14. Chen Q, Hayman LL, Shmerling RH, et al. Characteristics of chronic pain associated with sleep difficulty in older adults: the Maintenance of Balance, Independent Living, Intellect, and Zest in the Elderly (MOBILIZE) Boston study. *J Am Geriatr Soc* 2011;59(8):1385-92. doi: 10.1111/j.1532-5415.2011.03544.x [published Online First: 2011/08/03]
15. Saraiva MD, Suzuki GS, Lin SM, et al. Persistent pain is a risk factor for frailty: a systematic review and meta-analysis from prospective longitudinal studies. *Age and ageing* 2018;47(6):785-93. doi: 10.1093/ageing/afy104 [published Online First: 2018/07/28]
16. Lee H, Hübscher M, Moseley GL, et al. How does pain lead to disability? A systematic review and meta-analysis of mediation studies in people with back and neck pain. *Pain* 2015;156(6):988-97. doi: 10.1097/j.pain.000000000000146 [published Online First: 2015/03/12]
17. Leveille SG, Kiel DP, Jones RN, et al. The MOBILIZE Boston Study: design and methods of a prospective cohort study of novel risk factors for falls in an older population. *BMC geriatrics* 2008;8:16. doi: 10.1186/1471-2318-8-16 [published Online First: 2008/07/22]

- 1  
2  
3 586 18. Relton C, Torgerson D, O'Cathain A, et al. Rethinking pragmatic randomised controlled trials: introducing  
4 587 the "cohort multiple randomised controlled trial" design. *BMJ (Clinical research ed)* 2010;340:c1066.  
5 588 doi: 10.1136/bmj.c1066 [published Online First: 2010/03/23]  
6 589  
7 589 19. Clegg A, Relton C, Young J, et al. Improving recruitment of older people to clinical trials: use of the cohort  
8 590 multiple randomised controlled trial design. *Age and ageing* 2015;44(4):547-50. doi:  
9 591 10.1093/ageing/afv044 [published Online First: 2015/04/11]  
10592 20. McManus RJ, Ryan R, Jones M, et al. How representative of primary care are research active practices?  
11593 Cross-sectional survey. *Family practice* 2008;25(1):56-62. doi: 10.1093/fampra/cmm065 [published  
12594 Online First: 2007/12/01]  
13595 21. Harrell Jr FE. Regression modeling strategies: with applications to linear models, logistic regression and  
14596 survival analysis. New York, Springer. New York: Springer 2001.  
15597 22. Peduzzi P, Concato J, Kemper E, et al. A simulation study of the number of events per variable in logistic  
16597 regression analysis. *Journal of clinical epidemiology* 1996;49(12):1373-9. doi: 10.1016/s0895-  
17598 4356(96)00236-3 [published Online First: 1996/12/01]  
18599 23. Docking RE, Fleming J, Brayne C, et al. Epidemiology of back pain in older adults: prevalence and risk factors  
19600 for back pain onset. *Rheumatology (Oxford)* 2011;50(9):1645-53. doi: 10.1093/rheumatology/ker175  
20601 [published Online First: 2011/05/25]  
21602 24. Bruce J, Lall R, Withers EJ, et al. A cluster randomised controlled trial of advice, exercise or multifactorial  
22603 assessment to prevent falls and fractures in community-dwelling older adults: protocol for the  
23604 prevention of falls injury trial (PreFIT). *BMJ open* 2016;6(1):e009362. doi: 10.1136/bmjopen-2015-  
24605 009362 [published Online First: 2016/01/20]  
25606 25. Kuorinka I, Jonsson B, Kilbom A, et al. Standardised Nordic questionnaires for the analysis of  
26607 musculoskeletal symptoms. *Applied ergonomics* 1987;18(3):233-7. [published Online First:  
28608 1987/09/01]  
29609 26. Parsons S, Breen A, Foster NE, et al. Prevalence and comparative troublesomeness by age of  
30610 musculoskeletal pain in different body locations. *Family practice* 2007;24(4):308-16. doi:  
31611 10.1093/fampra/cmm027 [published Online First: 2007/07/03]  
32612 27. Deyo RA, Battie M, Beurskens AJ, et al. Outcome measures for low back pain research. A proposal for  
33613 standardized use. *Spine (Phila Pa 1976)* 1998;23(18):2003-13. doi: 10.1097/00007632-199809150-  
34614 00018 [published Online First: 1998/10/21]  
35615 28. Lamb SE, Lall R, Hansen Z, et al. A multicentred randomised controlled trial of a primary care-based  
3616 cognitive behavioural programme for low back pain. The Back Skills Training (BeST) trial. *Health  
37617 Technol Assess* 2010;14(41):1-253, iii-iv. doi: 10.3310/hta14410  
38617 29. de Schepper EI, Overvest GM, Suri P, et al. Diagnosis of Lumbar Spinal Stenosis: An Updated Systematic  
39618 Review of the Accuracy of Diagnostic Tests. *Spine (Phila Pa 1976)* 2013;38(8):E469-E81. doi:  
40619 10.1097/BRS.0b013e31828935ac  
41620 30. Suri P, Rainville J, Kalichman L, et al. Does this older adult with lower extremity pain have the clinical  
42621 syndrome of lumbar spinal stenosis? *JAMA* 2010;304(23):2628-36. doi: 10.1001/jama.2010.1833  
43622 31. Newell AM, VanSwearingen JM, Hile E, et al. The modified Gait Efficacy Scale: establishing the psychometric  
44623 properties in older adults. *Physical therapy* 2012;92(2):318-28. doi: 10.2522/ptj.20110053 [published  
45624 Online First: 2011/11/15]  
46624 32. Peel C, Sawyer Baker P, Roth DL, et al. Assessing mobility in older adults: the UAB Study of Aging Life-Space  
47625 Assessment. *Physical therapy* 2005;85(10):1008-119. [published Online First: 2005/09/27]  
48626 33. Lamb SE, Jørstad-Stein EC, Hauer K, et al. Development of a common outcome data set for fall injury  
49627 prevention trials: the Prevention of Falls Network Europe consensus. *J Am Geriatr Soc*  
50628 2005;53(9):1618-22. doi: 10.1111/j.1532-5415.2005.53455.x  
51629 34. Gobbens RJ, van Assen MA, Luijckx KG, et al. The Tilburg Frailty Indicator: psychometric properties. *Journal  
52630 of the American Medical Directors Association* 2010;11(5):344-55. doi: 10.1016/j.jamda.2009.11.003  
53631 35. Gobbens RJ, van Assen MA, Luijckx KG, et al. Determinants of frailty. *Journal of the American Medical  
54632 Directors Association* 2010;11(5):356-64. doi: 10.1016/j.jamda.2009.11.008 [published Online First:  
55633 2010/06/01]  
56633  
57634  
58635  
59636  
60

- 1  
2  
3 637 36. Shua-Haim J, Koppuzha G, Gross J. A simple scoring system for clock drawing in patients with Alzheimer's  
4 638 disease. *J Am Geriatr Soc* 1996;44(3):335. [published Online First: 1996/03/01]  
5 639 37. Herdman M, Gudex C, Lloyd A, et al. Development and preliminary testing of the new five-level version of  
6 640 EQ-5D (EQ-5D-5L). *Qual Life Res* 2011;20(10):1727-36. doi: 10.1007/s11136-011-9903-x [published  
7 641 Online First: 2011/04/12]  
8 642 38. Janssen MF, Pickard AS, Golicki D, et al. Measurement properties of the EQ-5D-5L compared to the EQ-5D-  
9 643 3L across eight patient groups: a multi-country study. *Qual Life Res* 2013;22(7):1717-27. doi:  
10643 10.1007/s11136-012-0322-4 [published Online First: 2012/11/28]  
11644 39. van Hout B, Janssen MF, Feng YS, et al. Interim scoring for the EQ-5D-5L: mapping the EQ-5D-5L to EQ-5D-  
12645 3L value sets. *Value in health : the journal of the International Society for Pharmacoeconomics and*  
13646 *Outcomes Research* 2012;15(5):708-15. doi: 10.1016/j.jval.2012.02.008 [published Online First:  
14647 2012/08/08]  
15648 40. EuroQol Group. EQ-5D 5L | Valuation: Standard value sets [Available from: [https://euroqol.org/eq-5d-](https://euroqol.org/eq-5d-instruments/eq-5d-5l-about/valuation-standard-value-sets/crosswalk-index-value-calculator/)  
17649 [instruments/eq-5d-5l-about/valuation-standard-value-sets/crosswalk-index-value-calculator/](https://euroqol.org/eq-5d-instruments/eq-5d-5l-about/valuation-standard-value-sets/crosswalk-index-value-calculator/)  
18650 accessed 17 December 2019.  
19651 41. Public Health England National general practice profiles [Available from:  
20652 <http://fingertips.phe.org.uk/profile/general-practice/data> accessed August 2019.  
21653 42. Department for Communities and Local Government. The English Indices of Deprivation 2015. *In London:*  
22654 *Department for Communities and Local Government* 2015  
23655 43. Bibby P, Brindley P. Urban and rural area definitions for policy purposes in England and Wales:  
24656 Methodology. *Government Statistical Service, London* 2013  
25657 44. Office for National Statistics. Open Geography Portal. 2016 [Available from:  
27658 <http://geoportal.statistics.gov.uk/> accessed 15 June 2020  
28659 45. Digital N. Hospital Episode Statistics (HES) [11/06/2019]. Available from: [https://digital.nhs.uk/data-and-](https://digital.nhs.uk/data-and-information/data-tools-and-services/data-services/hospital-episode-statistics)  
29660 [information/data-tools-and-services/data-services/hospital-episode-statistics](https://digital.nhs.uk/data-and-information/data-tools-and-services/data-services/hospital-episode-statistics).  
30661 46. Office for National Statistics. Census 2011 [Available from: [www.nomisweb.co.uk/census/2011](http://www.nomisweb.co.uk/census/2011) accessed  
31662 June 9, 2020.  
32663 47. Clemens S, Phelps A, Oldfield Z, et al. English Longitudinal Study of Ageing: Waves 0-8, 1998-2017 2019  
33664 [30th Edition:]  
34665 48. Steptoe A, Breeze E, Banks J, et al. Cohort profile: the English longitudinal study of ageing. *International*  
36666 *journal of epidemiology* 2013;42(6):1640-8. doi: 10.1093/ije/dys168 [published Online First:  
37667 2012/11/13]  
38668 49. Abell J, Amin-Smith N, Banks J, et al. The dynamics of ageing: evidence from the English Longitudinal Study  
39669 of Ageing 2002-2016 (Wave 8): The Institute for Fiscal Studies 2018.  
40670 50. Janssen B, Szende A. Population Norms for the EQ-5D. In: Szende A, Janssen B, Cabases J, eds. Self-  
41671 Reported Population Health: An International Perspective based on EQ-5D. Dordrecht (NL): Springer  
42672 Copyright 2014, The Author(s). 2014:19-30.  
43673 51. Williamson E, Ward L, Vadher K, et al. Better Outcomes for Older people with Spinal Trouble (BOOST) Trial:  
44674 a randomised controlled trial of a combined physical and psychological intervention for older adults  
46675 with neurogenic claudication, a protocol. *BMJ open* 2018;8(10):e022205. doi: 10.1136/bmjopen-2018-  
47676 022205 [published Online First: 2018/10/21]  
48677 52. Galea S, Tracy M. Participation rates in epidemiologic studies. *Annals of epidemiology* 2007;17(9):643-53.  
49678 doi: 10.1016/j.annepidem.2007.03.013 [published Online First: 2007/06/08]  
50679 53. Spencer EA, Appleby PN, Davey GK, et al. Validity of self-reported height and weight in 4808 EPIC-Oxford  
51680 participants. *Public health nutrition* 2002;5(4):561-5. doi: 10.1079/phn2001322 [published Online  
52681 First: 2002/08/21]  
53682 54. Banks J, Nazroo J, Steptoe A, editors. *Evidence from the English Longitudinal Study of Ageing 2002-2012*  
55683 *(Wave 6)*. London: The Institute for Fiscal Studies, 2014.  
56684 55. Banks J, Breeze E, Lessof C, et al. Retirement, health and relationships of the older population in England:  
57685 The 2004 English Longitudinal Study of Ageing. *London: Institute for Fiscal Studies* 2006  
58686  
59  
60

1

2

3

4

5

6

7

8

9

10

11

12

13

14

15

16

17

18

19

20

21

22

23

24

25

26

27

28

29

30

31

32

33

34

35

36

37

38

39

40

41

42

43

44

45

46

47

48

49

50

51

52

53

54

55

56

57

58

59

60

56. Mottram S, Peat G, Thomas E, et al. Patterns of pain and mobility limitation in older people: cross-sectional findings from a population survey of 18,497 adults aged 50 years and over. *Qual Life Res* 2008;17(4):529-39. doi: 10.1007/s11136-008-9324-7
57. Driscoll T, Jacklyn G, Orchard J, et al. The global burden of occupationally related low back pain: estimates from the Global Burden of Disease 2010 study. *Annals of the rheumatic diseases* 2014;73(6):975-81. doi: 10.1136/annrheumdis-2013-204631 [published Online First: 2014/03/26]
58. Guralnik JM, Fried LP, Simonsick EM, et al. The Women's Health and Aging Study: Health and Social Characteristics of Older Women with Disability. Bethesda, MD: National Institute of Aging, 1995.
59. Shuval K, Kohl HW, 3rd, Bernstein I, et al. Sedentary behaviour and physical inactivity assessment in primary care: the Rapid Assessment Disuse Index (RADI) study. *British journal of sports medicine* 2014;48(3):250-5. doi: 10.1136/bjsports-2013-092901 [published Online First: 2013/10/23]
60. Rose SB, Elley CR, Lawton BA, et al. A single question reliably identifies physically inactive women in primary care. *The New Zealand medical journal* 2008;121(1268):U2897. [published Online First: 2008/02/08]
61. Buysse DJ, Reynolds CF, 3rd, Monk TH, et al. The Pittsburgh Sleep Quality Index: a new instrument for psychiatric practice and research. *Psychiatry research* 1989;28(2):193-213. [published Online First: 1989/05/01]
62. Collin C, Wade DT, Davies S, et al. The Barthel ADL Index: a reliability study. *International disability studies* 1988;10(2):61-3. [published Online First: 1988/01/01]
63. Gompertz P, Pound, P., & Ebrahim, S. A postal version of the Barthel Index. *Clinical Rehabilitation*, 8(3), 233-239. *Clinical Rehabilitation* 1994;8(3):233-39.
64. Von Korff M, Ormel J, Keefe F, et al. Grading the severity of chronic pain. *Pain* 1992;50(2):133-49.
65. Syddall HE, Westbury LD, Cooper C, et al. Self-reported walking speed: a useful marker of physical performance among community-dwelling older people? *Journal of the American Medical Directors Association* 2015;16(4):323-8. doi: 10.1016/j.jamda.2014.11.004 [published Online First: 2014/12/20]
66. Chung J, Demiris G, Thompson HJ. Instruments to assess mobility limitation in community-dwelling older adults: a systematic review. *Journal of aging and physical activity* 2015;23(2):298-313. doi: 10.1123/japa.2013-0181 [published Online First: 2014/03/05]
67. Pinto E, Peters R. Literature review of the Clock Drawing Test as a tool for cognitive screening. *Dement Geriatr Cogn Disord* 2009;27(3):201-13. doi: 10.1159/000203344
68. Laidlaw K, Power MJ, Schmidt S. The Attitudes to Ageing Questionnaire (AAQ): development and psychometric properties. *International journal of geriatric psychiatry* 2007;22(4):367-79. doi: 10.1002/gps.1683 [published Online First: 2006/10/20]

1  
2  
3 **721 Tables and Figures**

4  
5 **722 Figure 1.** Locations of the areas from which the OPAL Cohort Study was derived. Map of England  
6  
7 divided by counties.  
8 **723**

9  
10 **724 Figure 2.** Health conditions in men and women of OPAL Cohort Study  
11  
12  
13 **725**

14  
15  
16  
17  
18  
19  
20  
21  
22  
23  
24  
25  
26  
27  
28  
29  
30  
31  
32  
33  
34  
35  
36  
37  
38  
39  
40  
41  
42  
43  
44  
45  
46  
47  
48  
49  
50  
51  
52  
53  
54  
55  
56  
57  
58  
59  
60

For peer review only



**Table 1.** Measures included in the OPAL Cohort Study

| Data collection for the OPAL Cohort Study |                                                                                                                                                                                                                                                                                                                           |           |
|-------------------------------------------|---------------------------------------------------------------------------------------------------------------------------------------------------------------------------------------------------------------------------------------------------------------------------------------------------------------------------|-----------|
| Domain measured                           | Self-reported measure                                                                                                                                                                                                                                                                                                     | Years (Y) |
| Socio-demographic                         | Age, sex, education, relationship status<br>Participation in clubs and groups <sup>54</sup><br>Requires unpaid/paid carer                                                                                                                                                                                                 | Y0-Y5     |
|                                           | Ethnicity<br>Number of live births and stillbirths                                                                                                                                                                                                                                                                        | Y0        |
| Socio-economic                            | Participant and GP Area deprivation obtained from postcodes <sup>42</sup><br>Current work status <sup>55</sup><br>Type of housing<br>Adequacy of income <sup>56</sup>                                                                                                                                                     | Y0-Y5     |
|                                           | Main occupation during lifetime <sup>57</sup> and self-rating of strenuousness of occupation<br>Internet access                                                                                                                                                                                                           | Y0        |
| Lifestyle                                 | Weight<br>Alcohol and smoking <sup>58</sup><br>Current physical activity <sup>59</sup>                                                                                                                                                                                                                                    | Y0-Y5     |
|                                           | Height<br>Lifetime physical activity <sup>60</sup>                                                                                                                                                                                                                                                                        | Y0        |
| General health data                       | Self-reported comorbidities and medication use<br>Sleep quality - Pittsburgh Sleep Quality Index <sup>61</sup> and average number of hours sleep each night<br>Incontinence - 2 items from Barthel Index <sup>62 63</sup><br>Falls in the last 12 months <sup>33</sup><br>Broken bones or fractures in the last 12 months | Y0-Y5     |
| Musculoskeletal symptoms                  | The Nordic Musculoskeletal Questionnaire adapted version <sup>25 26</sup>                                                                                                                                                                                                                                                 | Y0-Y5     |
|                                           | Report of back pain in last 6 weeks, troublesomeness, onset of back pain and nature of back pain <sup>28</sup><br>Leg pain and symptoms related to low back pain<br>Screening questions for neurogenic claudication <sup>29</sup>                                                                                         | Y0-Y5     |
|                                           | Report of knee pain, troublesomeness, interference with daily activity <sup>64</sup>                                                                                                                                                                                                                                      | Y1-Y2     |

| Data collection for the OPAL Cohort Study |                                                                                                                                                                                                                                                                                                               |           |
|-------------------------------------------|---------------------------------------------------------------------------------------------------------------------------------------------------------------------------------------------------------------------------------------------------------------------------------------------------------------|-----------|
| Domain measured                           | Self-reported measure                                                                                                                                                                                                                                                                                         | Years (Y) |
|                                           | Location of knee pain                                                                                                                                                                                                                                                                                         | Y1        |
| Mobility                                  | Change in mobility in the last year.<br>Self-rated walking speed <sup>65</sup><br>Use of walking aids (inside and outside)<br>Mobility concerns<br>Access to transport <sup>54</sup><br>Life-Space assessment <sup>32</sup><br>Single item from the Modified Gait Self-Efficacy Scale (10-item) <sup>31</sup> | Y0-Y5     |
|                                           | Difficulty with balance while walking                                                                                                                                                                                                                                                                         | Y2-Y5     |
|                                           | Difficulties walking a half of mile <sup>66</sup><br>Difficulties walking up and down a flight of stairs <sup>66</sup>                                                                                                                                                                                        | Y3-Y5     |
| Disability                                | Self-reported difficulty with Activities of Daily Living (bathing, transfers, toilet use, dressing and eating)                                                                                                                                                                                                | Y2-Y5     |
| Frailty                                   | Tilburg Frailty Index <sup>34 35</sup>                                                                                                                                                                                                                                                                        | Y0-Y5     |
| Cognition                                 | Clock Drawing Test <sup>67</sup>                                                                                                                                                                                                                                                                              | Y0-Y5     |
| Beliefs about ageing                      | Attitude to ageing questionnaire – physical changes subscale <sup>68</sup>                                                                                                                                                                                                                                    | Y0-Y5     |
| Health related quality of life            | EuroQol 5-Dimension Health Questionnaire, five-level version <sup>37</sup><br>EuroQol-Visual Analog Scale (EQ-VAS) <sup>37</sup>                                                                                                                                                                              | Y0-Y5     |

**Table 2.** Sociodemographic and life-style factors of men and women in the OPAL Cohort Study

| Characteristic                      | Men (n=2,625) | Women (n=2,784) |
|-------------------------------------|---------------|-----------------|
| Age, mean (SD)                      | 74.8 (6.7)    | 75.0 (6.8)      |
| Age groups, n (%)                   |               |                 |
| 65-69                               | 784 (29.9)    | 801 (28.8)      |
| 70-74                               | 696 (26.5)    | 734 (26.4)      |
| 75-79                               | 542 (20.7)    | 618 (22.2)      |
| 80-84                               | 355 (13.5)    | 356 (12.8)      |
| 85-89                               | 196 (7.5)     | 203 (7.3)       |
| 90+                                 | 52 (2.0)      | 72 (2.6)        |
| Ethnicity (White), n (%)            | 2,465 (93.9)  | 2,667 (95.8)    |
| Relationship status, n (%)          |               |                 |
| Married/Civil Union                 | 1,897 (72.3)  | 1,506 (54.1)    |
| Living with Partner                 | 114 (4.3)     | 85 (3.1)        |
| Unmarried (never married)           | 117 (4.5)     | 105 (3.8)       |
| Separated/Divorced                  | 185 (7.1)     | 273 (9.8)       |
| Widow/Widower                       | 305 (11.6)    | 809 (29.1)      |
| Live alone, n (%)                   | 534 (20.3)    | 1,021 (36.7)    |
| Education, n (%)                    |               |                 |
| High professional or university     | 1,017 (38.7)  | 895 (32.2)      |
| Secondary school only               | 1,370 (52.2)  | 1,681 (60.4)    |
| None or primary                     | 219 (8.3)     | 189 (6.8)       |
| Work status (Retired), n (%)        | 2,187 (83.3)  | 2,402 (86.3)    |
| Quintiles of IMD, n (%)             |               |                 |
| Q1 – Most deprived                  | 293 (11.2)    | 289 (10.4)      |
| Q2                                  | 323 (12.3)    | 339 (12.2)      |
| Q3                                  | 542 (20.7)    | 613 (22.0)      |
| Q4                                  | 575 (21.9)    | 591 (21.2)      |
| Q5 – Least deprived                 | 892 (34.0)    | 952 (34.2)      |
| BMI (kg/m <sup>2</sup> ), mean (SD) | 26.8 (4.3)    | 26.4 (5.3)      |
| Smoking status, n (%)               |               |                 |
| Never                               | 1,071 (40.8)  | 1,618 (58.1)    |
| Ex-Smoker                           | 1,401 (53.4)  | 1,040 (37.4)    |
| Current                             | 145 (5.5)     | 118 (4.2)       |
| Cigarettes per day, median (IQR)    | 15 (10-20)    | 10 (5-17)       |
| Alcohol intake once per week, n (%) | 1,861 (70.9)  | 1,361 (48.9)    |

SD=standard deviation; IMD=Index of Multiple Deprivation. Data included older adults 65 years and older at baseline 2016-2018.

**Table 3.** Health-related characteristics of men and women at the OPAL Cohort Study

| Health-related characteristics                              | Men (n=2,625) | Women (n=2,784) |
|-------------------------------------------------------------|---------------|-----------------|
| <b>Musculoskeletal disorders in the last 6 weeks, n (%)</b> |               |                 |
| Low back (small of the back)                                | 1,098 (41.8)  | 1,306 (46.9)    |
| One of both knees                                           | 932 (35.5)    | 1,132 (40.7)    |
| Wrist/hands                                                 | 653 (24.9)    | 1,053 (37.8)    |
| Neck                                                        | 673 (25.6)    | 951 (34.2)      |
| Shoulders                                                   | 667 (25.4)    | 948 (34.1)      |
| One of both hips/thighs                                     | 599 (22.8)    | 875 (31.4)      |
| One or both ankles/feet                                     | 559 (21.3)    | 755 (27.1)      |
| Upper back                                                  | 160 (6.1)     | 346 (12.4)      |
| Elbows                                                      | 161 (6.1)     | 173 (6.2)       |
| Any pain, n (%)                                             | 2,137 (81.4)  | 2,406 (86.4)    |
| <b>Mobility</b>                                             |               |                 |
| Confidence to walk half a mile, median (IQR)                | 10 (9-10)     | 10 (6-10)       |
| Outdoor walking pace, n (%)                                 |               |                 |
| Fast                                                        | 91 (3.5)      | 93 (3.3)        |
| Fairly brisk                                                | 534 (20.3)    | 572 (20.6)      |
| Normal                                                      | 994 (37.9)    | 958 (34.4)      |
| stroll at an easy pace                                      | 647 (24.7)    | 726 (26.1)      |
| Very slow                                                   | 326 (12.4)    | 395 (14.2)      |
| Unable to walk                                              | 19 (0.7)      | 27 (1.0)        |
| Walking rate than 1 year ago, n (%)                         |               |                 |
| Much better                                                 | 52 (2.0)      | 84 (3.0)        |
| Somewhat better                                             | 114 (4.3)     | 101 (3.6)       |
| About the same                                              | 1,822 (69.4)  | 1,831 (65.8)    |
| Somewhat worse                                              | 507 (19.3)    | 622 (22.3)      |
| Much worse                                                  | 113 (4.3)     | 133 (4.8)       |
| Walking aid use inside (Yes), n (%)                         | 108 (4.1)     | 153 (5.5)       |
| Walking aid use outside (Yes), n (%)                        | 306 (11.7)    | 435 (15.6)      |
| <b>Falls in the last year, n (%)</b>                        |               |                 |
| None                                                        | 1,900 (72.4)  | 1,906 (68.5)    |
| One fall                                                    | 474 (18.1)    | 624 (22.4)      |
| More than one fall                                          | 235 (9.0)     | 236 (8.5)       |
| <b>Frailty, Tilburg frailty score, median (IQR)</b>         |               |                 |
|                                                             | 2 (1-4)       | 3 (1-5)         |
| <b>Clock-drawing test, n (%)</b>                            |               |                 |
| 1 point                                                     | 9 (0.3)       | 5 (0.2)         |
| 2 points                                                    | 28 (1.1)      | 45 (1.6)        |
| 3 points                                                    | 112 (4.3)     | 102 (3.7)       |
| 4 points                                                    | 210 (8.0)     | 273 (9.8)       |
| 5 points                                                    | 445 (17.0)    | 487 (17.5)      |
| 6 points                                                    | 1,756 (66.9)  | 1,793 (64.4)    |
| <b>Quality of life</b>                                      |               |                 |
| EQ-5D crosswalk index value, mean (SD)                      | 0.79 (0.19)   | 0.76 (0.21)     |
| EQ-VAS, mean (SD)                                           | 79.1 (16.7)   | 77.7 (18.0)     |

1  
2  
3  
4  
5  
6  
7  
8  
9  
10  
11  
12  
13  
14  
15  
16  
17  
18  
19  
20  
21  
22  
23  
24  
25  
26  
27  
28  
29  
30  
31  
32  
33  
34  
35  
36  
37  
38  
39  
40  
41  
42  
43  
44  
45  
46  
47  
48  
49  
50  
51  
52  
53  
54  
55  
56  
57  
58  
59  
60

Sample sizes may vary due to missing values; data included older adults 65 years and older at baseline 2016-2018.

For peer review only

1  
2  
3  
4  
5  
6  
7  
8  
9  
10  
11  
12  
13  
14  
15  
16  
17  
18  
19  
20  
21  
22  
23  
24  
25  
26  
27  
28  
29  
30  
31  
32  
33  
34  
35  
36  
37  
38  
39  
40  
41  
42  
43  
44  
45  
46  
47  
48  
49  
50  
51  
52  
53  
54  
55  
56  
57  
58  
59  
60

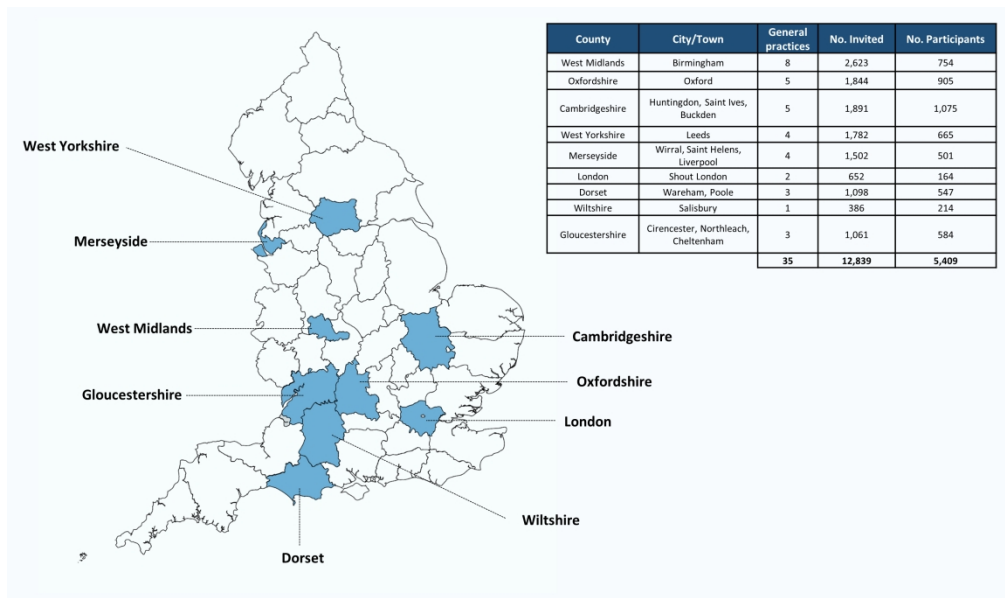

Locations of the areas from which the OPAL Cohort Study was derived. Map of England divided by counties

270x160mm (300 x 300 DPI)

1  
2  
3  
4  
5  
6  
7  
8  
9  
10  
11  
12  
13  
14  
15  
16  
17  
18  
19  
20  
21  
22  
23  
24  
25  
26  
27  
28  
29  
30  
31  
32  
33  
34  
35  
36  
37  
38  
39  
40  
41  
42  
43  
44  
45  
46  
47  
48  
49  
50  
51  
52  
53  
54  
55  
56  
57  
58  
59  
60

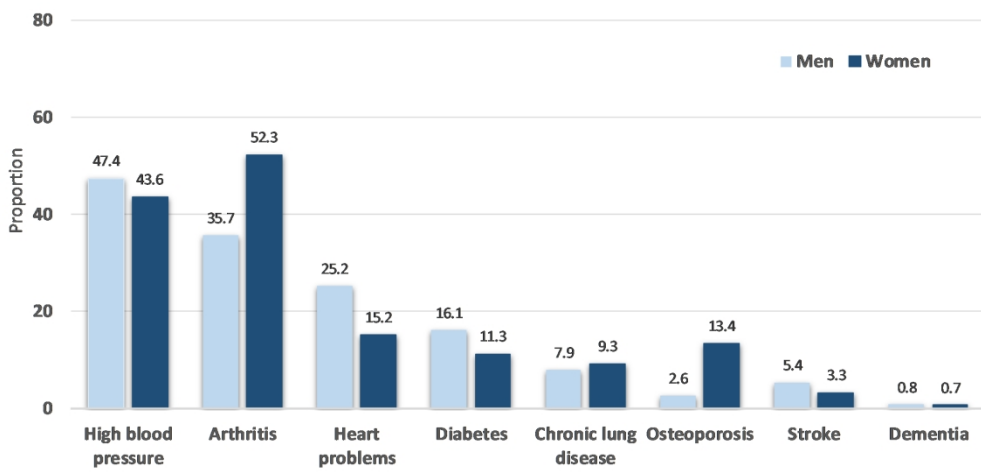

Health conditions in men and women of OPAL Cohort Study

196x101mm (300 x 300 DPI)

**Supplementary Data**

**Supplemental Figure S1.** Flow chart of baseline participants in the OPAL cohort study

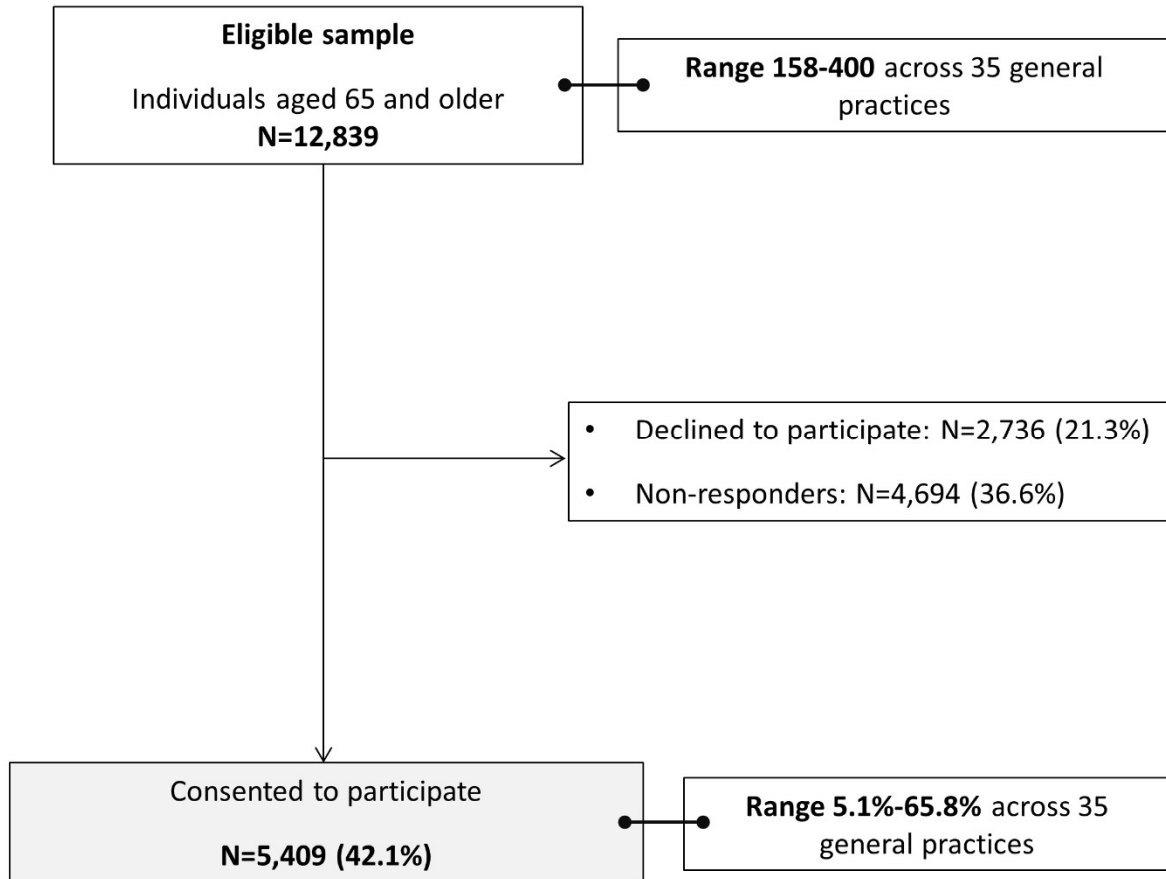

For peer review only



**Supplemental Table S1.** Variables used in the OPAL and the ELSA cohort studies.

| Variable                  | Question(s), answer(s) posed to OPAL study                                                                                                                                       | Question(s), answer(s) posed to ELSA study                                                                                                                                                                                                            | Name (label) of the variable used for the comparison study                                                                                |
|---------------------------|----------------------------------------------------------------------------------------------------------------------------------------------------------------------------------|-------------------------------------------------------------------------------------------------------------------------------------------------------------------------------------------------------------------------------------------------------|-------------------------------------------------------------------------------------------------------------------------------------------|
| age                       | Date of birth and date of completion of questionnaire                                                                                                                            | Age in 5 year bands <ul style="list-style-type: none"> <li>• 65-69</li> <li>• 70-74</li> <li>• 75-79</li> <li>• 80-84</li> <li>• 85+</li> </ul>                                                                                                       | 'age5' (Age variable in 5 year bands)<br>(Derived variable from Institute for fiscal studies (IFS))                                       |
| Sex                       | Gender: Male and Female                                                                                                                                                          | Sex: Male and Female                                                                                                                                                                                                                                  | 'indsex' (Sex variable)                                                                                                                   |
| Work status               | Which of the following best describes your CURRENT work status? <ul style="list-style-type: none"> <li>• Retired</li> </ul>                                                      | Which of the following best describes your CURRENT work status? <ul style="list-style-type: none"> <li>• Retired</li> </ul>                                                                                                                           | 'wpdes' (Best description of current situation)                                                                                           |
| Relationship status       | What is your current relationship status? <ul style="list-style-type: none"> <li>• Married/Civil Union</li> </ul>                                                                | What is your current legal marital status? <ul style="list-style-type: none"> <li>• Married/Civil partner</li> </ul>                                                                                                                                  | 'dimarr' (Marital status - combined marriage/civil partnership)                                                                           |
| Weight                    | What is your weight? <ul style="list-style-type: none"> <li>• In Kilograms</li> </ul>                                                                                            | Weight measurement <ul style="list-style-type: none"> <li>• In Kilograms</li> </ul> Note: Participants with weight of 37 kg or lower were excluded from the analysis of this variable (n=282) due to the lowest cut-off used in the OPAL cohort study | 'estwt' (Final measured or estimated weight (kg))                                                                                         |
| Smoking status            | Which of the following describes your current cigarette smoking status? <ul style="list-style-type: none"> <li>• Never</li> <li>• Ex-smoker</li> <li>• Current smoker</li> </ul> | Smoker status (past or present): <ul style="list-style-type: none"> <li>• Never</li> <li>• Ex-smoker</li> <li>• Current smoker</li> </ul>                                                                                                             | 'smokerstat' (Derived variable from IFS (non-financial))                                                                                  |
| Chronic health conditions | <i>Has your doctor or nurse ever told you that you have any of the following conditions?</i>                                                                                     | <i>Our records show that in the last interview you said that you had been told by a doctor that you had any of the following conditions.</i><br><br><i>Do you still have the condition?</i>                                                           | <i>Diagnosed last interview AND confirms previous chronic condition</i><br><br><i>OR</i><br><i>Chronic condition since last interview</i> |

|                      |                                                                                    | <i>Since last interview, has a doctor ever told you that you have any of the conditions on this card?</i>                                                                                                                                                                          |                                                                                                                                                                                                                                                                                                                                                                                 |
|----------------------|------------------------------------------------------------------------------------|------------------------------------------------------------------------------------------------------------------------------------------------------------------------------------------------------------------------------------------------------------------------------------|---------------------------------------------------------------------------------------------------------------------------------------------------------------------------------------------------------------------------------------------------------------------------------------------------------------------------------------------------------------------------------|
| Heart problems       | <ul style="list-style-type: none"> <li>• Angina or heart troubles</li> </ul>       | <ul style="list-style-type: none"> <li>• Angina</li> <li>• A heart attack (including myocardial infarction or coronary thrombosis)</li> <li>• Congestive heart failure</li> <li>• A heart murmur</li> <li>• An abnormal heart rhythm</li> <li>• Any other heart trouble</li> </ul> | <p><i>Angina:</i> 'hedawan', 'hedacan', 'hediman'</p> <p><i>Heart attach:</i> 'hedawmi', 'hedacmi', 'hedimmi'</p> <p><i>Congestion heart failure:</i> 'hedawhf', 'hedachf', 'hedimhf'</p> <p><i>Heart murmur:</i> 'hedawhm', 'hedachm', 'hedimhm'</p> <p><i>Abnormal heart rhythm:</i> 'hedawar', 'hedacar', 'hedimar'</p> <p><i>Other:</i> 'hedaw95', 'hedac95', 'hedia95'</p> |
| Diabetes             | <ul style="list-style-type: none"> <li>• Diabetes (Types I or II)</li> </ul>       | <ul style="list-style-type: none"> <li>• Diabetes or high blood sugar</li> </ul>                                                                                                                                                                                                   | 'hedawdi', 'hedacdi', 'hedimdi'                                                                                                                                                                                                                                                                                                                                                 |
| High blood pressure  | <ul style="list-style-type: none"> <li>• High blood pressure</li> </ul>            | <ul style="list-style-type: none"> <li>• High blood pressure or hypertension</li> </ul>                                                                                                                                                                                            | 'hedawbp', 'hedacbp', 'hedimbp'                                                                                                                                                                                                                                                                                                                                                 |
| Stroke               | <ul style="list-style-type: none"> <li>• Stroke</li> </ul>                         | <ul style="list-style-type: none"> <li>• A stroke (cerebral vascular disease)</li> </ul>                                                                                                                                                                                           | 'hedawst', 'hedacst', 'hedimst'                                                                                                                                                                                                                                                                                                                                                 |
| Arthritis            | <ul style="list-style-type: none"> <li>• Arthritis</li> </ul>                      | <ul style="list-style-type: none"> <li>• Arthritis (including osteoarthritis, or rheumatism)</li> </ul>                                                                                                                                                                            | 'hedbwar', 'hedbdar', 'hedibar'                                                                                                                                                                                                                                                                                                                                                 |
| Dementia             | <ul style="list-style-type: none"> <li>• Dementia</li> </ul>                       | <ul style="list-style-type: none"> <li>• Dementia, senility, or any other serious memory impairment</li> </ul>                                                                                                                                                                     | 'hedbwde', 'hedbdde', 'hedibde'                                                                                                                                                                                                                                                                                                                                                 |
| Osteoporosis         | <ul style="list-style-type: none"> <li>• Osteoporosis</li> </ul>                   | <ul style="list-style-type: none"> <li>• Osteoporosis, sometimes called thin or brittle bones</li> </ul>                                                                                                                                                                           | 'hedbwos', 'hedbdos', 'hedibos'                                                                                                                                                                                                                                                                                                                                                 |
| Chronic lung disease | <ul style="list-style-type: none"> <li>• Chronic lung disease or Asthma</li> </ul> | <ul style="list-style-type: none"> <li>• Chronic lung disease such as chronic bronchitis or emphysema</li> <li>• Asthma</li> </ul>                                                                                                                                                 | <p><i>Chronic lung disease:</i> 'hedbwlu', 'hedbdlu', 'hediblu'</p> <p><i>Asthma:</i> 'hedbwas', 'hedbdas', 'hedibas'</p>                                                                                                                                                                                                                                                       |

| Variable  | Question, answer(s) posed to OPAL study                                                                                                                                                                                | Question, answer(s) posed to England 2011 Census                                                                                                                                                           | Variable used for the comparison study       |
|-----------|------------------------------------------------------------------------------------------------------------------------------------------------------------------------------------------------------------------------|------------------------------------------------------------------------------------------------------------------------------------------------------------------------------------------------------------|----------------------------------------------|
| Ethnicity | To which of these ethnic groups do you consider you belong? <ul style="list-style-type: none"> <li>• Non-white (Mixed, Indian, Pakistani, Bangladeshi, Black/Black British, Chinese and other ethnic group)</li> </ul> | What is your ethnic group? <ul style="list-style-type: none"> <li>• Non-white (Mixed/multiple ethnic groups, Asian/Asian British, Black/African/Caribbean/Black British and other ethnic group)</li> </ul> | Ethnicity - divided into white and non-white |

**Supplemental Table S2.** Characteristics of OPAL participants and non-participants

| Characteristic        | Eligible<br>(N=12,839) | Responders             |                       | Non-<br>Responders<br>(N=4,694) | Non-<br>participants<br>(N=7,430) |
|-----------------------|------------------------|------------------------|-----------------------|---------------------------------|-----------------------------------|
|                       |                        | Consented<br>(N=5,409) | Declined<br>(N=2,736) |                                 |                                   |
| Age*, mean (SD)       | 75.5 (7.2)             | 74.9 (6.8)             | 77.0 (7.4)            | 75.4 (7.4)                      | 75.9 (7.4)                        |
| Age* groups, n<br>(%) |                        |                        |                       |                                 |                                   |
| 65-69                 | 3,611 (28.1)           | 1,601 (29.6)           | 598 (21.9)            | 1,412 (30.1)                    | 2,010 (27.1)                      |
| 70-74                 | 3,124 (24.3)           | 1,426 (26.4)           | 598 (21.9)            | 1,100 (23.4)                    | 1,698 (22.9)                      |
| 75-79                 | 2,690 (21.0)           | 1,155 (21.4)           | 615 (22.5)            | 920 (19.6)                      | 1,535 (20.7)                      |
| 80+                   | 3,414 (26.6)           | 1,227 (22.7)           | 925 (33.8)            | 1,262 (26.9)                    | 2,187 (29.4)                      |
| Sex, n (%)*           |                        |                        |                       |                                 |                                   |
| Male                  | 5,943 (47.7)           | 2,625 (48.5)           | 1,159 (43.7)          | 2,226 (49.0)                    | 3,385 (47.1)                      |
| Female                | 6,506 (52.3)           | 2,784 (51.5)           | 1,492 (56.3)          | 2,313 (51.0)                    | 3,805 (52.9)                      |

We did not have sex available for one site, so it was excluded for the analysis (N=390).

\*The age of eligible individuals was calculated based on date when the questionnaire was sent and date of birth.

**Supplemental Figure S2.** Age distribution between participants (dark blue) and non-participants (pink) in the OPAL cohort study by general practice.

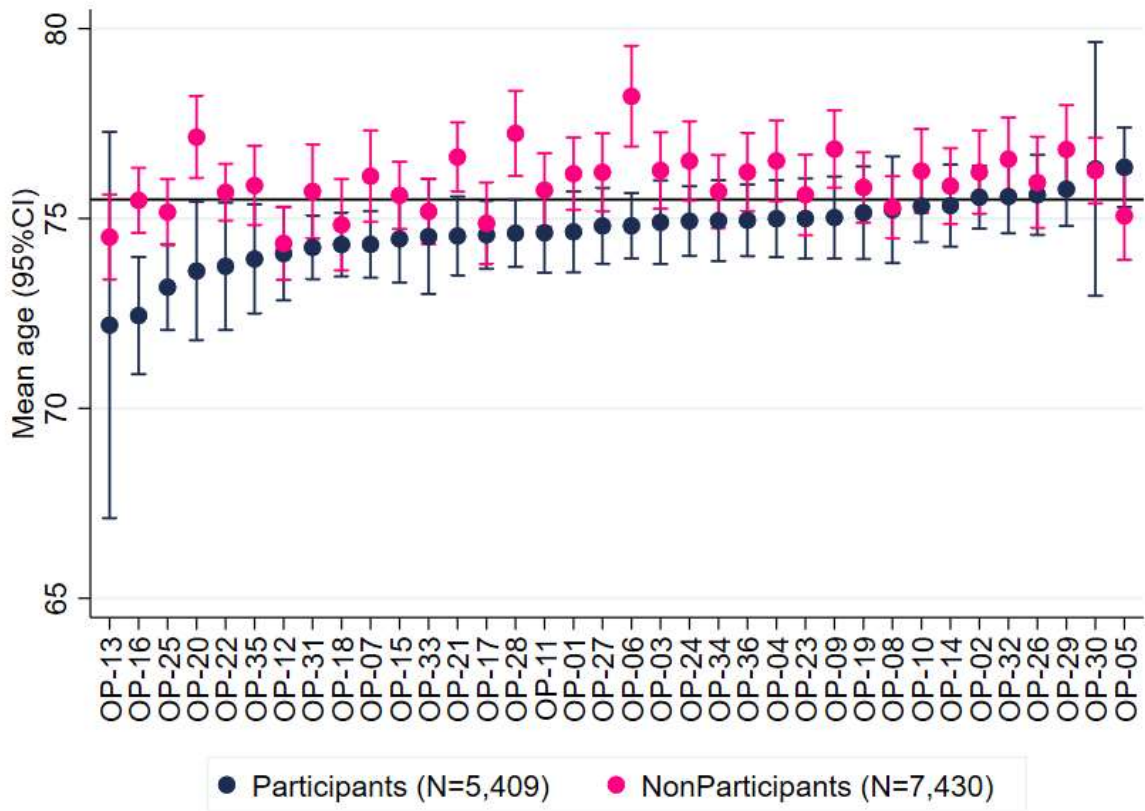

iew only

**Supplemental Figure S3.** Sex distribution between participants (dark blue) and non-participants (pink) in the OPAL cohort study by general practice.

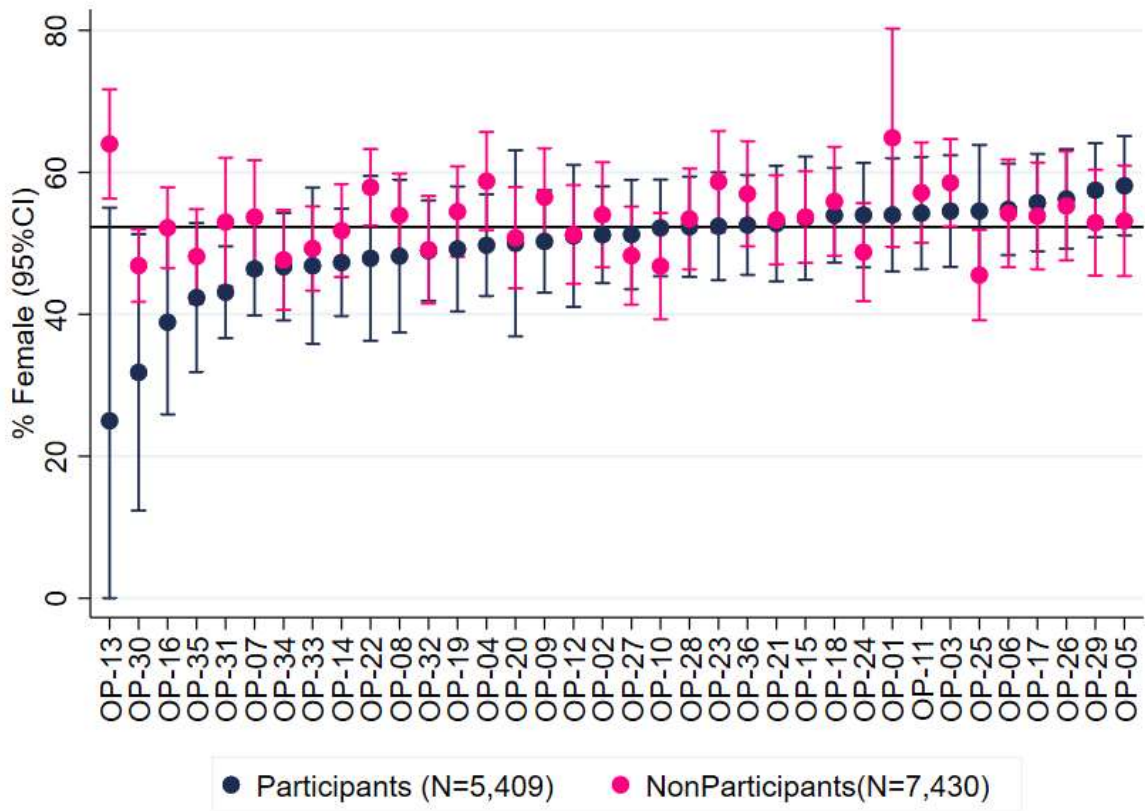

iew only

**Supplemental Table S3.** Area deprivation and ethnicity based on each general practice.

| General practice | Eligible individuals | %Response rate | Practice IMD 2015 decile (1 More deprived to 10 Least deprived) | Estimated proportion of non-white ethnic groups in practice population |        |        |
|------------------|----------------------|----------------|-----------------------------------------------------------------|------------------------------------------------------------------------|--------|--------|
|                  |                      |                |                                                                 | %Mixed                                                                 | %Asian | %Black |
| OP-01            | 390                  | 38.5%          | -                                                               | -                                                                      | -      | -      |
| OP-02            | 381                  | 54.3%          | 10                                                              | 2.3                                                                    | 5.8    | 1.8    |
| OP-03            | 400                  | 38.5%          | 4                                                               | 4.4                                                                    | 12.8   | 4.1    |
| OP-04            | 381                  | 49.1%          | 10                                                              | 2.1                                                                    | 5.0    | 1.7    |
| OP-05            | 349                  | 54.7%          | 10                                                              | 3.4                                                                    | 9.1    | 1.8    |
| OP-06            | 396                  | 58.1%          | 10                                                              | 1.7                                                                    | 2.1    | 1.3    |
| OP-07            | 371                  | 59.8%          | 10                                                              | 1.4                                                                    | 3.6    | 0.0    |
| OP-08            | 361                  | 23.0%          | 1                                                               | 6.9                                                                    | 36.8   | 21.3   |
| OP-09            | 385                  | 48.1%          | 5                                                               | 4.6                                                                    | 15.7   | 4.0    |
| OP-10            | 378                  | 54.8%          | 10                                                              | 1.1                                                                    | 1.1    | 0.0    |
| OP-11            | 342                  | 44.7%          | 6                                                               | 4.3                                                                    | 12.7   | 6.8    |
| OP-12            | 295                  | 32.5%          | 2                                                               | 4.7                                                                    | 6.1    | 5.0    |
| OP-13            | 158                  | 5.1%           | 1                                                               | 3.9                                                                    | 62.0   | 19.1   |
| OP-14            | 391                  | 42.7%          | 6                                                               | 4.4                                                                    | 13.9   | 6.5    |
| OP-15            | 356                  | 35.7%          | 2                                                               | 2.5                                                                    | 5.9    | 2.7    |
| OP-16            | 351                  | 15.4%          | 1                                                               | 6.1                                                                    | 31.4   | 16.7   |
| OP-17            | 370                  | 54.3%          | 7                                                               | 2.2                                                                    | 5.3    | 2.0    |
| OP-18            | 376                  | 57.2%          | 10                                                              | 1.4                                                                    | 3.7    | 0.0    |
| OP-19            | 359                  | 34.5%          | 5                                                               | 4.4                                                                    | 10.9   | 6.3    |
| OP-20            | 245                  | 22.9%          | 6                                                               | 2.2                                                                    | 7.4    | 3.4    |
| OP-21            | 386                  | 37.3%          | 3                                                               | 0.0                                                                    | 1.1    | 0.0    |
| OP-22            | 394                  | 18.0%          | 1                                                               | 1.5                                                                    | 2.5    | 1.7    |
| OP-23/36*        | 350/366              | 47.4%/53.0%    | 8                                                               | 2.0                                                                    | 3.2    | 0.0    |
| OP-24            | 377                  | 46.7%          | 7                                                               | 0.0                                                                    | 1.2    | 0.0    |
| OP-25            | 345                  | 31.9%          | 3                                                               | 3.9                                                                    | 15.2   | 4.4    |
| OP-26            | 353                  | 54.4%          | 8                                                               | 0.0                                                                    | 0.0    | 0.0    |
| OP-27            | 363                  | 44.6%          | -                                                               | -                                                                      | -      | -      |
| OP-28            | 382                  | 50.5%          | 10                                                              | 0.0                                                                    | 1.2    | 0.0    |
| OP-29            | 396                  | 55.4%          | 9                                                               | 1.0                                                                    | 1.8    | 0.0    |
| OP-30            | 389                  | 5.7%           | -                                                               | -                                                                      | -      | -      |
| OP-31            | 342                  | 65.8%          | 8                                                               | 0.0                                                                    | 1.1    | 0.0    |
| OP-32            | 359                  | 53.5%          | 9                                                               | 0.0                                                                    | 0.0    | 0.0    |
| OP-33            | 351                  | 22.5%          | 4                                                               | 7.2                                                                    | 26.9   | 33.8   |
| OP-34            | 360                  | 46.4%          | 8                                                               | 1.4                                                                    | 2.8    | 0.0    |
| OP-35            | 301                  | 28.2%          | 3                                                               | 7.2                                                                    | 29.6   | 28.2   |

IMD=Index of Multiple deprivation. 8 general practices had a response rate below (red) and 13 above (green) to the expected rate (<30% and >50%, respectively). Information found on the following government website: <https://fingertips.phe.org.uk/profile/general-practice> (Accessed August 2019). \*Two different random samples of individuals were selected from the same general practice.

**Supplemental Table S4.** Age and ethnicity distribution in the OPAL and population estimates 2011 Census in England by sex

|                      | OPAL (Observed %) |                 |                 | 2011 England Census (%) |                     |                     |
|----------------------|-------------------|-----------------|-----------------|-------------------------|---------------------|---------------------|
|                      | Overall           | Female          | Male            | Overall                 | Female              | Male                |
| Age                  |                   |                 |                 |                         |                     |                     |
| 65-69                | 29.3              | 28.8            | 29.9            | 29.0                    | 26.8                | 31.7                |
| 70-74                | 26.4              | 26.4            | 26.5            | 23.6                    | 22.3                | 25.2                |
| 75-79                | 21.5              | 22.2            | 20.7            | 19.3                    | 19.0                | 19.7                |
| 80 and over          | 22.8              | 22.7            | 23.0            | 28.2                    | 31.9                | 23.5                |
| Ethnicity, non-white | 5.1               | 4.1             | 6.0             | 4.7                     | 4.5                 | 5.1                 |
| <i>N</i>             | 5,409             | 2,784<br>(51.5) | 2,625<br>(48.5) | 8,660,529               | 4,815,690<br>(55.6) | 3,844,839<br>(44.4) |

The 2011 England Census data were collected from: <https://www.ons.gov.uk/>



**Supplemental Table S5.** Characteristics of **women** in the OPAL and ELSA cohort studies by age groups

| Characteristics        | OPAL (Observed %) |             |             |             | ELSA (Estimated % [95%CI]) |                  |                  |                  |
|------------------------|-------------------|-------------|-------------|-------------|----------------------------|------------------|------------------|------------------|
|                        | 65-69             | 70-74       | 75-79       | 80+         | 65-69                      | 70-74            | 75-79            | 80+              |
| Relationship status    |                   |             |             |             |                            |                  |                  |                  |
| Married/Civil Union    | 66.0              | 62.5        | 52.4        | 30.7        | 69.0 [65.8-72.1]           | 64.6 [60.8-68.2] | 54.9 [50.4-59.2] | 30.1 [26.6-33.9] |
| Work status, Retired   | 75.9              | 87.3        | 92.7        | 91.9        | 77.3 [74.2-80.0]           | 88.5 [85.7-90.8] | 90.2 [87.3-92.6] | 93.2 [91.1-94.9] |
| Weight (kg), mean (SD) | 70.7 (14.8)       | 69.7 (14.7) | 68.4 (13.1) | 65.2 (13.0) | 73.9 [72.8-75.1]           | 72.8 [71.5-74.1] | 70.3 [69.0-71.6] | 66.2 [65.0-67.4] |
| Smoking status,        |                   |             |             |             |                            |                  |                  |                  |
| Ex-Smoker              | 38.3              | 40.2        | 35.3        | 34.9        | 46.7 [43.3-50.2]           | 56.8 [52.9-60.7] | 49.8 [45.3-54.2] | 53.5 [49.5-57.4] |
| Current                | 5.2               | 4.8         | 5.0         | 1.6         | 11.6 [9.5-14.1]            | 9.1 [7.0-11.8]   | 7.1 [4.9-10.1]   | 3.9 [2.6-5.9]    |
| Health conditions,     |                   |             |             |             |                            |                  |                  |                  |
| Heart problems         | 8.6               | 12.4        | 15.7        | 27.7        | 18.5 [16.0-21.4]           | 21.2 [18.1-24.6] | 25.7 [22.0-29.7] | 34.3 [30.6-38.2] |
| Diabetes               | 8.7               | 11.3        | 11.5        | 14.3        | 11.4 [9.3-13.8]            | 14.1 [11.6-17.1] | 13.4 [10.6-16.7] | 16.9 [14.1-20.2] |
| High Blood pressure    | 32.5              | 42.4        | 48.7        | 54.4        | 36.5 [33.2-39.9]           | 41.3 [37.5-45.3] | 50.7 [46.2-55.1] | 57.6 [53.6-61.4] |
| Stroke                 | 2.1               | 2.2         | 2.9         | 6.7         | 3.3 [2.3-4.8]              | 4.3 [2.9-6.2]    | 7.8 [5.7-10.6]   | 11.2 [9.0-13.9]  |
| Arthritis              | 45.6              | 51.8        | 55.0        | 58.6        | 49.9 [46.4-53.3]           | 54.3 [50.4-58.2] | 58.3 [53.8-62.6] | 62.4 [58.4-66.1] |
| Dementia               | 0.1               | 0.3         | 0.7         | 1.7         | 0.3 [0.1-1.1]              | 1.5 [0.8-2.8]    | 1.5 [0.7-3.2]    | 5.7 [4.1-7.8]    |
| Osteoporosis           | 9.7               | 11.0        | 15.2        | 19.2        | 13.6 [11.4-16.2]           | 18.1 [15.2-21.4] | 16.8 [13.8-20.4] | 21.2 [18.2-24.6] |
| Chronic lung disease   | 10.1              | 9.4         | 10.2        | 7.1         | 6.8 [5.3-8.8]              | 8.2 [6.3-10.7]   | 8.7 [6.4-11.7]   | 6.1 [4.6-8.2]    |
| <i>Unweighted N</i>    | 801               | 734         | 618         | 631         | 888                        | 679              | 534              | 720              |

ELSA=The English Longitudinal Study of Ageing, a national probability sample of non-institutionalised older people. Wave 8 (2016-2017) was used for this analysis. For variable definitions, see Supplemental Table S1 and for ELSA data management, see Stata do-file "Data\_management\_wave8\_Dec2019.do". Data were weighted to correct for non-response in the ELSA cohort study

**Supplemental Table S6.** Characteristics of men in the OPAL and ELSA cohort studies by age groups

| Characteristics        | OPAL (Observed %) |             |             |             | ELSA (Estimated % [95%CI]) |                  |                  |                  |
|------------------------|-------------------|-------------|-------------|-------------|----------------------------|------------------|------------------|------------------|
|                        | 65-69             | 70-74       | 75-79       | 80+         | 65-69                      | 70-74            | 75-79            | 80+              |
| Relationship status    |                   |             |             |             |                            |                  |                  |                  |
| Married/Civil Union    | 75.8              | 75.9        | 72.1        | 63.7        | 76.5 [72.9-79.8]           | 78.0 [74.3-81.2] | 72.6 [68.1-76.7] | 64.2 [59.6-68.6] |
| Work status, Retired   | 71.1              | 81.8        | 90.6        | 94.5        | 74.1 [70.5-77.5]           | 88.0 [85.2-90.4] | 93.9 [91.3-95.8] | 97.3 [95.4-98.4] |
| Weight (kg), mean (SD) | 85.0 (15.6)       | 83.7 (15.4) | 81.5 (13.8) | 78.1 (12.6) | 87.3 [86.0-88.7]           | 84.5 [83.1-85.8] | 81.6 [80.3-83.0] | 78.6 [77.3-79.8] |
| Smoking status,        |                   |             |             |             |                            |                  |                  |                  |
| Ex-Smoker              | 49.0              | 54.0        | 55.4        | 56.4        | 61.8 [57.8-65.6]           | 64.0 [59.9-67.9] | 66.9 [62.2-71.3] | 75.0 [70.8-78.7] |
| Current                | 8.8               | 5.2         | 4.6         | 2.5         | 9.7 [7.4-12.6]             | 10.2 [7.7-13.2]  | 8.2 [5.9-11.4]   | 2.3 [1.3-4.0]    |
| Health conditions,     |                   |             |             |             |                            |                  |                  |                  |
| Heart problems         | 18.4              | 25.0        | 27.7        | 32.2        | 20.2 [17.1-23.7]           | 28.5 [24.9-32.4] | 35.1 [30.6-39.8] | 40.2 [35.8-44.9] |
| Diabetes               | 16.1              | 15.4        | 16.1        | 17.1        | 14.5 [11.8-17.6]           | 18.0 [14.9-21.5] | 19.4 [15.7-23.7] | 15.6 [12.5-19.2] |
| High Blood pressure    | 44.3              | 48.7        | 48.0        | 49.4        | 39.5 [35.6-43.5]           | 47.5 [43.4-51.6] | 49.8 [45.0-54.6] | 51.9 [47.2-56.5] |
| Stroke                 | 2.9               | 4.2         | 6.6         | 8.8         | 5.2 [3.6-7.4]              | 6.6 [4.8-9.1]    | 8.7 [6.3-11.7]   | 16.8 [13.5-20.6] |
| Arthritis              | 31.1              | 32.6        | 37.5        | 43.5        | 31.6 [27.9-35.4]           | 37.0 [33.1-41.1] | 40.6 [36.0-45.4] | 41.5 [37.0-46.2] |
| Dementia               | 0.4               | 0.4         | 0.7         | 2.0         | 0.5 [0.2-1.6]              | 1.7 [0.8-3.3]    | 2.3 [1.2-4.4]    | 4.9 [3.3-7.3]    |
| Osteoporosis           | 1.4               | 2.3         | 3.5         | 3.7         | 2.0 [1.2-3.5]              | 5.7 [4.0-8.1]    | 3.6 [2.1-5.9]    | 3.5 [2.1-5.7]    |
| Chronic lung disease   | 7.5               | 7.8         | 7.9         | 8.3         | 7.4 [5.4-10.0]             | 10.2 [7.9-13.1]  | 11.6 [8.8-15.2]  | 8.1 [5.9-10.9]   |
| <i>Unweighted N</i>    | 784               | 696         | 542         | 603         | 659                        | 624              | 458              | 503              |

ELSA=The English Longitudinal Study of Ageing, a national probability sample of non-institutionalised older people. Wave 8 (2016-2017) was used for this analysis. For variable definitions, see Supplemental Table S1 and for ELSA data management, see Stata do-file "Data\_management\_wave8\_Dec2019.do". Data were weighted to correct for non-response in the ELSA cohort study

1  
2  
3  
4  
5  
6  
7  
8  
9  
10  
11  
12  
13  
14  
15  
16  
17  
18  
19  
20  
21  
22  
23  
24  
25  
26  
27  
28  
29  
30  
31  
32  
33  
34  
35  
36  
37  
38  
39  
40  
41  
42  
43  
44  
45  
46  
47  
48  
49  
50  
51  
52  
53  
54  
55  
56  
57  
58  
59  
60

For peer review only

```

1 *****
2 * University of Oxford
1 3 * ELSA
2 4 * December 2019
3 *****
4 6
4 7 *Data: wave_8_elsa_data_eul_v2.dta
5 8
6 9 *Variables needed for health comparison from Wave 8
7 10 *Identifier
8 11 * idauniq Variable label = Unique individual serial number
9 12 * idahhw8 Variable label = Analytical wave-specific individual
10 13 * perid Variable label = Person ID
11 14 * samptyp Variable label = Sampling status
12 15 * w8xwgt Variable label = Wave 8 cross-sectional weight
13 16 * w8indout Variable label = Individual outcome code
14 17
14 18 *Demography
15 19 * Derived variables are denoted with "(D)" at the beginning of the variable label:
16 20 * indager Variable label = (D) Definitive age variable collapsed at 90+: priority diag,
17 dhage
18 21 * indsex Variable label = (D) Definitive sex variable: priority disex, dhsex
19 22 * fqethnmr Variable label = (D) Ethnicity recoded into white and non-white (consolidated)
20 23 * wpdes Variable label = Best description of current situation (retired)
21 24 * dimarr Variable label = (D) Respondent current legal marital status - combined
21 marriage/civil partnership
22 25 * estwt Variable label = (D) Weight: final measured or estimated weight (kg)
23 26
24 27 *Health-related variables
25 28 *--Heart problems
26 29 *Angina
27 30 * hedawan Variable label = Diagnosed angina fed forward
28 31 * hedacan Variable label = Whether confirms angina diagnosis
29 32 * hediman Variable label = Cardiovascular disease: angina diagnosis newly reported
29 (merged)
30 33 *Heart attack
31 34 * hedawmi Variable label = Diagnosed heart attack fed forward
32 35 * hedacmi Variable label = Whether confirms heart attack diagnosis
33 36 * hedimmi Variable label = Cardiovascular disease: heart attack diagnosis newly
33 reported (merged)
34 37 *Congestive heart failure
35 38 * hedawhf Variable label = Diagnosed congestive heart failure fed forward
36 39 * hedachf Variable label = Whether confirms congestive heart failure diagnosis
37 40 * hedimhf Variable label = Cardiovascular disease: congestive heart failure diagnosis
38 newly reported (merged)
39 41 *Heart murmur
40 42 * hedawhm Variable label = Diagnosed heart murmur fed forward
41 43 * hedachm Variable label = Whether confirms heart murmur diagnosis
42 44 * hedimhm Variable label = Cardiovascular disease: heart murmur diagnosis newly
42 reported (merged)
43 45 *Abnormal heart rhythm
44 46 * hedawar Variable label = Diagnosed abnormal heart rhythm fed forward
45 47 * hedacar Variable label = Whether confirms abnormal heart rhythm diagnosis
46 48 * hedimar Variable label = Cardiovascular disease: abnormal heart rhythm diagnosis
47 newly reported (merged)
48 49 *Other heart disease
49 50 * hedaw95 Variable label = Diagnosed other heart disease fed forward
50 51 * hedac95 Variable label = Whether confirms other heart disease diagnosis
51 52
52 53 *--Diabetes
53 54 *Diabetes or high blood sugar
54 55 * hedawdi Variable label = Diagnosed diabetes or high blood sugar fed forward
55 56 * hedacdi Variable label = Whether confirms diabetes or high blood sugar diagnosis
56 57 * hedimdi Variable label = Cardiovascular disease: diabetes or high blood sugar
57 diagnosis newly reported (merged)
58 58 *--High blood pressure
59 59 *High blood pressure
60 60 * hedawbp Variable label = Diagnosed high blood pressure fed forward
61 61 * hedacbp Variable label = Whether confirms high blood pressure diagnosis
62 62 * hedimbp Variable label = Cardiovascular disease: high blood pressure diagnosis newly
62 reported (merged)
63 *--Stroke
64 *Stroke
65 * hedawst Variable label = Diagnosed stroke fed forward
66 * hedacst Variable label = Whether confirms stroke diagnosis

```

```

67 * hedimst Variable label = Cardiovascular disease: stroke diagnosis newly reported
    (merged)
1 68 *--Arthritis
2 69 *Arthritis
3 70 * hedbwar Variable label = Chronic: diagnosed arthritis fed forward
4 71 * hedbdar Variable label = Whether confirms arthritis diagnosis
5 72 * hedibar Variable label = Chronic: arthritis diagnosis newly reported
6 73 *--Osteoporosis
7 74 *Osteoporosis
8 75 * hedbwos Variable label = Chronic: diagnosed osteoporosis fed forward
9 76 * hedbdos Variable label = Whether confirms osteoporosis diagnosis
10 77 * hedibos Variable label = Chronic: osteoporosis diagnosis newly reported
11 78 *--Dementia
12 79 *Dementia
13 80 * hedbwde Variable label = Chronic: diagnosed dementia fed forward
14 81 * hedbdde Variable label = Whether confirms dementia diagnosis
15 82 * hedibde Variable label = Chronic: dementia diagnosis newly reported
16 83 *--Chronic lung disease
17 84 *Chronic lung disease
18 85 * hedbwlu Variable label = Chronic: diagnosed lung disease fed forward
19 86 * hedbdlu Variable label = Whether confirms lung disease diagnosis
20 87 * hediblu Variable label = Chronic: lung disease diagnosis newly reported
21 88 *Asthma
22 89 * hedbwas Variable label = Chronic: diagnosed asthma fed forward
23 90 * hedbdas Variable label = Whether confirms asthma diagnosis
24 91 * hedibas Variable label = Chronic: asthma diagnosis newly reported
25 92
26 93 *****
27 94
28 95 *Data: wave_8_elsa_data_eul_v2.dta ((IFS derived databaset))
29 96
30 97 *Variables needed for health comparison from Wave 8
31 98 *Identifier
32 99 * idauniq Variable label = Unique individual serial number
33 100 * idahhw8 Variable label = Analytical wave-specific individual
34 101 * w8xwgt Variable label = Wave 8 cross-sectional weight
35 102
36 103 *Demography
37 104 * ageg5 Variable label = age band - 5 year bands (8 way split)
38 105 * sex Variable label = sex: copy of indsex/dhsex
39 106 * elsa Variable label = Sampling status
40 107 * inst Variable label = whether in an institution
41 108 * nonwhite Variable label = ethic origin (white/non-white)
42 109 * marstat Variable label = marital status - couple1 combined with dimar
43 110 * smoker Variable label = whether current smoker
44 111 * smokerstat Variable label = smoker status (past or present)
45 112
46 113
47 114 *****
48 115 version 15.1
49 116 clear all
50 117
51 118 cd "\Data" /* Change working directory */
52 119
53 120 *---REVIEWERS COMMENTS.
54 121
55 122 use "wave_8_elsa_data_eul_v2.dta", clear
56 123 tab indsex
57 124 /* 8445 */
58 125
59 126 keep idauniq idahhw8 perid samptyp w8xwgt indager indsex fqethnmr wpdes dimarr estwt
60 127 hedawan hedacan hediman hedacmi hedacmi hedimmi ///
    hedawhf hedachf hedimhf hedachm hedimhm hedawar hedacar hedimar hedaw95
    hedac95 hedia95 hedawdi hedacdi hedimdi ///
    hedawbp hedacbp hedimbp hedawst hedacst hedimst hedbwar hedbdar hedibar hedbwos
    hedbdos hedibos ///
    hedbwde hedbdde hedibde hedbwlu hedbdlu hediblu hedbwas hedbdas hedibas
133 tab _merge
134 drop _merge
135 save "ELSA Comparison.dta", replace
136

```

```

137 tab indsex
138 /* 8445 */
139
140 *-----
141 *---EXCLUSION CRITERIA
142 *- 1. Noncore members (elsa=0 or samptyp=)
143 *- 2. Younger than 65 (age<65)
144 *- 3. Living in an institution (inst=1)
145
146 *N=8,445
147
148 *-CORE MEMBERS
149 tab1 elsa samptyp, m
150 tab samptyp elsa
151 *N=7,223
152
153 *-AGE
154 tab ageg5, m
155 *N=5,478
156
157
158 *-LIVING IN A INSTITUTION
159 tab inst, m
160 *N=58
161 *N=8,387
162
163 gen exclusion=1 if inst==1
164 replace exclusion=2 if ageg5<4
165 replace exclusion=3 if elsa==0
166 label var exclusion "Exclusion criteria"
167 label define exclusion 1 "Living in a institution" 2"Aged<65" 3"NoCore Members", replace
168 label values exclusion exclusion
169 tab exclusion, m
170
171
172 keep if exclusion==.
173 *N=5,065
174
175 ***CLEANING AND TRANSFORMING VARIABLES
176
177 *ID
178 rename idauniq id
179 gen psu=id
180
181 *-AGE INTO 5 YEAR BANDS
182 tab ageg5, m
183
184 gen w8age4g=ageg5
185 recode w8age4g 4=1 5=2 6=3 7=4 8=4
186 label var w8age4g "Age into 4 groups"
187 label define w8age4g 1 "65-69" 2 "70-74" 3"75-79" 4"80 or more", replace
188 label values w8age4g w8age4g
189 tab w8age4g, m
190
191 tab w8age4g ageg5, m
192 drop ageg5
193
194 *-SEX
195 tab indsex
196
197 rename indsex w8sex
198
199 *1=male; 2=female
200 label var w8sex "Sex"
201
202 label define w8sex 1 "Male" 2 "Female", replace
203 label values w8sex w8sex
204 tab w8sex
205
206 *-ETHNICITY
207 tab fqethnmr nonwhite, m
208
209 rename fqethnmr w8white
210 recode w8white 1=1 2=0
211

```

```

212 *-MARITAL STATUS
213 tab dimarr, m
1214 gen w8marstat=0
215 replace w8marstat=1 if dimarr==2 | dimarr==3
216 replace w8marstat=. if dimarr==8
3217 label var w8marstat "Current legal marital status - Married/civil partnership yes/no"
4218 label define w8marstat 0"Other" 1"Married/civil", replace
5219 label values w8marstat w8marstat
6220 tab w8marstat
7221
8222 *-WORK STATUS
9223 tab wpdes, m
10224
11225 gen w8retired=0
1226 replace w8retired=1 if wpdes==1
13227 label define w8retired 0"Other" 1"Retired", replace
14228 label values w8retired w8retired
15229 label var w8retired "Best description of current situation - Retired yes/no"
1630 tab w8retired
1731
1832 *-WEIGHT
19233 replace estwt=. if estwt<38 /***** CUT-OFF USED IN OPAL study *****/
20234
21235 rename estwt w8weightKg
2236
2337 *-SMOKE
2438 tab smokerstat smoker
2539 tab smokerstat, m
2640
27241 gen w8smokerstat=.
28242 replace w8smokerstat=1 if smokerstat==0
29243 replace w8smokerstat=2 if smokerstat==1 | smokerstat==2 | smokerstat==3
30244 replace w8smokerstat=3 if smokerstat==4
31245 lab define w8smokerstat 1"Never smoker" 2"Ex-smoker" 3"Current smoker", replace
32246 label values w8smokerstat w8smokerstat
33247 label variable w8smokerstat "Cigarette smoking status"
3448
35249 tab w8smokerstat, m
3650
3751 *--HEALTH-RELATED FACTORS
3852
3953 *Angina: 'hedawan', 'hedacan', 'hediman'
4054 *Heart attach: 'hedawmi', 'hedacmi', 'hedimmi'
4155 *Congestion heart failure: 'hedawhf', 'hedachf', 'hedimhf'
4256 *Heart murmur: 'hedawhm', 'hedachm', 'hedimhm'
4357 *Abnormal heart rhythm: 'hedawar', 'hedacar', 'hedimar'
4458 *Other: 'hedaw95', 'hedac95', 'hedia95'
4559
4660 *-ANGINA
47261 tab1 hedawan hedacan hediman
48262 gen w8angina=0
49263 replace w8angina=1 if (hedawan==2 & hedacan==1) | hediman==1
50264 replace w8angina=. if hediman<0 & w8angina!=1
51265
52266 *-HEART ATTACK
53267 tab1 hedawmi hedacmi hedimmi
54268 gen w8heartattack=0 if hedawmi==1
55269 replace w8heartattack=1 if (hedawmi==3 & hedacmi==1) | hedimmi==1
56270 replace w8heartattack=. if hedimmi<0 & w8heartattack!=1
57271
58272 *-CONGESTION HEART FAILURE
59273 tab1 hedawhf hedachf hedimhf
60274 gen w8heartfailure=0
61275 replace w8heartfailure=1 if (hedawhf==4 & hedachf==1) | hedimhf==1
62276 replace w8heartfailure=. if hedimhf<0 & w8heartfailure!=1
63277
64278 *-HEART MURMUR
65279 tab1 hedawhm hedachm hedimhm
66280 gen w8heartmurmur=0
67281 replace w8heartmurmur=1 if (hedawhm==5 & hedachm==1) | hedimhm==1
68282 replace w8heartmurmur=. if hedimhm<0 & w8heartmurmur!=1
69283
70284 *-ABNORMAL HEART RHYTHM
71285 tab1 hedawar hedacar hedimar
72286 gen w8heartrhythm=0

```

```

287 replace w8heartrhythm=1 if (hedawar==6 & hedacar==1) | hedimar==1
288 replace w8heartrhythm=. if hedimar<0 & w8heartrhythm!=1
1289
290 *-OTHER
291 tab1 hedaw95 hedac95 hedia95
292 gen w8otherheartproblem=0
4 293 replace w8otherheartproblem=1 if (hedaw95==95 & hedac95==1) | hedia95==1
5 294 replace w8otherheartproblem=. if hedia95<0 & w8otherheartproblem!=1
6 295
7 296 *-HEART PROBLEMS
8 297 gen w8hearttroubles=0
9 298 replace w8hearttroubles=1 if w8angina==1 | w8heartattack==1 | w8heartfailure==1 |
10 w8heartmurmur==1 | w8heartrhythm==1 | w8otherheartproblem==1
11 299 replace w8hearttroubles=. if w8angina==. & w8heartattack==. & w8heartfailure==. &
12 w8heartmurmur==. & w8heartrhythm==. & w8otherheartproblem==.
13 300
14 301 *-DIABETES
15 302 tab1 hedawdi hedacdi hedimdi
16 303 gen w8diabetes=0
17 304 replace w8diabetes=1 if (hedawdi==7 & hedacdi==1) | hedimdi==1
18 305 replace w8diabetes=. if hedimdi<0 & w8diabetes!=1
19 306
20 307 *-HIGH BLOOD PRESSURE
21 308 tab1 hedawbp hedacbp hedimbp
22 309 gen w8hbp=0
23 310 replace w8hbp=1 if (hedawbp==1 & hedacbp==1) | hedimbp==1
24 311 replace w8hbp=. if hedimbp<0 & w8hbp!=1
25 312
26 313 *-STROKE
27 314 tab1 hedawst hedacst hedimst
28 315 gen w8stroke=0
29 316 replace w8stroke=1 if (hedawst==8 & hedacst==1) | hedimst==1
30 317 replace w8stroke=. if hedimst<0 & w8stroke!=1
31 318 tab w8stroke
32 319
33 320 *-ARTHRITIS
34 321 tab1 hedbwar hedbdar hedibar
35 322 gen w8arthritis=0
36 323 replace w8arthritis=1 if (hedbwar==3 & hedbdar==1) | hedibar==1
37 324 replace w8arthritis=. if hedibar<0 & w8arthritis!=1
38 325
39 326 *-DEMENTIA
40 327 tab1 hedbwde hedbdde hedibde
41 328 gen w8dementia=0
42 329 replace w8dementia=1 if (hedbwde==9 & hedbdde==1) | hedibde==1
43 330 replace w8dementia=. if hedibde<0 & w8dementia!=1
44 331
45 332 *-OSTEOPOROSIS
46 333 tab1 hedbwos hedbdos hedibos
47 334 gen w8osp=0
48 335 replace w8osp=1 if (hedbwos==4 & hedbdos==1) | hedibos==1
49 336 replace w8osp=. if hedibos<0 & w8osp!=1
50 337
51 338 *-CHRONIC LUNG DISEASE
52 339 tab1 hedbwlu hedbdlu hediblu
53 340 gen w8lungdisease=0
54 341 replace w8lungdisease=1 if (hedbwlu==1 & hedbdlu==1) | hediblu==1
55 342 replace w8lungdisease=. if hediblu<0 & w8lungdisease!=1
56 343
57 344 *-ASTHMA
58 345 tab1 hedbwas hedbdas hedibas
59 346
60 347 gen w8asthma=0
61 348 replace w8asthma=1 if (hedbwas==1 & hedbdas==1) | hedibas==1
62 349 replace w8asthma=. if hedibas<0 & w8asthma!=1
63 350
64 351 *-CHRONIC LUNG DISEASE + ASTHMA
65 352 gen w8cld=0
66 353 replace w8cld=1 if w8lungdisease==1 | w8asthma==1
67 354 replace w8cld=. if w8lungdisease==. & w8asthma==.
68 355
69 356 /***** ANALYSIS WITH WEIGHTED DATA *****/
70 357
71 358 svyset, clear
72 359 svyset [pweight=w8wgt], psu(psu)

```



```
360
361
1362 /***** FEMALE *****/
2363
3364 unab xvars: w8white w8marstat w8retired w8smokerstat w8hearttroubles w8diabetes w8hbp
w8stroke w8arthritis w8dementia w8osp w8cld
4365 foreach x of local xvars {
5366 svy:tab `x' w8age4g if w8sex==2, col per ci
6367 }
7368
8369 *---Weight (Kg)
9370 forvalues i = 1/4 {
10371 svy:mean w8weightKg if w8sex==2 & w8age4g==`i'
11372 }
12373
1374 *---Unweighted N
14375 tab w8age4g if w8sex==2
15376
16377 /***** MALE *****/
17378 unab xvars: w8white w8marstat w8retired w8smokerstat w8hearttroubles w8diabetes w8hbp
w8stroke w8arthritis w8dementia w8osp w8cld
18380 foreach x of local xvars {
19381 svy:tab `x' w8age4g if w8sex==1, col per ci
20382 }
21383
2284 *---Weight (Kg)
2385 forvalues i = 1/4 {
24386 svy:mean w8weightKg if w8sex==1 & w8age4g==`i'
25387 }
26388
27389 *---Unweighted N
28390 tab w8age4g if w8sex==1
29391
30
31
32
33
34
35
36
37
38
39
40
41
42
43
44
45
46
47
48
49
50
51
52
53
54
55
56
57
58
59
60
```
