# Supplementary material for: Cohort profile: Oxford Pain, Activity and Lifestyle (OPAL) Study, a prospective cohort study of older adults in England
Source: PubMed Central journal article supplement (PMC7473632; doi:10.1136/bmjopen-2020-037516), 2020-09-03
Supplement: bmjopen-2020-037516supp001.pdf [file bmjopen-2020-037516supp001.pdf]

## Supplementary Data

**Supplemental Figure S1.** Flow chart of baseline participants in the OPAL cohort study

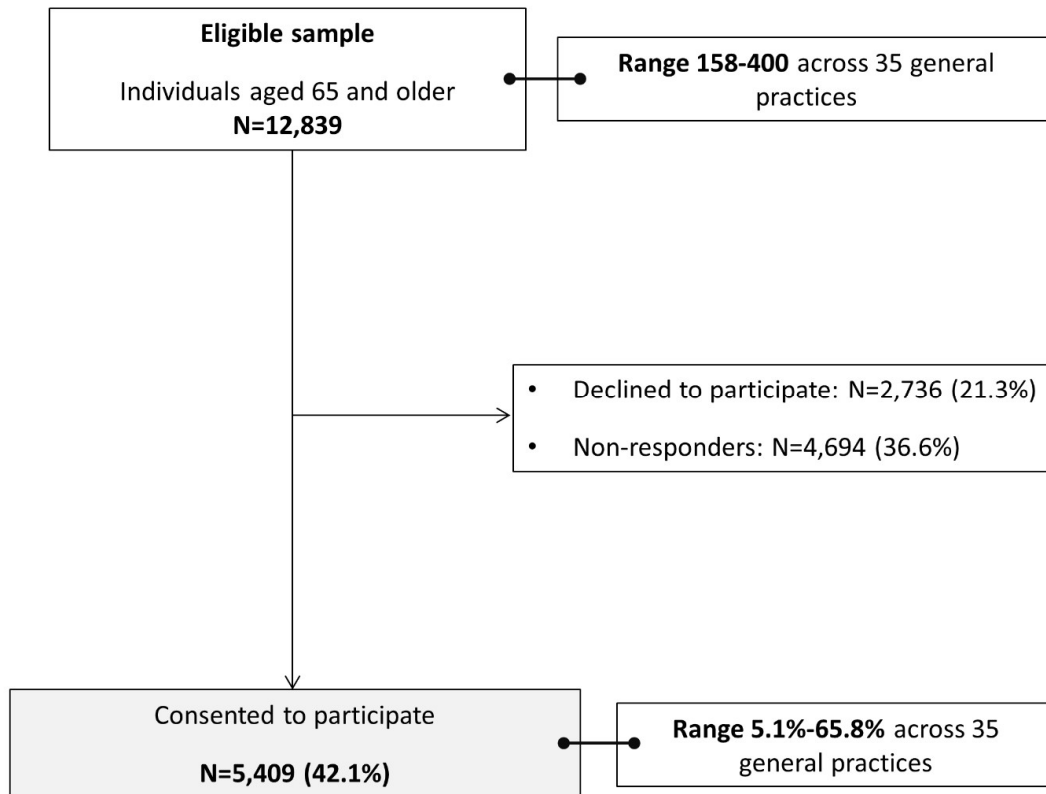

**Supplemental Table S1.** Variables used in the OPAL and the ELSA cohort studies.

| Variable                  | Question(s), answer(s) posed to OPAL study                                                                                                                                       | Question(s), answer(s) posed to ELSA study                                                                                                                                                                                                            | Name (label) of the variable used for the comparison study                                                                                |
|---------------------------|----------------------------------------------------------------------------------------------------------------------------------------------------------------------------------|-------------------------------------------------------------------------------------------------------------------------------------------------------------------------------------------------------------------------------------------------------|-------------------------------------------------------------------------------------------------------------------------------------------|
| age                       | Date of birth and date of completion of questionnaire                                                                                                                            | Age in 5 year bands <ul style="list-style-type: none"> <li>• 65-69</li> <li>• 70-74</li> <li>• 75-79</li> <li>• 80-84</li> <li>• 85+</li> </ul>                                                                                                       | 'ageg5' (Age variable in 5 year bands) (Derived variable from Institute for fiscal studies (IFS))                                         |
| Sex                       | Gender: Male and Female                                                                                                                                                          | Sex: Male and Female                                                                                                                                                                                                                                  | 'indsex' (Sex variable)                                                                                                                   |
| Work status               | Which of the following best describes your CURRENT work status? <ul style="list-style-type: none"> <li>• Retired</li> </ul>                                                      | Which of the following best describes your CURRENT work status? <ul style="list-style-type: none"> <li>• Retired</li> </ul>                                                                                                                           | 'wpdes' (Best description of current situation)                                                                                           |
| Relationship status       | What is your current relationship status? <ul style="list-style-type: none"> <li>• Married/Civil Union</li> </ul>                                                                | What is your current legal marital status? <ul style="list-style-type: none"> <li>• Married/Civil partner</li> </ul>                                                                                                                                  | 'dimarr' (Marital status - combined marriage/civil partnership)                                                                           |
| Weight                    | What is your weight? <ul style="list-style-type: none"> <li>• In Kilograms</li> </ul>                                                                                            | Weight measurement <ul style="list-style-type: none"> <li>• In Kilograms</li> </ul> Note: Participants with weight of 37 kg or lower were excluded from the analysis of this variable (n=282) due to the lowest cut-off used in the OPAL cohort study | 'estwt' (Final measured or estimated weight (kg))                                                                                         |
| Smoking status            | Which of the following describes your current cigarette smoking status? <ul style="list-style-type: none"> <li>• Never</li> <li>• Ex-smoker</li> <li>• Current smoker</li> </ul> | Smoker status (past or present): <ul style="list-style-type: none"> <li>• Never</li> <li>• Ex-smoker</li> <li>• Current smoker</li> </ul>                                                                                                             | 'smokerstat' (Derived variable from IFS (non-financial))                                                                                  |
| Chronic health conditions | <i>Has your doctor or nurse ever told you that you have any of the following conditions?</i>                                                                                     | <i>Our records show that in the last interview you said that you had been told by a doctor that you had any of the following conditions.</i><br><br><i>Do you still have the condition?</i>                                                           | <i>Diagnosed last interview AND confirms previous chronic condition</i><br><br><i>OR</i><br><i>Chronic condition since last interview</i> |

|                      |                                                                                    | <i>Since last interview, has a doctor ever told you that you have any of the conditions on this card?</i>                                                                                                                                                                          |                                                                                                                                                                                                                                                                                                                                                                                 |
|----------------------|------------------------------------------------------------------------------------|------------------------------------------------------------------------------------------------------------------------------------------------------------------------------------------------------------------------------------------------------------------------------------|---------------------------------------------------------------------------------------------------------------------------------------------------------------------------------------------------------------------------------------------------------------------------------------------------------------------------------------------------------------------------------|
| Heart problems       | <ul style="list-style-type: none"> <li>• Angina or heart troubles</li> </ul>       | <ul style="list-style-type: none"> <li>• Angina</li> <li>• A heart attack (including myocardial infarction or coronary thrombosis)</li> <li>• Congestive heart failure</li> <li>• A heart murmur</li> <li>• An abnormal heart rhythm</li> <li>• Any other heart trouble</li> </ul> | <p><i>Angina:</i> 'hedawan', 'hedacan', 'hediman'</p> <p><i>Heart attach:</i> 'hedawmi', 'hedacmi', 'hedimmi'</p> <p><i>Congestion heart failure:</i> 'hedawhf', 'hedachf', 'hedimhf'</p> <p><i>Heart murmur:</i> 'hedawhm', 'hedachm', 'hedimhm'</p> <p><i>Abnormal heart rhythm:</i> 'hedawar', 'hedacar', 'hedimar'</p> <p><i>Other:</i> 'hedaw95', 'hedac95', 'hedia95'</p> |
| Diabetes             | <ul style="list-style-type: none"> <li>• Diabetes (Types I or II)</li> </ul>       | <ul style="list-style-type: none"> <li>• Diabetes or high blood sugar</li> </ul>                                                                                                                                                                                                   | 'hedawdi', 'hedacdi', 'hedimdi'                                                                                                                                                                                                                                                                                                                                                 |
| High blood pressure  | <ul style="list-style-type: none"> <li>• High blood pressure</li> </ul>            | <ul style="list-style-type: none"> <li>• High blood pressure or hypertension</li> </ul>                                                                                                                                                                                            | 'hedawbp', 'hedacbp', 'hedimbp'                                                                                                                                                                                                                                                                                                                                                 |
| Stroke               | <ul style="list-style-type: none"> <li>• Stroke</li> </ul>                         | <ul style="list-style-type: none"> <li>• A stroke (cerebral vascular disease)</li> </ul>                                                                                                                                                                                           | 'hedawst', 'hedacst', 'hedimst'                                                                                                                                                                                                                                                                                                                                                 |
| Arthritis            | <ul style="list-style-type: none"> <li>• Arthritis</li> </ul>                      | <ul style="list-style-type: none"> <li>• Arthritis (including osteoarthritis, or rheumatism)</li> </ul>                                                                                                                                                                            | 'hedbwar', 'hedbdar', 'hedibar'                                                                                                                                                                                                                                                                                                                                                 |
| Dementia             | <ul style="list-style-type: none"> <li>• Dementia</li> </ul>                       | <ul style="list-style-type: none"> <li>• Dementia, senility, or any other serious memory impairment</li> </ul>                                                                                                                                                                     | 'hedbwde', 'hedbdde', 'hedibde'                                                                                                                                                                                                                                                                                                                                                 |
| Osteoporosis         | <ul style="list-style-type: none"> <li>• Osteoporosis</li> </ul>                   | <ul style="list-style-type: none"> <li>• Osteoporosis, sometimes called thin or brittle bones</li> </ul>                                                                                                                                                                           | 'hedbwos', 'hedbdos', 'hedibos'                                                                                                                                                                                                                                                                                                                                                 |
| Chronic lung disease | <ul style="list-style-type: none"> <li>• Chronic lung disease or Asthma</li> </ul> | <ul style="list-style-type: none"> <li>• Chronic lung disease such as chronic bronchitis or emphysema</li> <li>• Asthma</li> </ul>                                                                                                                                                 | <p><i>Chronic lung disease:</i> 'hedbwlu', 'hedbdlu', 'hediblu'</p> <p><i>Asthma:</i> 'hedbwas', 'hedbdas', 'hedibas'</p>                                                                                                                                                                                                                                                       |

| <b>Variable</b> | <b>Question, answer(s) posed to OPAL study</b>                                                                                                                                                                       | <b>Question, answer(s) posed to England 2011 Census</b>                                                                                                                                                  | <b>Variable used for the comparison study</b> |
|-----------------|----------------------------------------------------------------------------------------------------------------------------------------------------------------------------------------------------------------------|----------------------------------------------------------------------------------------------------------------------------------------------------------------------------------------------------------|-----------------------------------------------|
| Ethnicity       | To which of these ethnic groups do you consider you belong? <ul style="list-style-type: none"><li>• Non-white (Mixed, Indian, Pakistani, Bangladeshi, Black/Black British, Chinese and other ethnic group)</li></ul> | What is your ethnic group? <ul style="list-style-type: none"><li>• Non-white (Mixed/multiple ethnic groups, Asian/Asian British, Black/African/Caribbean/Black British and other ethnic group)</li></ul> | Ethnicity - divided into white and non-white  |

**Supplemental Table S2.** Characteristics of OPAL participants and non-participants

| Characteristic     | Eligible<br>(N=12,839) | Responders             |                       | Non-<br>Responders<br>(N=4,694) | Non-<br>participants<br>(N=7,430) |
|--------------------|------------------------|------------------------|-----------------------|---------------------------------|-----------------------------------|
|                    |                        | Consented<br>(N=5,409) | Declined<br>(N=2,736) |                                 |                                   |
| Age*, mean (SD)    | 75.5 (7.2)             | 74.9 (6.8)             | 77.0 (7.4)            | 75.4 (7.4)                      | 75.9 (7.4)                        |
| Age* groups, n (%) |                        |                        |                       |                                 |                                   |
| 65-69              | 3,611 (28.1)           | 1,601 (29.6)           | 598 (21.9)            | 1,412 (30.1)                    | 2,010 (27.1)                      |
| 70-74              | 3,124 (24.3)           | 1,426 (26.4)           | 598 (21.9)            | 1,100 (23.4)                    | 1,698 (22.9)                      |
| 75-79              | 2,690 (21.0)           | 1,155 (21.4)           | 615 (22.5)            | 920 (19.6)                      | 1,535 (20.7)                      |
| 80+                | 3,414 (26.6)           | 1,227 (22.7)           | 925 (33.8)            | 1,262 (26.9)                    | 2,187 (29.4)                      |
| Sex, n (%)*        |                        |                        |                       |                                 |                                   |
| Male               | 5,943 (47.7)           | 2,625 (48.5)           | 1,159 (43.7)          | 2,226 (49.0)                    | 3,385 (47.1)                      |
| Female             | 6,506 (52.3)           | 2,784 (51.5)           | 1,492 (56.3)          | 2,313 (51.0)                    | 3,805 (52.9)                      |

We did not have sex available for one site, so it was excluded for the analysis (N=390).

\*The age of eligible individuals was calculated based on date when the questionnaire was sent and date of birth.

**Supplemental Figure S2.** Age distribution between participants (dark blue) and non-participants (pink) in the OPAL cohort study by general practice.

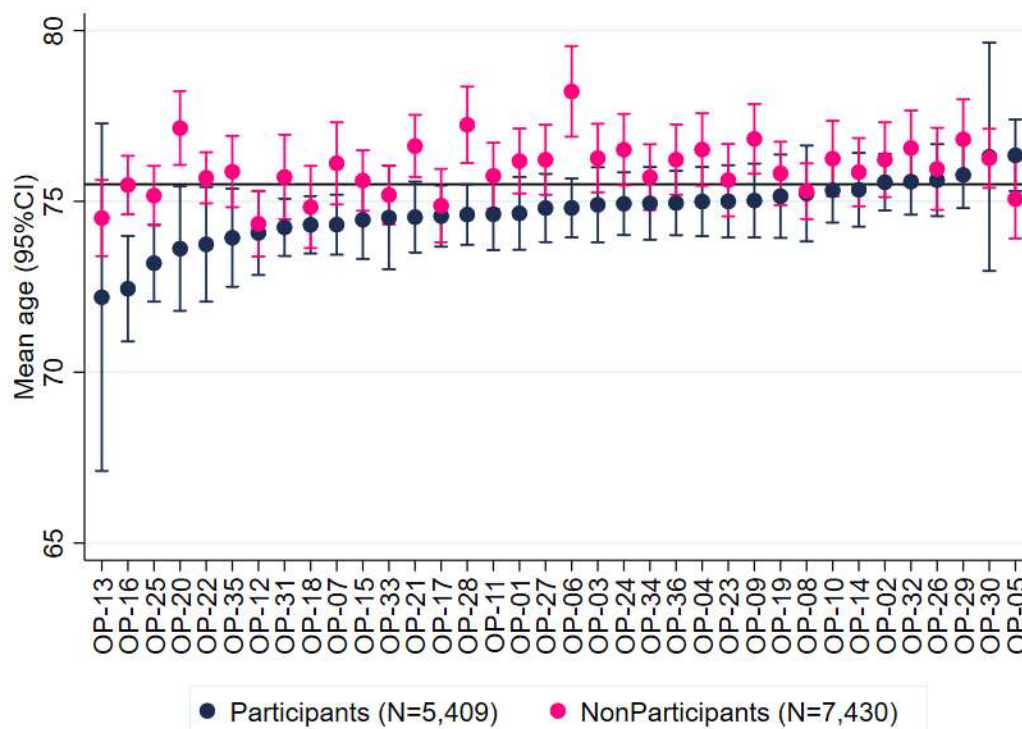

**Supplemental Figure S3.** Sex distribution between participants (dark blue) and non-participants (pink) in the OPAL cohort study by general practice.

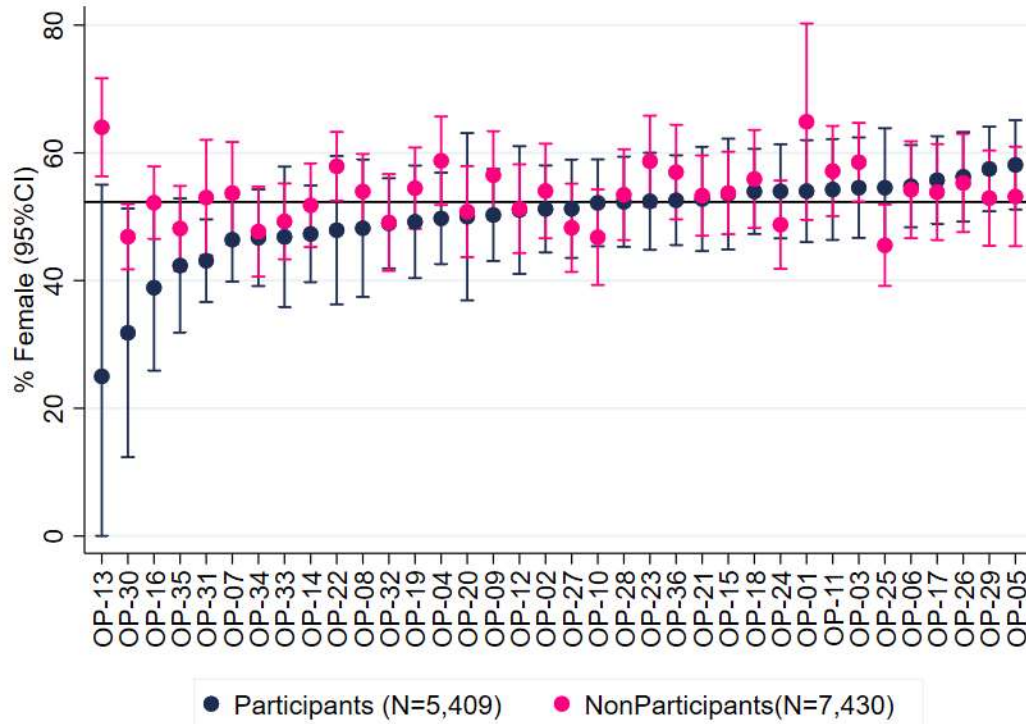

**Supplemental Table S3.** Area deprivation and ethnicity based on each general practice.

| General practice | Eligible individuals | %Response rate | Practice IMD 2015 decile (1 More deprived to 10 Least deprived) | Estimated proportion of non-white ethnic groups in practice population |        |        |
|------------------|----------------------|----------------|-----------------------------------------------------------------|------------------------------------------------------------------------|--------|--------|
|                  |                      |                |                                                                 | %Mixed                                                                 | %Asian | %Black |
| OP-01            | 390                  | 38.5%          | -                                                               | -                                                                      | -      | -      |
| OP-02            | 381                  | 54.3%          | 10                                                              | 2.3                                                                    | 5.8    | 1.8    |
| OP-03            | 400                  | 38.5%          | 4                                                               | 4.4                                                                    | 12.8   | 4.1    |
| OP-04            | 381                  | 49.1%          | 10                                                              | 2.1                                                                    | 5.0    | 1.7    |
| OP-05            | 349                  | 54.7%          | 10                                                              | 3.4                                                                    | 9.1    | 1.8    |
| OP-06            | 396                  | 58.1%          | 10                                                              | 1.7                                                                    | 2.1    | 1.3    |
| OP-07            | 371                  | 59.8%          | 10                                                              | 1.4                                                                    | 3.6    | 0.0    |
| OP-08            | 361                  | 23.0%          | 1                                                               | 6.9                                                                    | 36.8   | 21.3   |
| OP-09            | 385                  | 48.1%          | 5                                                               | 4.6                                                                    | 15.7   | 4.0    |
| OP-10            | 378                  | 54.8%          | 10                                                              | 1.1                                                                    | 1.1    | 0.0    |
| OP-11            | 342                  | 44.7%          | 6                                                               | 4.3                                                                    | 12.7   | 6.8    |
| OP-12            | 295                  | 32.5%          | 2                                                               | 4.7                                                                    | 6.1    | 5.0    |
| OP-13            | 158                  | 5.1%           | 1                                                               | 3.9                                                                    | 62.0   | 19.1   |
| OP-14            | 391                  | 42.7%          | 6                                                               | 4.4                                                                    | 13.9   | 6.5    |
| OP-15            | 356                  | 35.7%          | 2                                                               | 2.5                                                                    | 5.9    | 2.7    |
| OP-16            | 351                  | 15.4%          | 1                                                               | 6.1                                                                    | 31.4   | 16.7   |
| OP-17            | 370                  | 54.3%          | 7                                                               | 2.2                                                                    | 5.3    | 2.0    |
| OP-18            | 376                  | 57.2%          | 10                                                              | 1.4                                                                    | 3.7    | 0.0    |
| OP-19            | 359                  | 34.5%          | 5                                                               | 4.4                                                                    | 10.9   | 6.3    |
| OP-20            | 245                  | 22.9%          | 6                                                               | 2.2                                                                    | 7.4    | 3.4    |
| OP-21            | 386                  | 37.3%          | 3                                                               | 0.0                                                                    | 1.1    | 0.0    |
| OP-22            | 394                  | 18.0%          | 1                                                               | 1.5                                                                    | 2.5    | 1.7    |
| OP-23/36*        | 350/366              | 47.4%/53.0%    | 8                                                               | 2.0                                                                    | 3.2    | 0.0    |
| OP-24            | 377                  | 46.7%          | 7                                                               | 0.0                                                                    | 1.2    | 0.0    |
| OP-25            | 345                  | 31.9%          | 3                                                               | 3.9                                                                    | 15.2   | 4.4    |
| OP-26            | 353                  | 54.4%          | 8                                                               | 0.0                                                                    | 0.0    | 0.0    |
| OP-27            | 363                  | 44.6%          | -                                                               | -                                                                      | -      | -      |
| OP-28            | 382                  | 50.5%          | 10                                                              | 0.0                                                                    | 1.2    | 0.0    |
| OP-29            | 396                  | 55.4%          | 9                                                               | 1.0                                                                    | 1.8    | 0.0    |
| OP-30            | 389                  | 5.7%           | -                                                               | -                                                                      | -      | -      |
| OP-31            | 342                  | 65.8%          | 8                                                               | 0.0                                                                    | 1.1    | 0.0    |
| OP-32            | 359                  | 53.5%          | 9                                                               | 0.0                                                                    | 0.0    | 0.0    |
| OP-33            | 351                  | 22.5%          | 4                                                               | 7.2                                                                    | 26.9   | 33.8   |
| OP-34            | 360                  | 46.4%          | 8                                                               | 1.4                                                                    | 2.8    | 0.0    |
| OP-35            | 301                  | 28.2%          | 3                                                               | 7.2                                                                    | 29.6   | 28.2   |

IMD=Index of Multiple deprivation. 8 general practices had a response rate below (red) and 13 above (green) to the expected rate (<30% and >50%, respectively). Information found on the following government website: <https://fingertips.phe.org.uk/profile/general-practice> (Accessed August 2019). \*Two different random samples of individuals were selected from the same general practice.



**Supplemental Table S4.** Age and ethnicity distribution in the OPAL and population estimates 2011 Census in England by sex

|                      | OPAL (Observed %) |                 |                 | 2011 England Census (%) |                     |                     |
|----------------------|-------------------|-----------------|-----------------|-------------------------|---------------------|---------------------|
|                      | Overall           | Female          | Male            | Overall                 | Female              | Male                |
| Age                  |                   |                 |                 |                         |                     |                     |
| 65-69                | 29.3              | 28.8            | 29.9            | 29.0                    | 26.8                | 31.7                |
| 70-74                | 26.4              | 26.4            | 26.5            | 23.6                    | 22.3                | 25.2                |
| 75-79                | 21.5              | 22.2            | 20.7            | 19.3                    | 19.0                | 19.7                |
| 80 and over          | 22.8              | 22.7            | 23.0            | 28.2                    | 31.9                | 23.5                |
| Ethnicity, non-white | 5.1               | 4.1             | 6.0             | 4.7                     | 4.5                 | 5.1                 |
| <i>N</i>             | 5,409             | 2,784<br>(51.5) | 2,625<br>(48.5) | 8,660,529               | 4,815,690<br>(55.6) | 3,844,839<br>(44.4) |

The 2011 England Census data were collected from: <https://www.ons.gov.uk/>

**Supplemental Table S5.** Characteristics of **women** in the OPAL and ELSA cohort studies by age groups

| Characteristics        | OPAL (Observed %) |             |             |             | ELSA (Estimated % [95%CI]) |                  |                  |                  |
|------------------------|-------------------|-------------|-------------|-------------|----------------------------|------------------|------------------|------------------|
|                        | 65-69             | 70-74       | 75-79       | 80+         | 65-69                      | 70-74            | 75-79            | 80+              |
| Relationship status    |                   |             |             |             |                            |                  |                  |                  |
| Married/Civil Union    | 66.0              | 62.5        | 52.4        | 30.7        | 69.0 [65.8-72.1]           | 64.6 [60.8-68.2] | 54.9 [50.4-59.2] | 30.1 [26.6-33.9] |
| Work status, Retired   | 75.9              | 87.3        | 92.7        | 91.9        | 77.3 [74.2-80.0]           | 88.5 [85.7-90.8] | 90.2 [87.3-92.6] | 93.2 [91.1-94.9] |
| Weight (kg), mean (SD) | 70.7 (14.8)       | 69.7 (14.7) | 68.4 (13.1) | 65.2 (13.0) | 73.9 [72.8-75.1]           | 72.8 [71.5-74.1] | 70.3 [69.0-71.6] | 66.2 [65.0-67.4] |
| Smoking status,        |                   |             |             |             |                            |                  |                  |                  |
| Ex-Smoker              | 38.3              | 40.2        | 35.3        | 34.9        | 46.7 [43.3-50.2]           | 56.8 [52.9-60.7] | 49.8 [45.3-54.2] | 53.5 [49.5-57.4] |
| Current                | 5.2               | 4.8         | 5.0         | 1.6         | 11.6 [9.5-14.1]            | 9.1 [7.0-11.8]   | 7.1 [4.9-10.1]   | 3.9 [2.6-5.9]    |
| Health conditions,     |                   |             |             |             |                            |                  |                  |                  |
| Heart problems         | 8.6               | 12.4        | 15.7        | 27.7        | 18.5 [16.0-21.4]           | 21.2 [18.1-24.6] | 25.7 [22.0-29.7] | 34.3 [30.6-38.2] |
| Diabetes               | 8.7               | 11.3        | 11.5        | 14.3        | 11.4 [9.3-13.8]            | 14.1 [11.6-17.1] | 13.4 [10.6-16.7] | 16.9 [14.1-20.2] |
| High Blood pressure    | 32.5              | 42.4        | 48.7        | 54.4        | 36.5 [33.2-39.9]           | 41.3 [37.5-45.3] | 50.7 [46.2-55.1] | 57.6 [53.6-61.4] |
| Stroke                 | 2.1               | 2.2         | 2.9         | 6.7         | 3.3 [2.3-4.8]              | 4.3 [2.9-6.2]    | 7.8 [5.7-10.6]   | 11.2 [9.0-13.9]  |
| Arthritis              | 45.6              | 51.8        | 55.0        | 58.6        | 49.9 [46.4-53.3]           | 54.3 [50.4-58.2] | 58.3 [53.8-62.6] | 62.4 [58.4-66.1] |
| Dementia               | 0.1               | 0.3         | 0.7         | 1.7         | 0.3 [0.1-1.1]              | 1.5 [0.8-2.8]    | 1.5 [0.7-3.2]    | 5.7 [4.1-7.8]    |
| Osteoporosis           | 9.7               | 11.0        | 15.2        | 19.2        | 13.6 [11.4-16.2]           | 18.1 [15.2-21.4] | 16.8 [13.8-20.4] | 21.2 [18.2-24.6] |
| Chronic lung disease   | 10.1              | 9.4         | 10.2        | 7.1         | 6.8 [5.3-8.8]              | 8.2 [6.3-10.7]   | 8.7 [6.4-11.7]   | 6.1 [4.6-8.2]    |
| <i>Unweighted N</i>    | 801               | 734         | 618         | 631         | 888                        | 679              | 534              | 720              |

ELSA=The English Longitudinal Study of Ageing, a national probability sample of non-institutionalised older people. Wave 8 (2016-2017) was used for this analysis. For variable definitions, see Supplemental Table S1 and for ELSA data management, see Stata do-file "Data\_management\_wave8\_Dec2019.do". Data were weighted to correct for non-response in the ELSA cohort study

**Supplemental Table S6.** Characteristics of men in the OPAL and ELSA cohort studies by age groups

| Characteristics        | OPAL (Observed %) |             |             |             | ELSA (Estimated % [95%CI]) |                  |                  |                  |
|------------------------|-------------------|-------------|-------------|-------------|----------------------------|------------------|------------------|------------------|
|                        | 65-69             | 70-74       | 75-79       | 80+         | 65-69                      | 70-74            | 75-79            | 80+              |
| Relationship status    |                   |             |             |             |                            |                  |                  |                  |
| Married/Civil Union    | 75.8              | 75.9        | 72.1        | 63.7        | 76.5 [72.9-79.8]           | 78.0 [74.3-81.2] | 72.6 [68.1-76.7] | 64.2 [59.6-68.6] |
| Work status, Retired   | 71.1              | 81.8        | 90.6        | 94.5        | 74.1 [70.5-77.5]           | 88.0 [85.2-90.4] | 93.9 [91.3-95.8] | 97.3 [95.4-98.4] |
| Weight (kg), mean (SD) | 85.0 (15.6)       | 83.7 (15.4) | 81.5 (13.8) | 78.1 (12.6) | 87.3 [86.0-88.7]           | 84.5 [83.1-85.8] | 81.6 [80.3-83.0] | 78.6 [77.3-79.8] |
| Smoking status,        |                   |             |             |             |                            |                  |                  |                  |
| Ex-Smoker              | 49.0              | 54.0        | 55.4        | 56.4        | 61.8 [57.8-65.6]           | 64.0 [59.9-67.9] | 66.9 [62.2-71.3] | 75.0 [70.8-78.7] |
| Current                | 8.8               | 5.2         | 4.6         | 2.5         | 9.7 [7.4-12.6]             | 10.2 [7.7-13.2]  | 8.2 [5.9-11.4]   | 2.3 [1.3-4.0]    |
| Health conditions,     |                   |             |             |             |                            |                  |                  |                  |
| Heart problems         | 18.4              | 25.0        | 27.7        | 32.2        | 20.2 [17.1-23.7]           | 28.5 [24.9-32.4] | 35.1 [30.6-39.8] | 40.2 [35.8-44.9] |
| Diabetes               | 16.1              | 15.4        | 16.1        | 17.1        | 14.5 [11.8-17.6]           | 18.0 [14.9-21.5] | 19.4 [15.7-23.7] | 15.6 [12.5-19.2] |
| High Blood pressure    | 44.3              | 48.7        | 48.0        | 49.4        | 39.5 [35.6-43.5]           | 47.5 [43.4-51.6] | 49.8 [45.0-54.6] | 51.9 [47.2-56.5] |
| Stroke                 | 2.9               | 4.2         | 6.6         | 8.8         | 5.2 [3.6-7.4]              | 6.6 [4.8-9.1]    | 8.7 [6.3-11.7]   | 16.8 [13.5-20.6] |
| Arthritis              | 31.1              | 32.6        | 37.5        | 43.5        | 31.6 [27.9-35.4]           | 37.0 [33.1-41.1] | 40.6 [36.0-45.4] | 41.5 [37.0-46.2] |
| Dementia               | 0.4               | 0.4         | 0.7         | 2.0         | 0.5 [0.2-1.6]              | 1.7 [0.8-3.3]    | 2.3 [1.2-4.4]    | 4.9 [3.3-7.3]    |
| Osteoporosis           | 1.4               | 2.3         | 3.5         | 3.7         | 2.0 [1.2-3.5]              | 5.7 [4.0-8.1]    | 3.6 [2.1-5.9]    | 3.5 [2.1-5.7]    |
| Chronic lung disease   | 7.5               | 7.8         | 7.9         | 8.3         | 7.4 [5.4-10.0]             | 10.2 [7.9-13.1]  | 11.6 [8.8-15.2]  | 8.1 [5.9-10.9]   |
| <i>Unweighted N</i>    | 784               | 696         | 542         | 603         | 659                        | 624              | 458              | 503              |

ELSA=The English Longitudinal Study of Ageing, a national probability sample of non-institutionalised older people. Wave 8 (2016-2017) was used for this analysis. For variable definitions, see Supplemental Table S1 and for ELSA data management, see Stata do-file "Data\_management\_wave8\_Dec2019.do". Data were weighted to correct for non-response in the ELSA cohort study
